# Supplementary material for: A one-pot synthesis of 2,2′-disubstituted diindolylmethanes (DIMs) via a sequential Sonogashira coupling and cycloisomerization/C3-functionalization of 2-iodoanilines
Source: Royal Society of Chemistry journal article supplement (doi:10.1039/c7ob01701d), 2017-01-01

## Supplementary material for:

### **A one-pot synthesis of 2,2'-disubstituted diindolylmethanes (DIMs) via a sequential Sonogashira coupling and cycloisomerization/C3-functionalization of 2-iodolanilines**

**Anirban Kayet,<sup>a</sup> and Vinod K. Singh<sup>\*,a,b</sup>**

<sup>a</sup>*Department of Chemistry, Indian Institute of Science Education and Research Bhopal - 462 066, MP, India.*

<sup>b</sup>*Department of Chemistry, Indian Institute of Technology Kanpur - 208 016, UP, India.*

\*E-mail: [vinodks@iitk.ac.in](mailto:vinodks@iitk.ac.in)

## Table of Contents

|                                                                                                |        |
|------------------------------------------------------------------------------------------------|--------|
| Optimization Studies                                                                           | S2     |
| Plausible mechanism for the formation of DIMs                                                  | S3     |
| Crystal structure of compound <b>3aM</b>                                                       | S4     |
| References                                                                                     | S5     |
| Spectral graphics ( <sup>1</sup> H, <sup>13</sup> C, <sup>31</sup> P, and <sup>19</sup> F) NMR | S6-S87 |

**Table 1. Optimization studies<sup>a</sup>**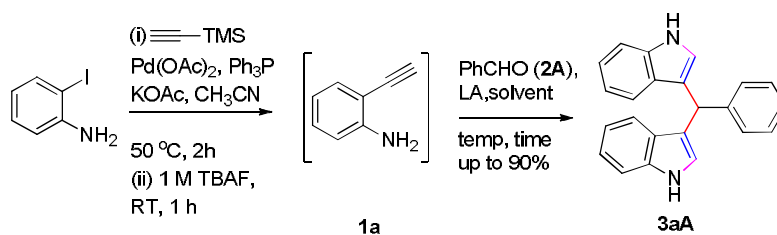

| entry     | LA                       | mol%     | solvent                         | temperature<br>(° C) | time         | yield (%) <sup>b</sup> |
|-----------|--------------------------|----------|---------------------------------|----------------------|--------------|------------------------|
| 1         | Zn(OTf) <sub>2</sub>     | 10       | CH <sub>3</sub> CN              | 25                   | 12 h         | NR <sup>c</sup>        |
| 2         | Cu(OTf) <sub>2</sub>     | 10       | CH <sub>3</sub> CN              | 25                   | 12 h         | NR <sup>c</sup>        |
| 3         | AgOTf                    | 10       | CH <sub>3</sub> CN              | 25                   | 12 h         | NR <sup>c</sup>        |
| 4         | AgOAc                    | 10       | CH <sub>3</sub> CN              | 25                   | 12 h         | NR <sup>c</sup>        |
| 5         | AgOTf                    | 10       | CH <sub>3</sub> CN              | 50                   | 12 h         | NR <sup>c</sup>        |
| 6         | AgOTf                    | 10       | CH <sub>2</sub> Cl <sub>2</sub> | 25                   | 8 h          | 35 <sup>d</sup>        |
| 7         | AgOAc                    | 10       | CH <sub>2</sub> Cl <sub>2</sub> | 25                   | 12 h         | NR <sup>c</sup>        |
| 8         | AgClO <sub>4</sub>       | 10       | CH <sub>2</sub> Cl <sub>2</sub> | 25                   | 12 h         | 20 <sup>d</sup>        |
| 9         | AgSbF <sub>6</sub>       | 10       | CH <sub>2</sub> Cl <sub>2</sub> | 25                   | 8 h          | 40 <sup>e</sup>        |
| 10        | AgBF <sub>4</sub>        | 10       | CH <sub>2</sub> Cl <sub>2</sub> | 25                   | 8 h          | 25 <sup>d</sup>        |
| 11        | AgPF <sub>6</sub>        | 10       | CH <sub>2</sub> Cl <sub>2</sub> | 25                   | 8 h          | 20 <sup>d</sup>        |
| 12        | AgNO <sub>3</sub>        | 10       | CH <sub>2</sub> Cl <sub>2</sub> | 25                   | 8 h          | NR <sup>c</sup>        |
| 13        | AgSbF <sub>6</sub>       | 10       | DCE                             | 25                   | 8 h          | 65 <sup>e</sup>        |
| 14        | AgSbF <sub>6</sub>       | 10       | THF                             | 25                   | 8 h          | 20 <sup>d</sup>        |
| 15        | AgSbF <sub>6</sub>       | 10       | Et <sub>2</sub> O               | 25                   | 8 h          | NR <sup>c</sup>        |
| 16        | AgSbF <sub>6</sub>       | 10       | EtOH                            | 25                   | 8 h          | NR <sup>c</sup>        |
| 17        | AgSbF <sub>6</sub>       | 10       | dioxane                         | 25                   | 8 h          | NR <sup>c</sup>        |
| 18        | AgSbF <sub>6</sub>       | 10       | benzene                         | 25                   | 8 h          | NR <sup>c</sup>        |
| 19        | AgSbF <sub>6</sub>       | 10       | toluene                         | 25                   | 8 h          | 40 <sup>d</sup>        |
| 20        | AgSbF <sub>6</sub>       | 10       | DME                             | 25                   | 8 h          | NR <sup>c</sup>        |
| 21        | AgSbF <sub>6</sub>       | 10       | DMF                             | 25                   | 8 h          | NR <sup>c</sup>        |
| 22        | AgOTf                    | 10       | DCE                             | 25                   | 8 h          | 60 <sup>e</sup>        |
| 23        | AgSbF <sub>6</sub>       | 10       | DCE                             | 40                   | 3 h          | 90                     |
| 24        | AgSbF <sub>6</sub>       | 10       | DCE                             | 50                   | 2 h          | 90                     |
| 25        | AgSbF <sub>6</sub>       | 10       | DCE                             | 60                   | 2 h          | 90                     |
| 26        | AgOTf                    | 10       | DCE                             | 40                   | 3 h          | 87                     |
| 27        | AgOTf                    | 10       | DCE                             | 50                   | 2 h          | 85                     |
| 28        | AgOTf                    | 10       | DCE                             | 60                   | 2 h          | 85                     |
| <b>29</b> | <b>AgSbF<sub>6</sub></b> | <b>5</b> | <b>DCE</b>                      | <b>50</b>            | <b>2.5 h</b> | <b>90</b>              |
| <b>30</b> | <b>AgOTf</b>             | <b>5</b> | <b>DCE</b>                      | <b>50</b>            | <b>2.5 h</b> | <b>88</b>              |
| 31        | AgSbF <sub>6</sub>       | 2.5      | DCE                             | 50                   | 6 h          | 50 <sup>f</sup>        |
| 32        | AgOTf                    | 2.5      | DCE                             | 50                   | 6 h          | 51 <sup>f</sup>        |

<sup>a</sup>reactions were carried out using 0.4 mmol of each 2-iodo aniline and trimethyl silyl acetylene, 0.2 mmol of benzaldehyde in the presence of 10 mol% of LA. <sup>b</sup>Yield of isolated product after column purification. <sup>c</sup>No reaction. Both **1a** and **2A** were recovered.

<sup>d</sup>Unreacted **1a** and **2A** were recovered. <sup>e</sup>Unreacted **2A** and indole of **1a** were recovered.

<sup>f</sup>Unreacted **1a**, indole of **1a** and unreacted **2A** were recovered.

### Plausible mechanism for the formation of DIMs

On the basis of the above mentioned results of the domino process, we could propose a plausible mechanism where Ag(I) could initiate the coordination with both the alkyne unit<sup>1</sup> as well as carbonyl moiety (Scheme 2), and this could help sequential cycloisomerization of unprotected *o*-alkynyl anilines followed by Friedel–Craft reaction of C3 of the first indole moiety to the carbonyl carbon of aryl and heteroaryl aldehyde or aliphatic ketones to produce an intermediate **B**. The Ag(I) of this intermediate may then activate the second *o*-alkynylaniline which would lead to second indole annulations, forming the intermediate **C**. This bond forming-bond breaking cascade would allow the formation of our desired products DIMs. Water is removed and the Ag(I) catalyst is regenerated as shown below.

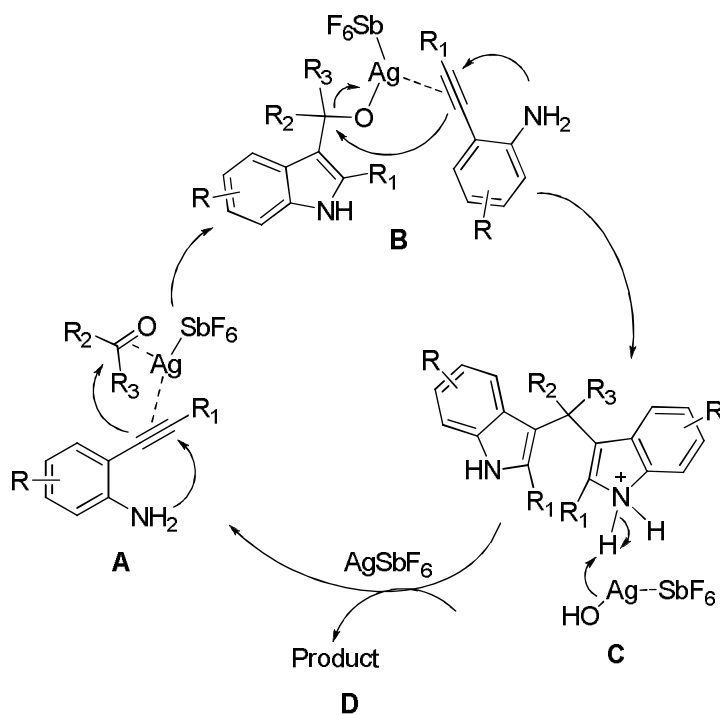

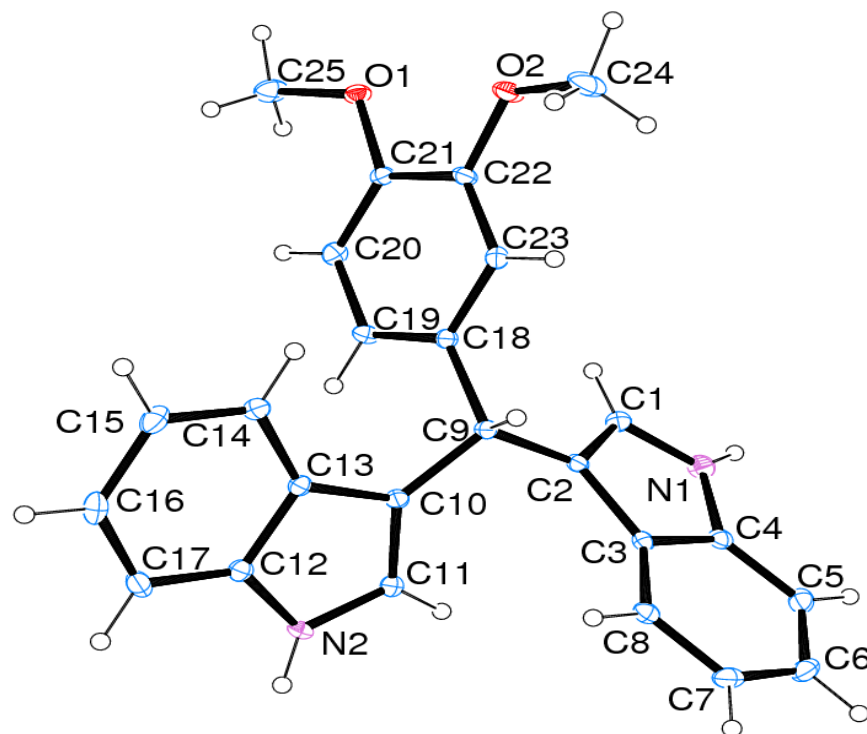

**Figure 1:** X-ray crystal structure of compound **3aM** (CCDC-1528295)

**References:**

- (1) (a) C. H. Oh, S. Karmakar, H. S. Park, Y. C. Ahn and J. W. Kim, *J. Am. Chem. Soc.* 2010, **132**, 1792; (b) M. Bera and S. Roy, *J. Org. Chem.* 2009, **74**, 8814; (c) J. Zhao, C. O. Hughes and F. D. Toste, *J. Am. Chem. Soc.* 2006, **128**, 7436; (d) J. T. Binder, and S. F. Kirsch, *Org. Lett.* 2006, **8**, 2151; (e) K. K. Klausmeyer, R. P. Feazell and J. H. Reibenspies, *Inorg. Chem.* 2004, **43**, 1130.

## Spectral Graphics

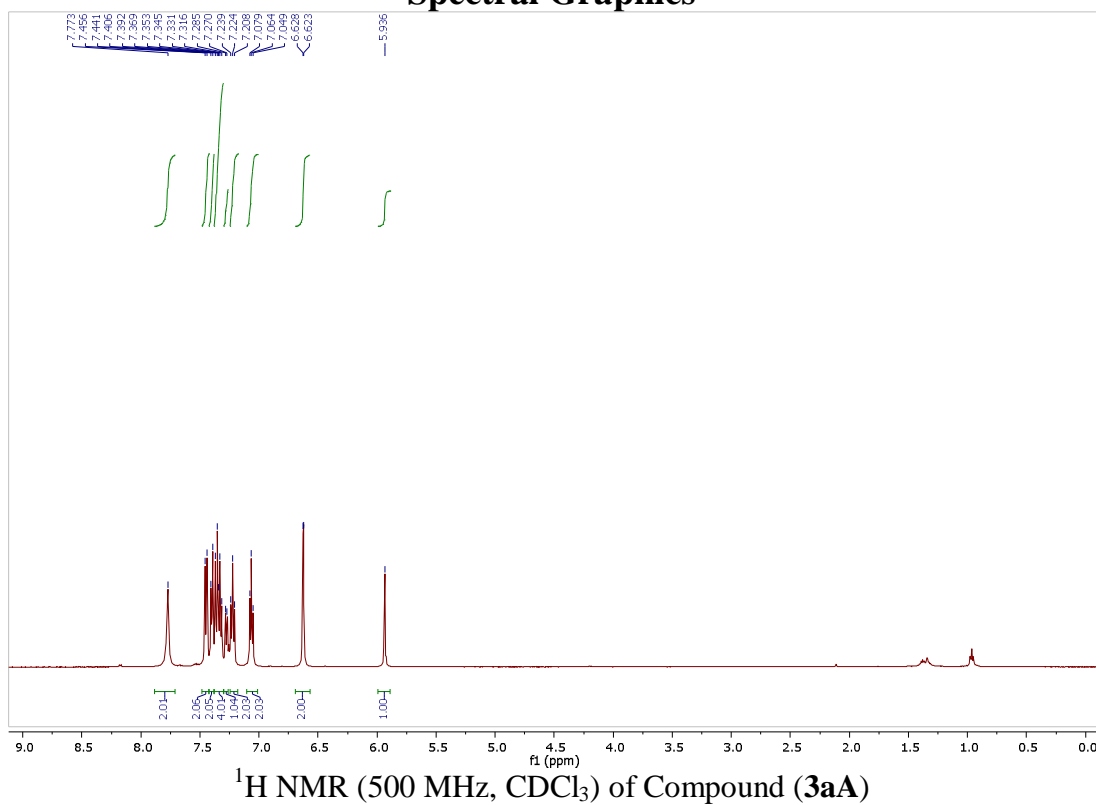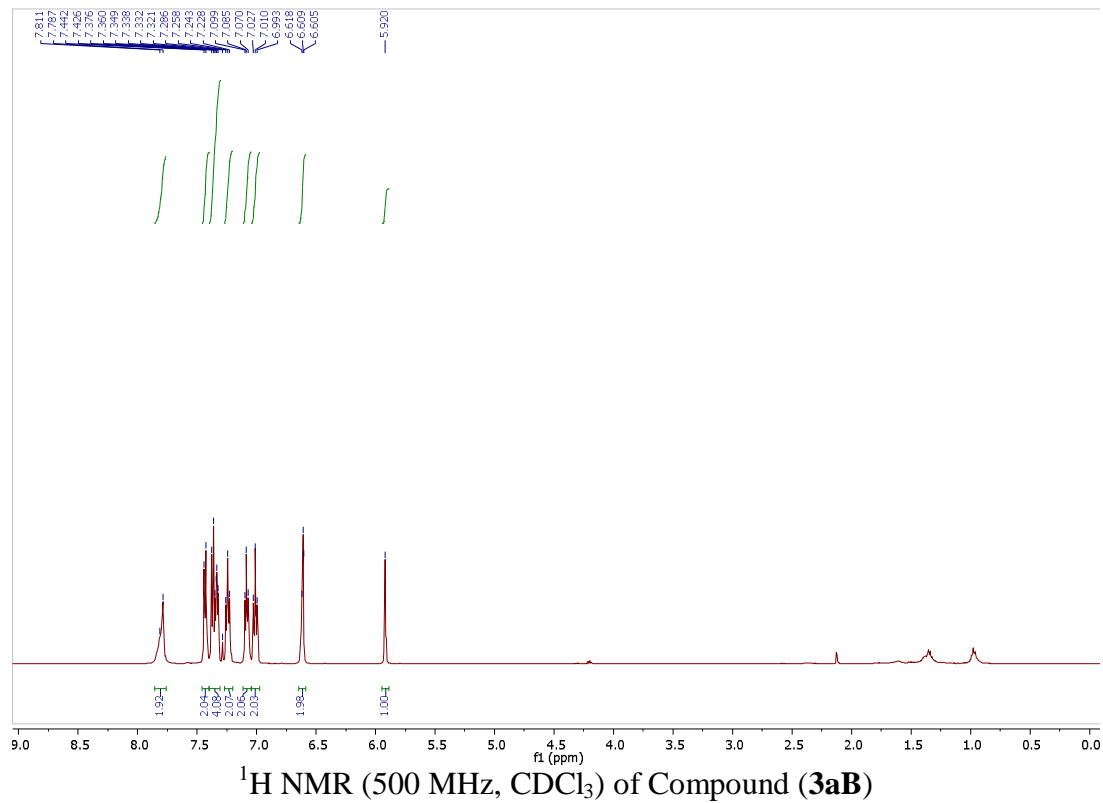

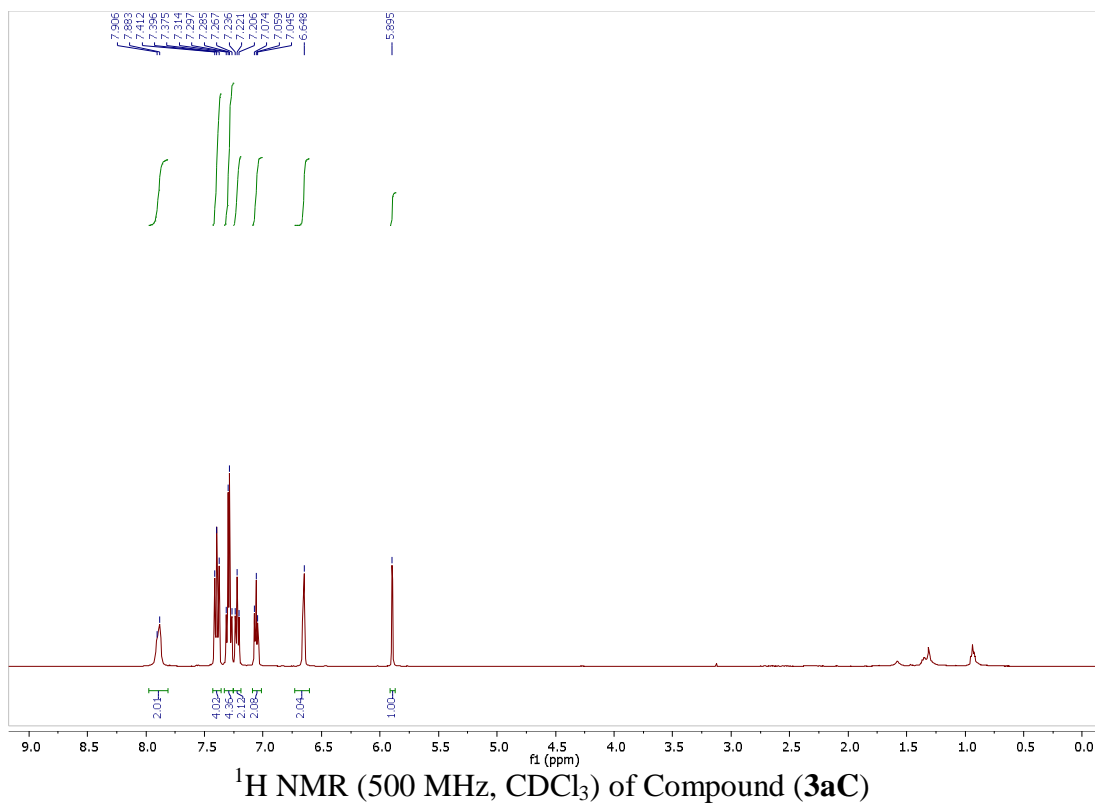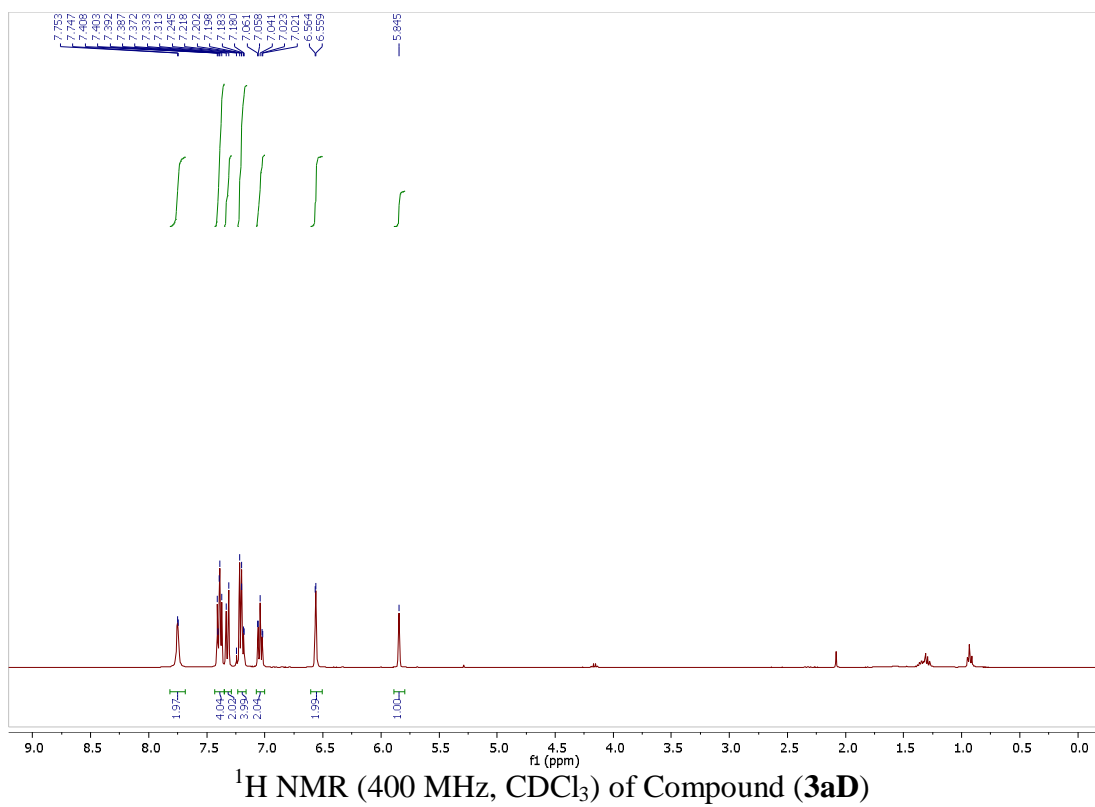

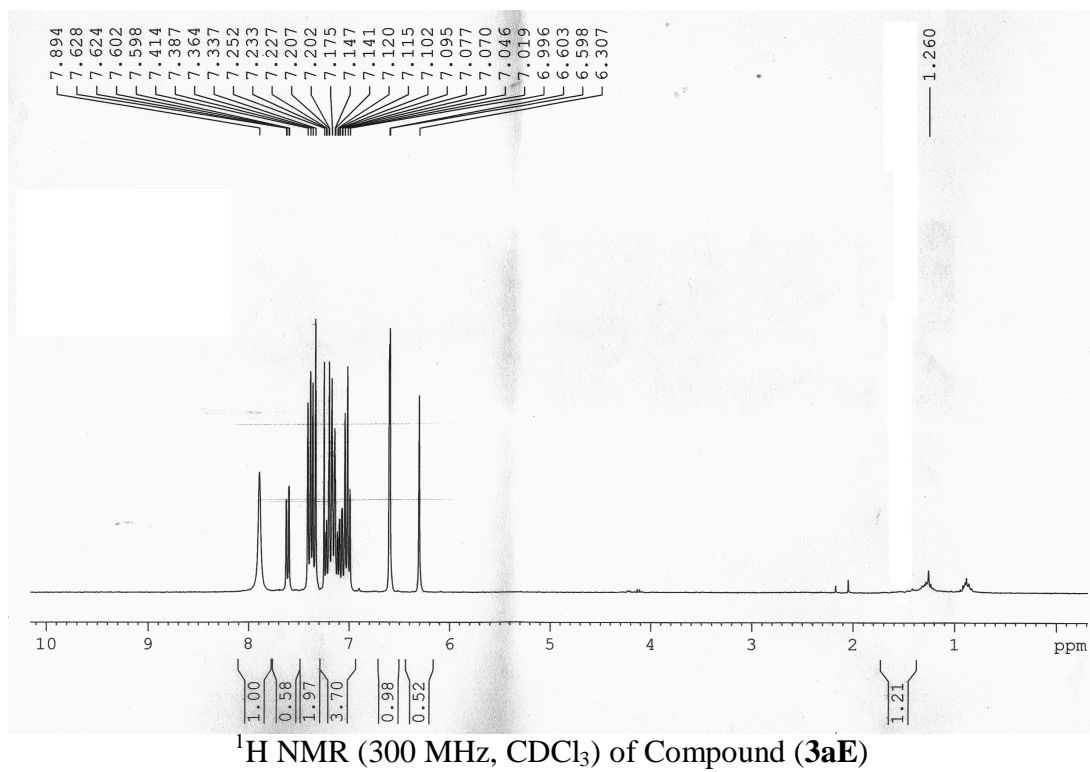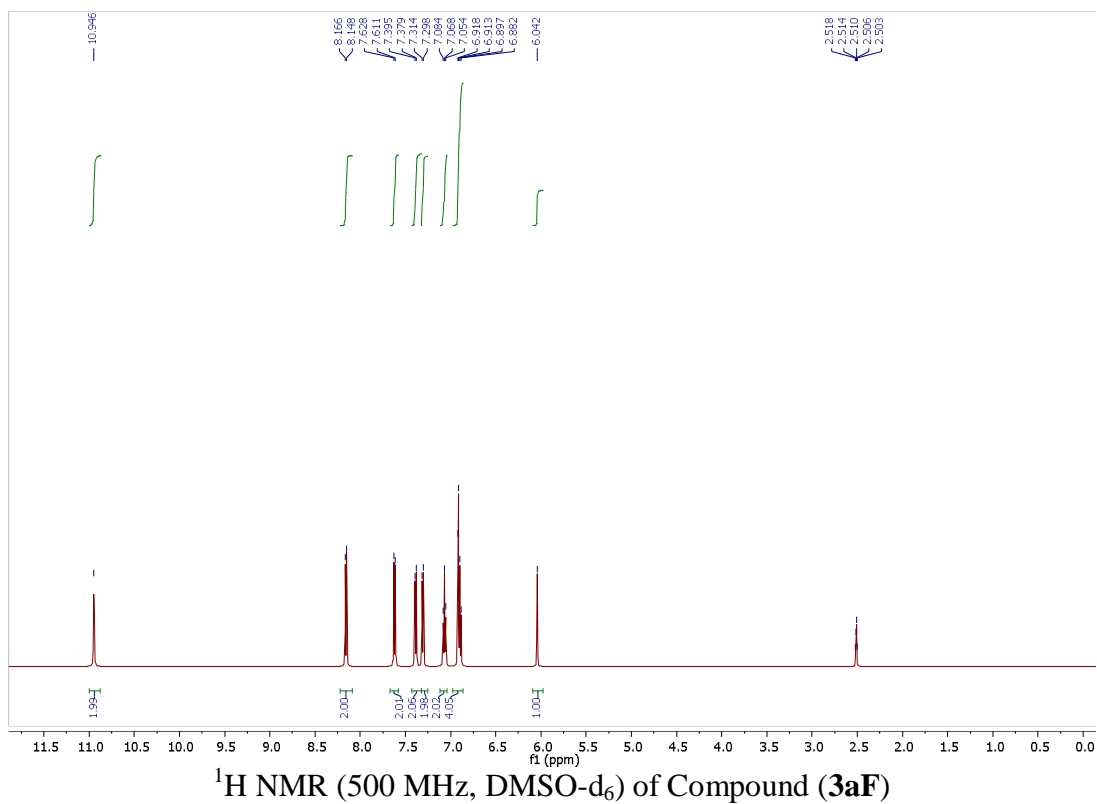

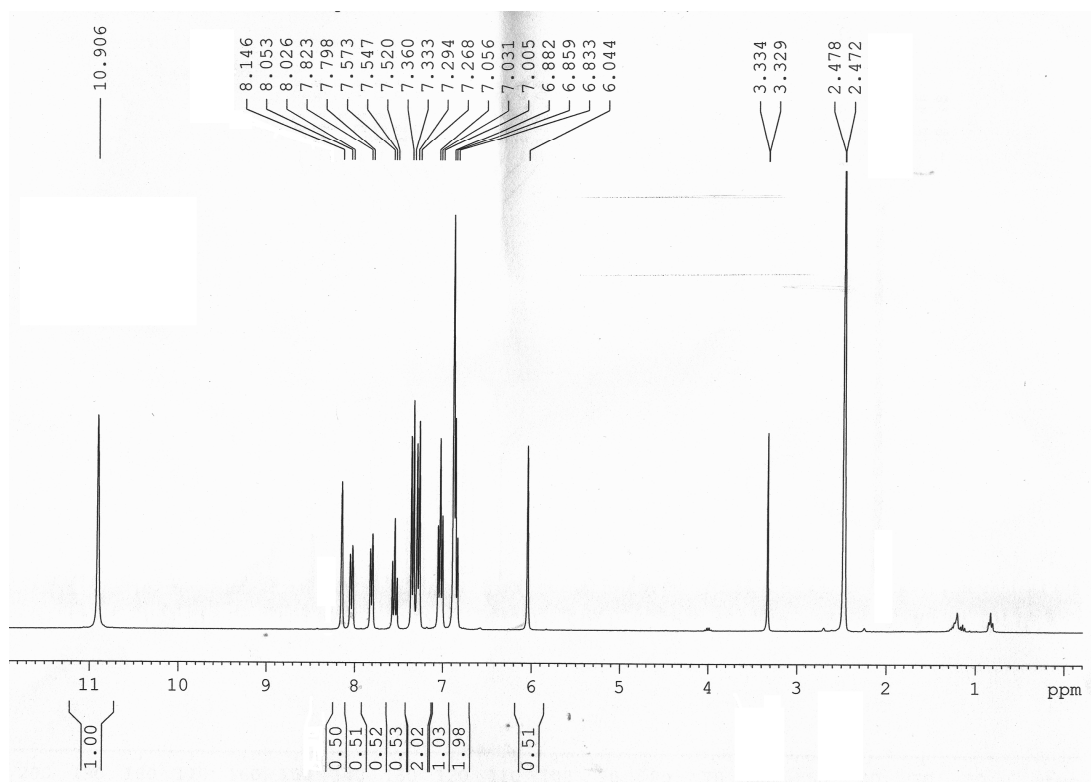

<sup>1</sup>H NMR (300 MHz, DMSO-d<sub>6</sub>) of Compound (3aG)

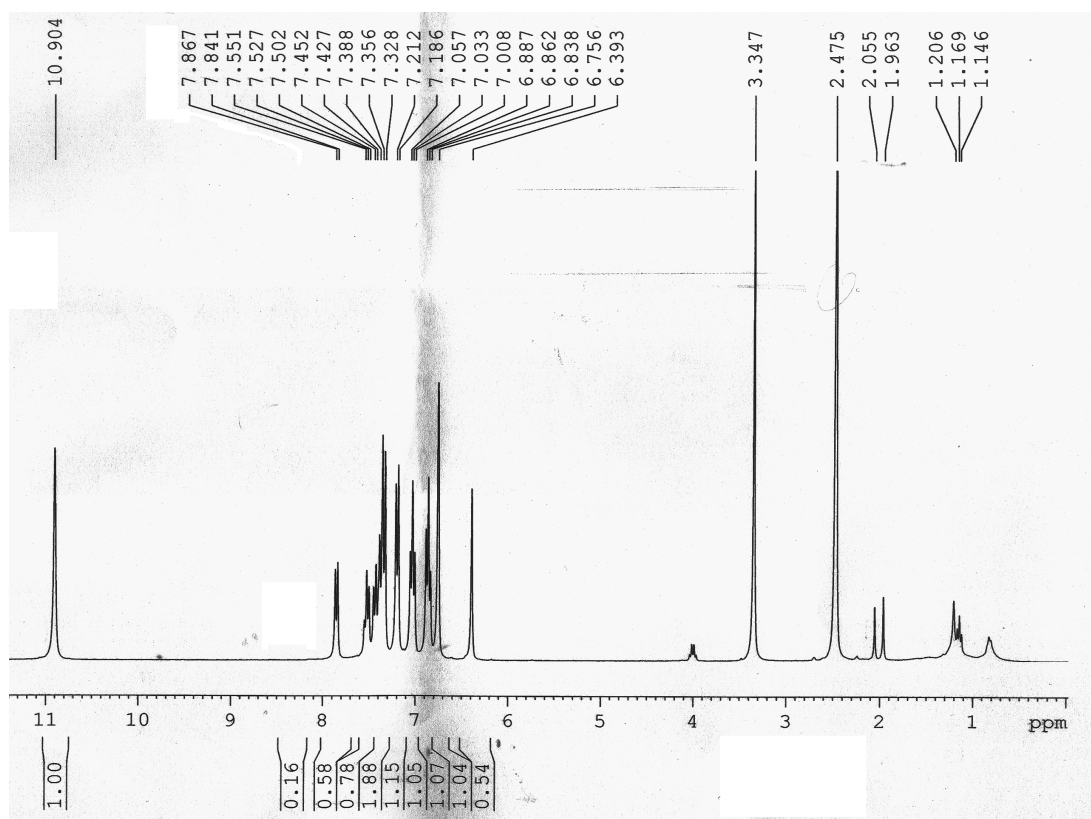

<sup>1</sup>H NMR (300 MHz, DMSO-d<sub>6</sub>) of Compound (3aH)

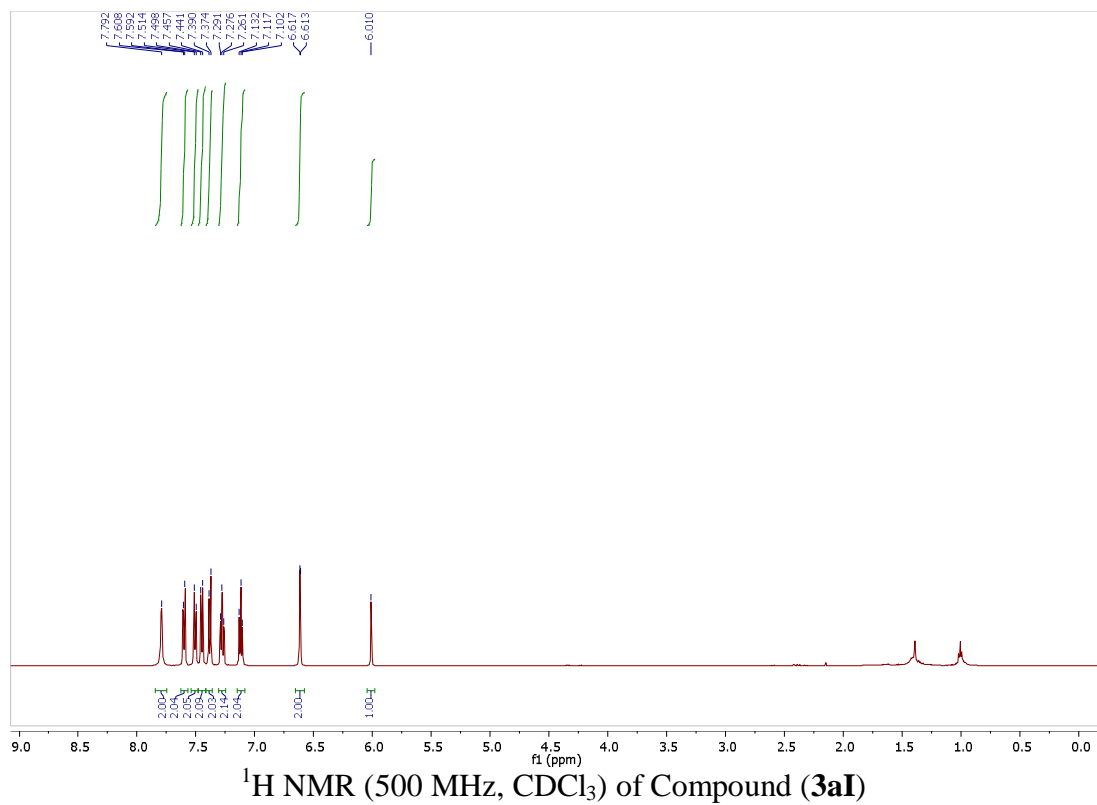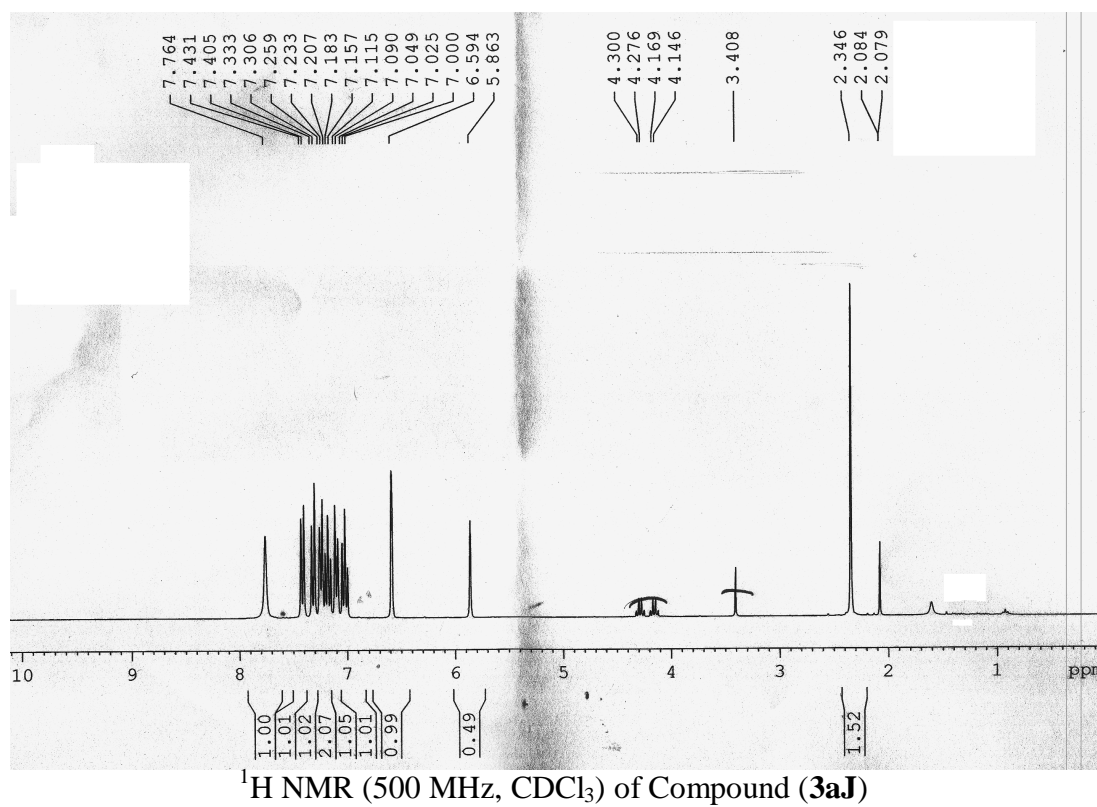

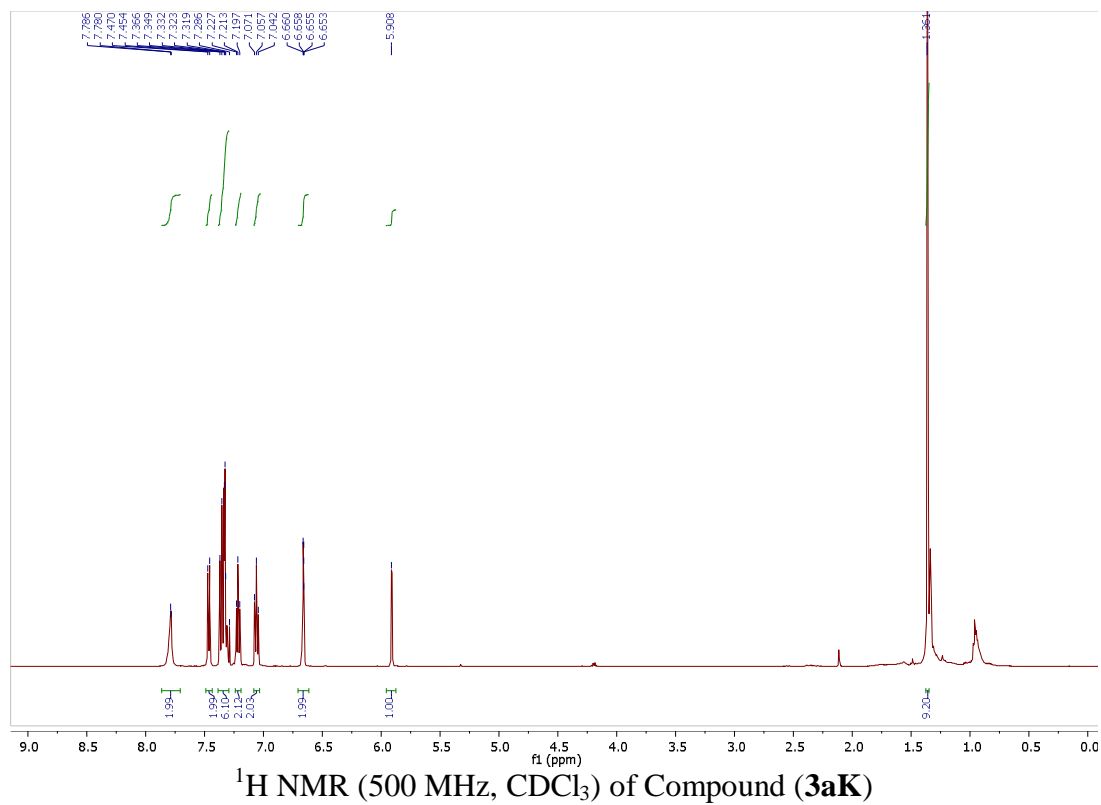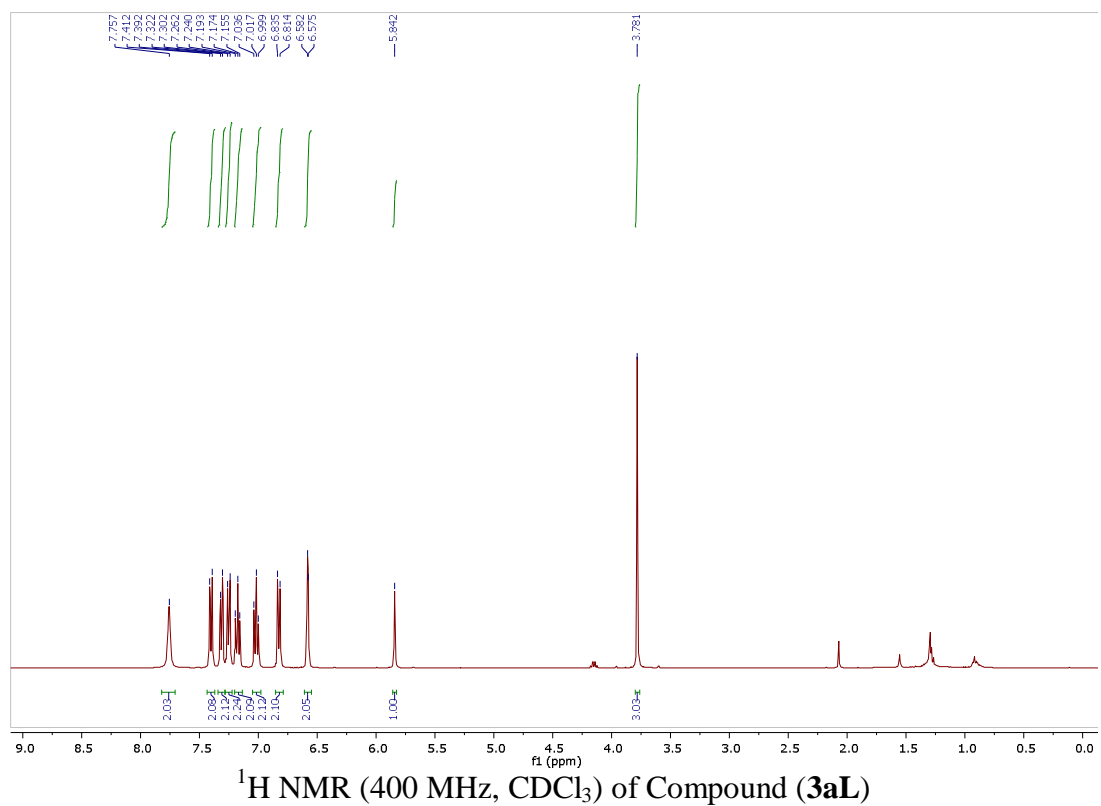

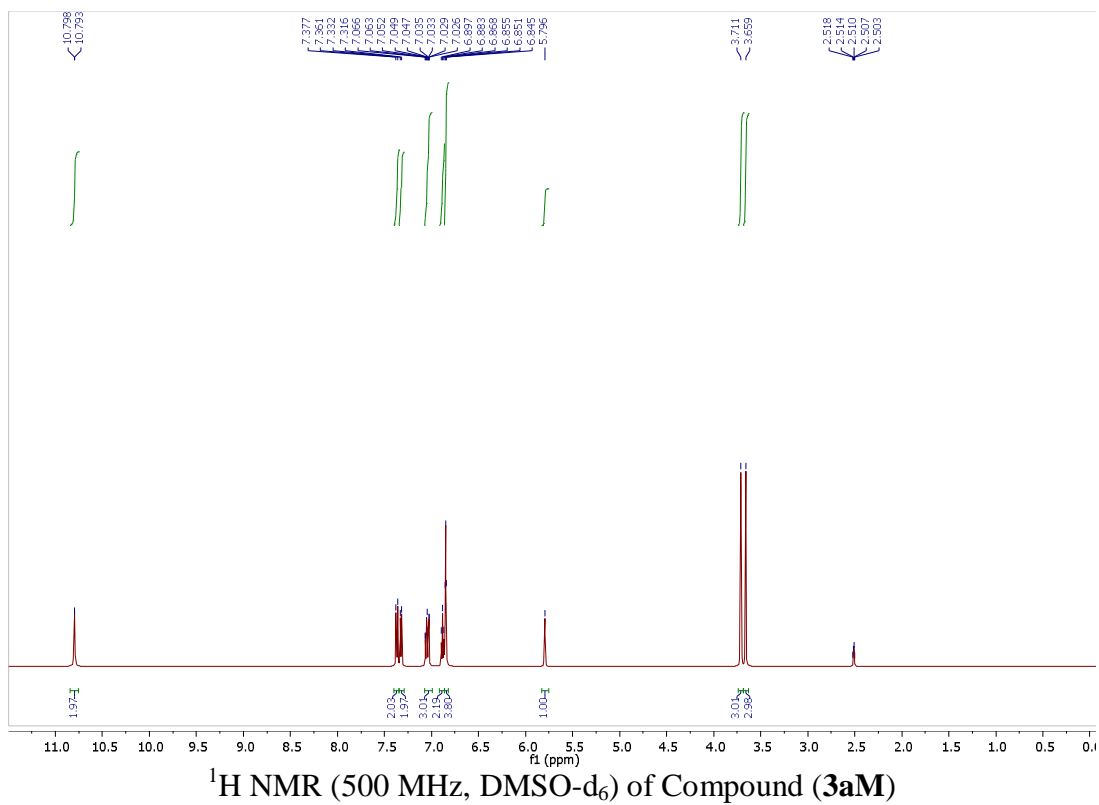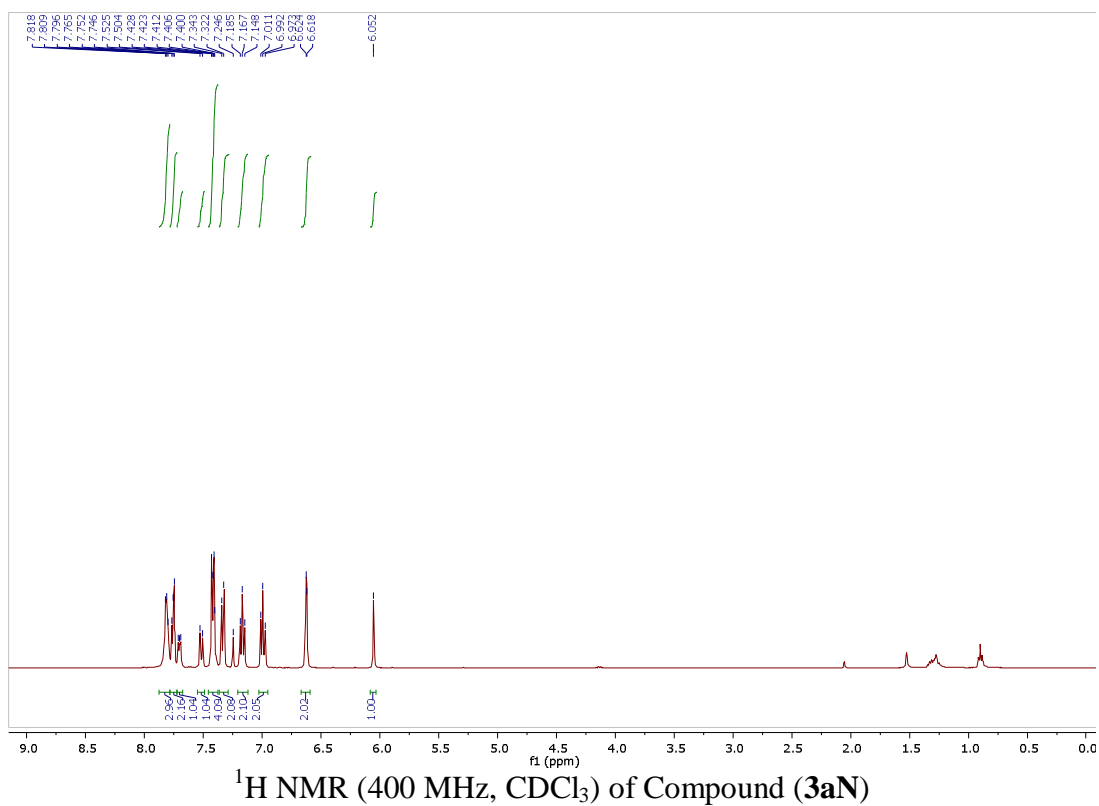

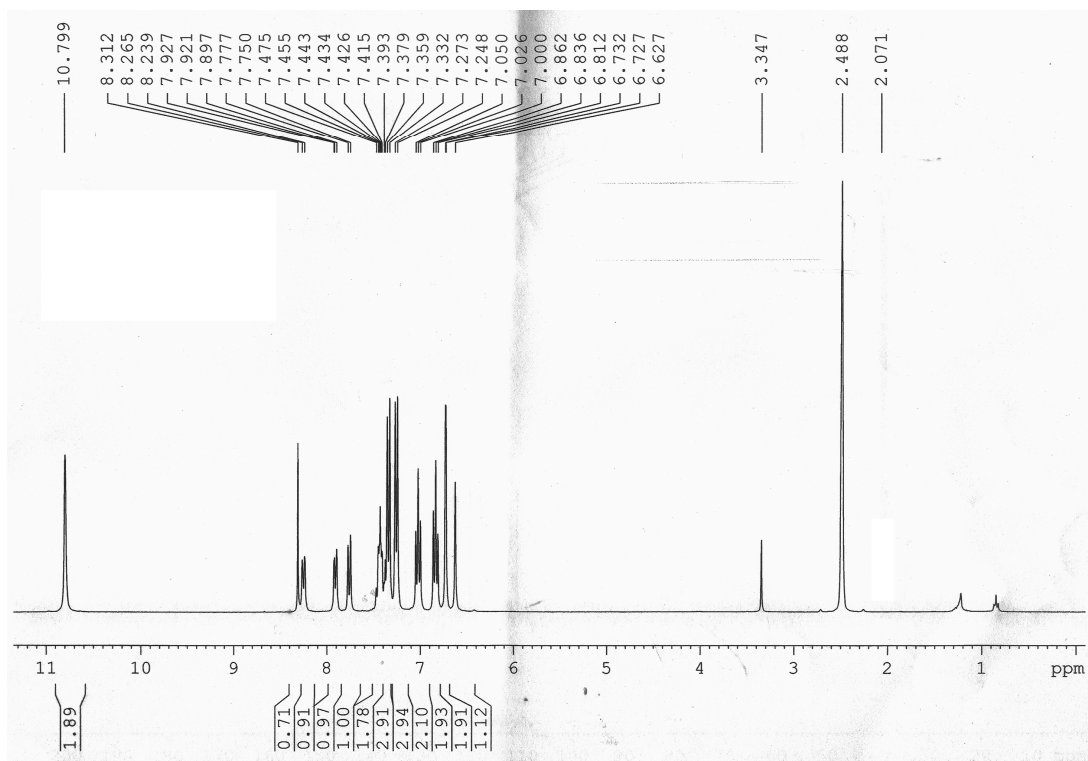

<sup>1</sup>H NMR (300 MHz, DMSO-d<sub>6</sub>) of Compound (3aO)

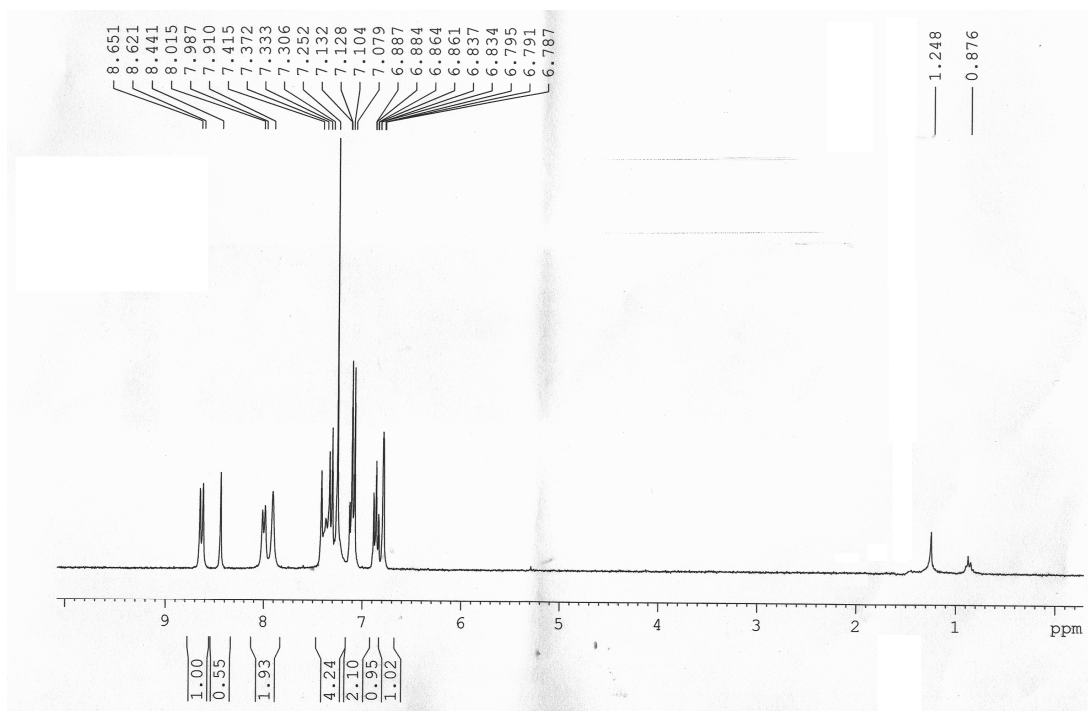

<sup>1</sup>H NMR (300 MHz, CDCl<sub>3</sub>) of Compound (3aP)

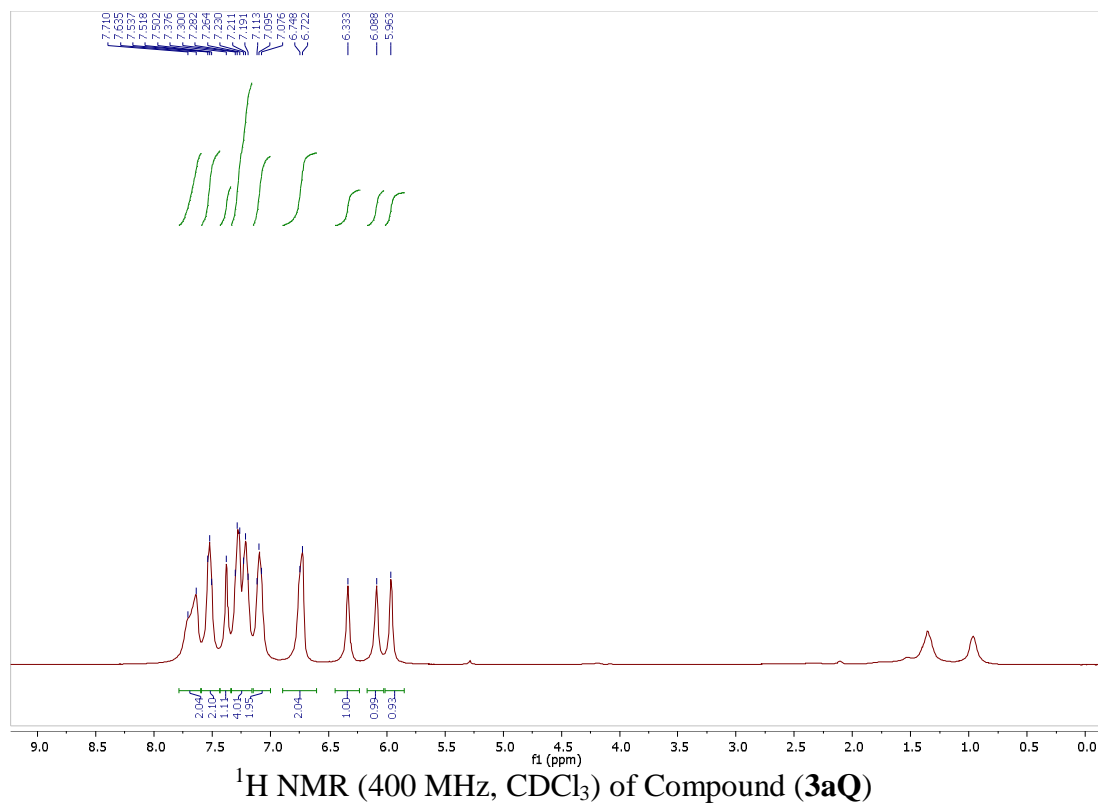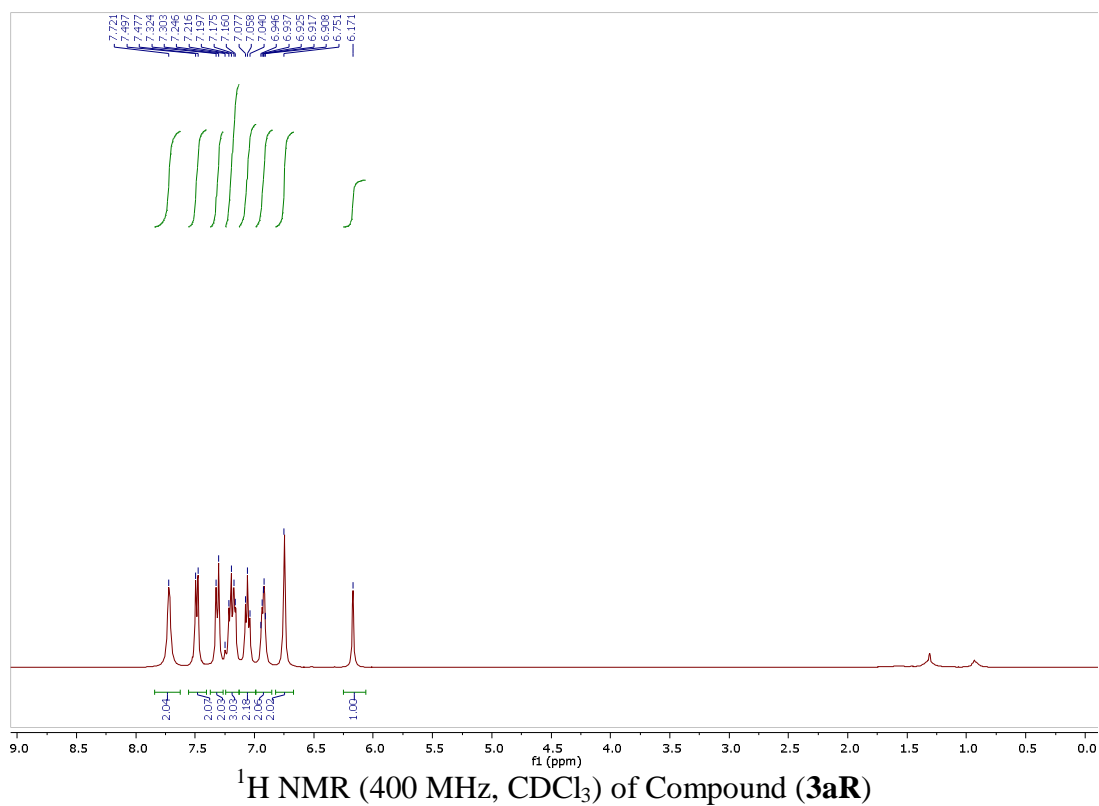

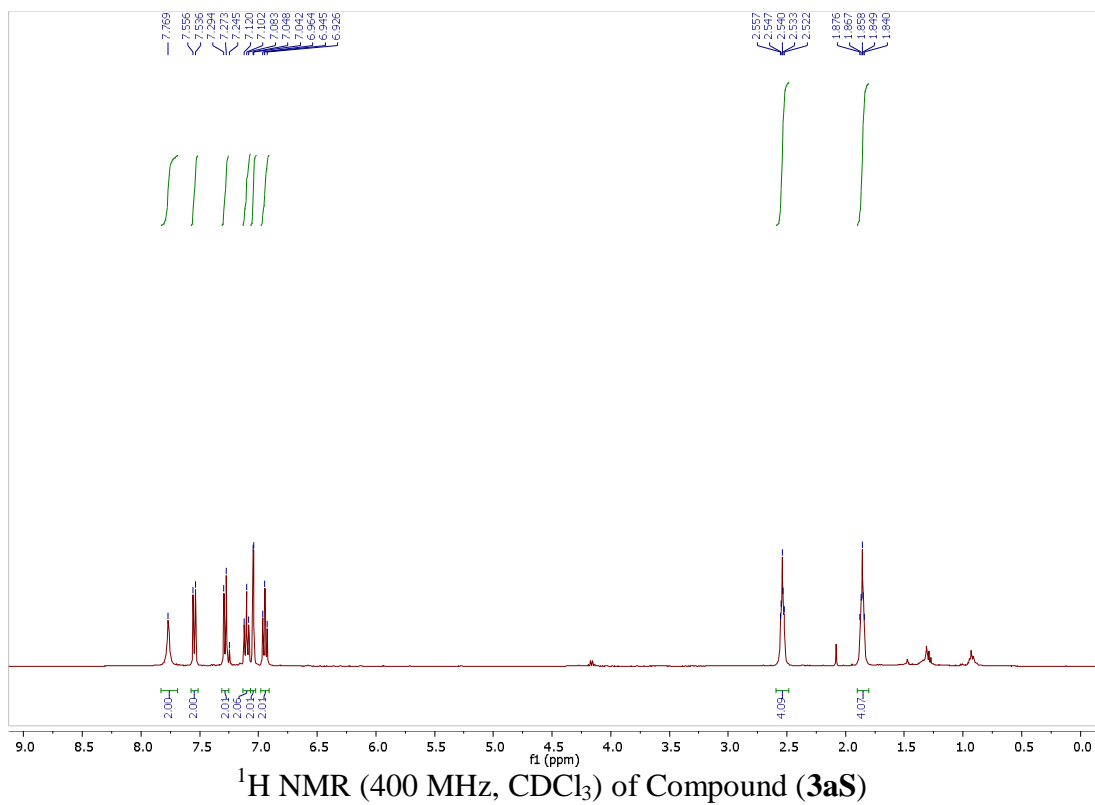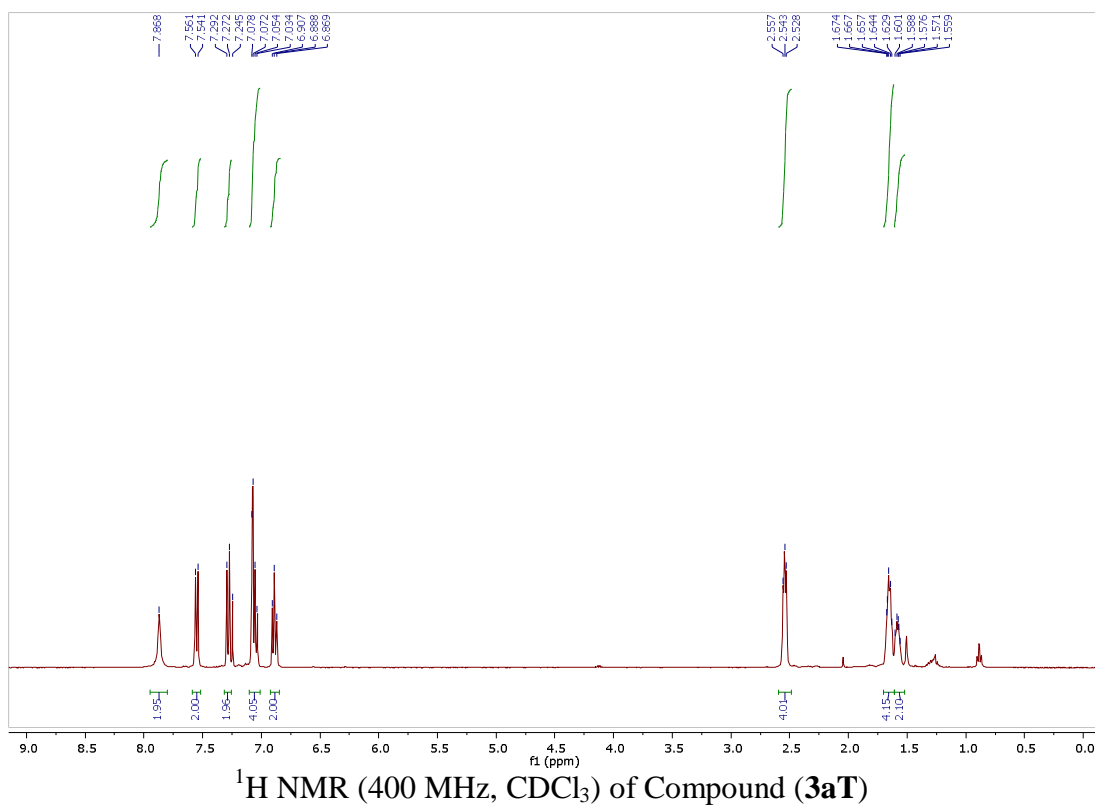

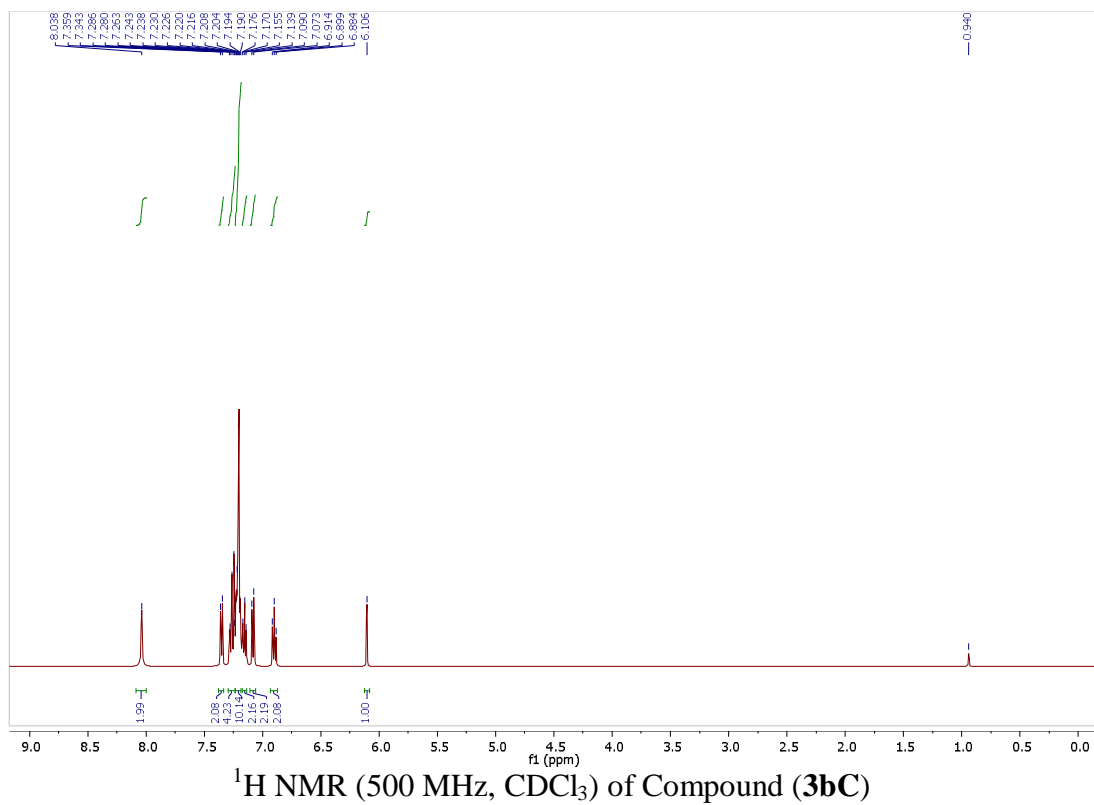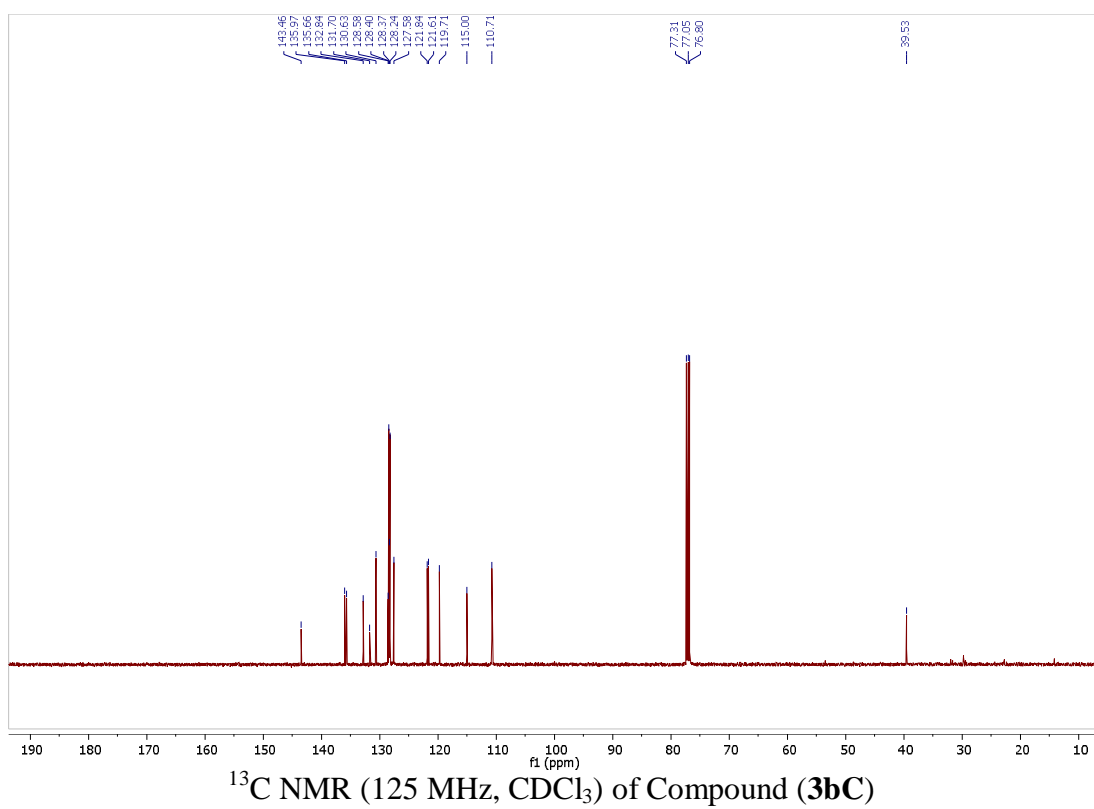

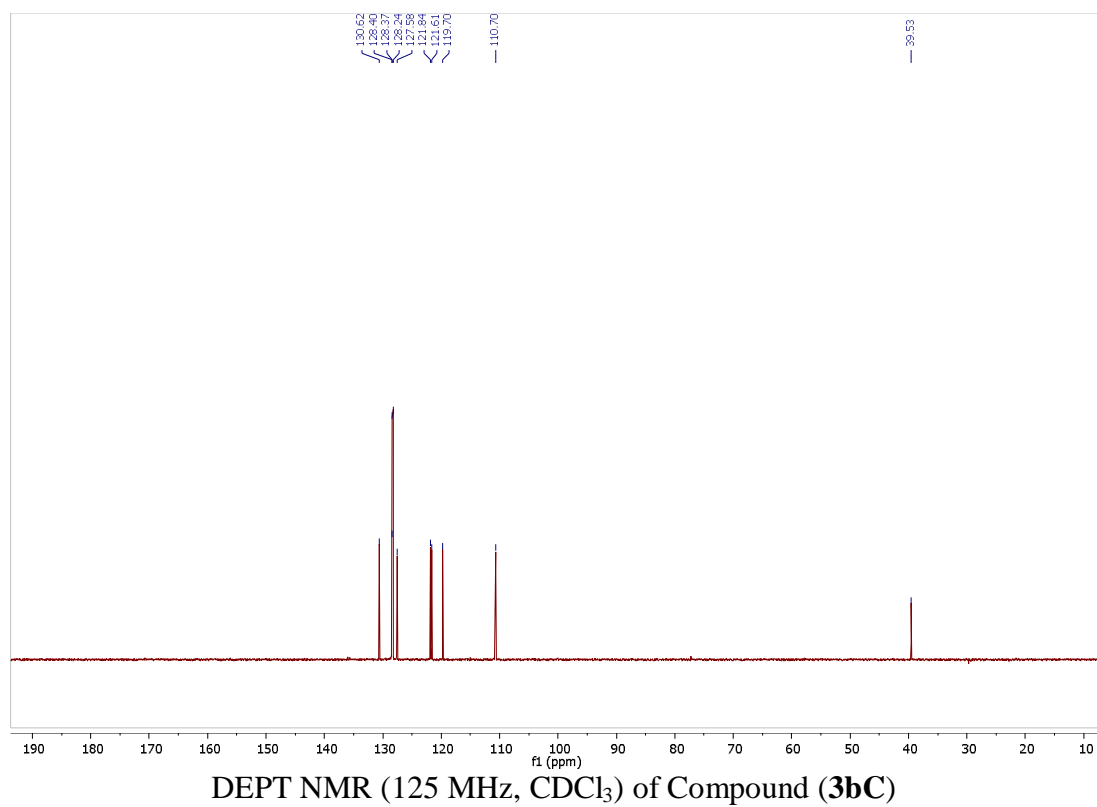

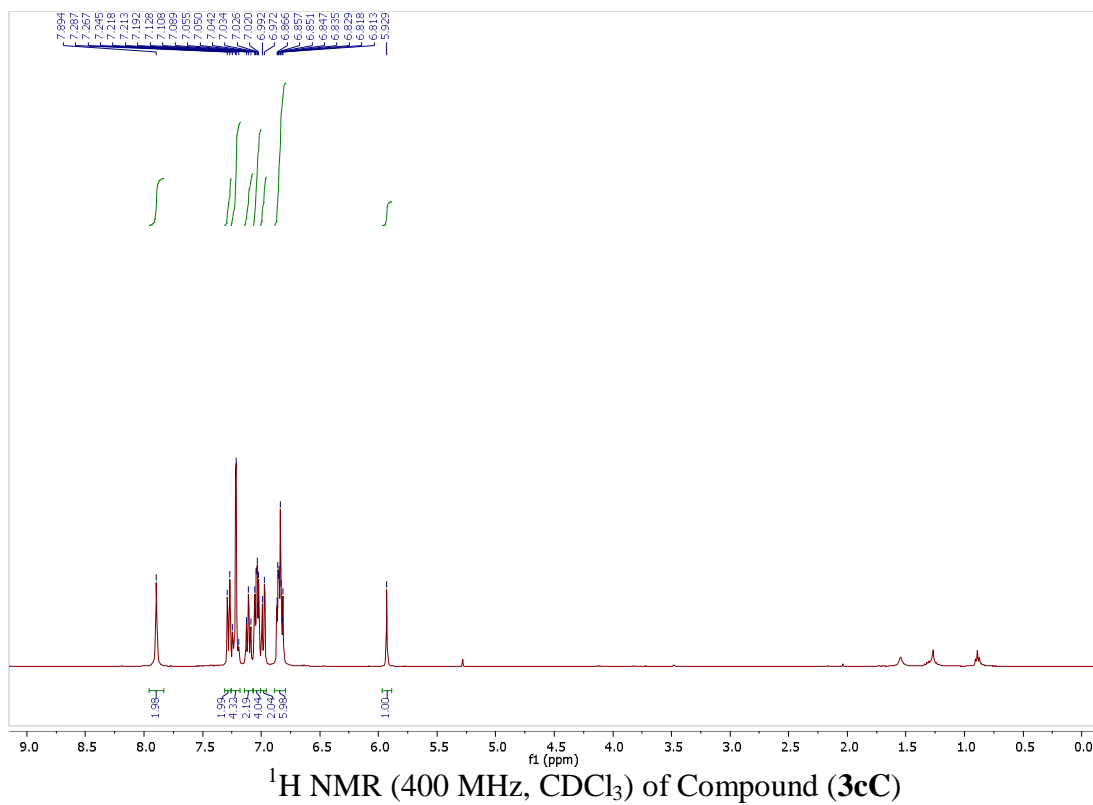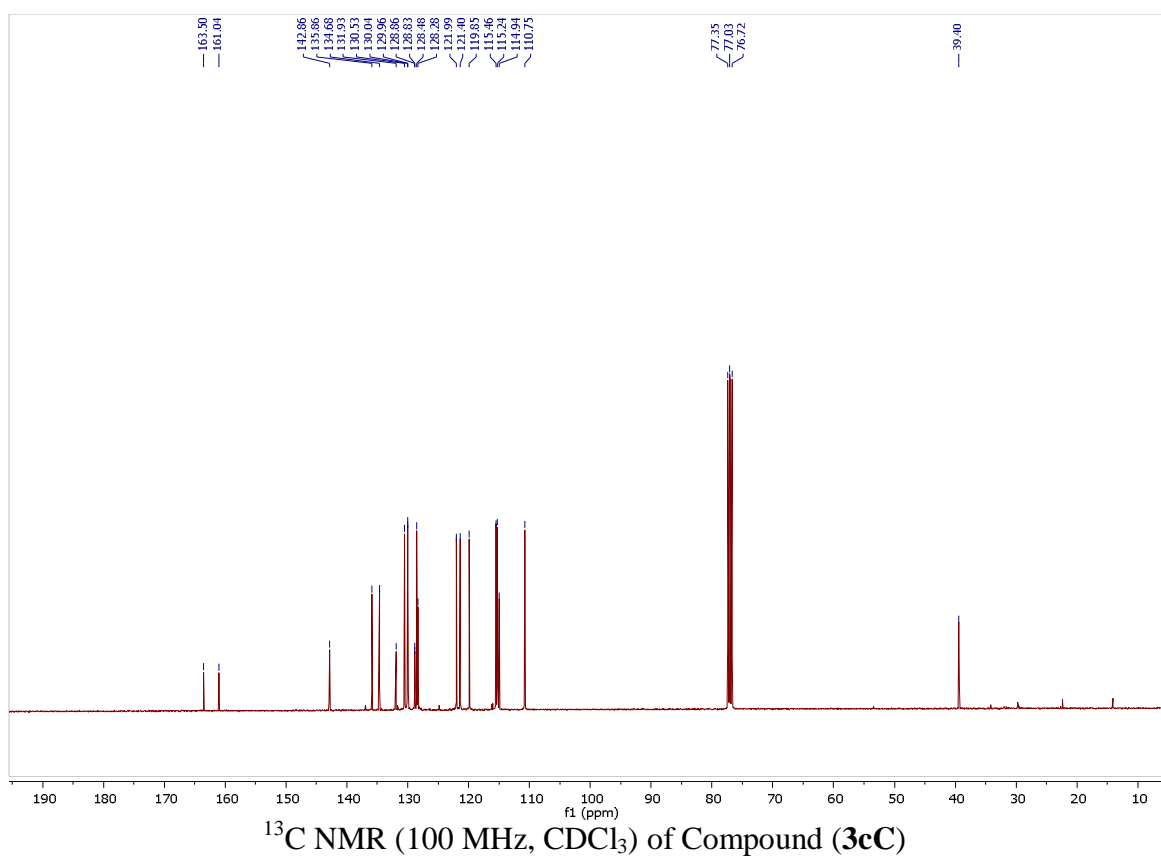

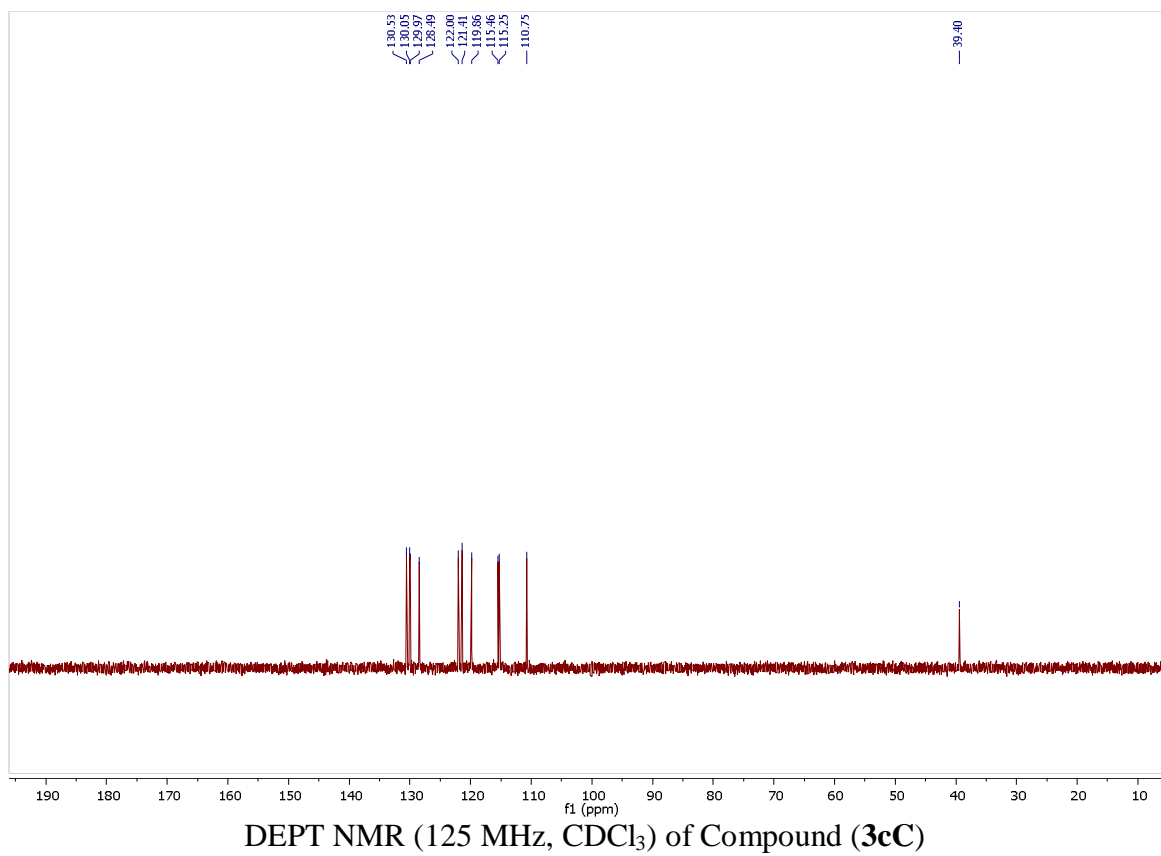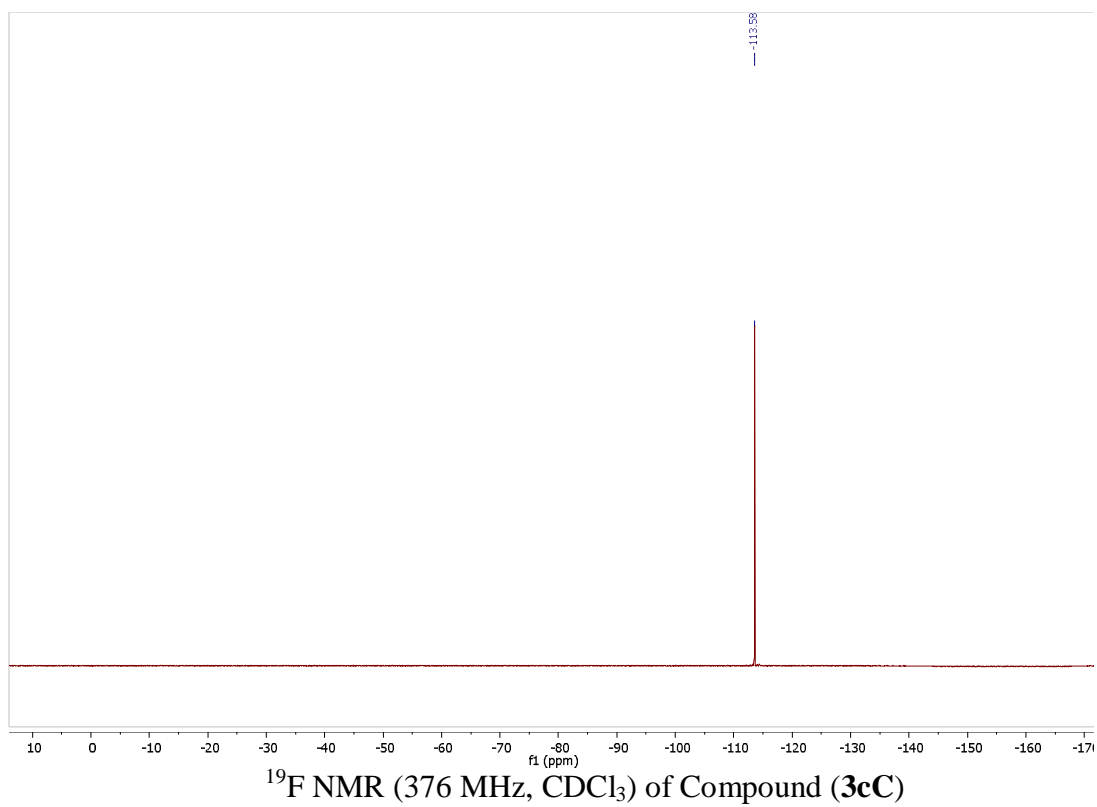

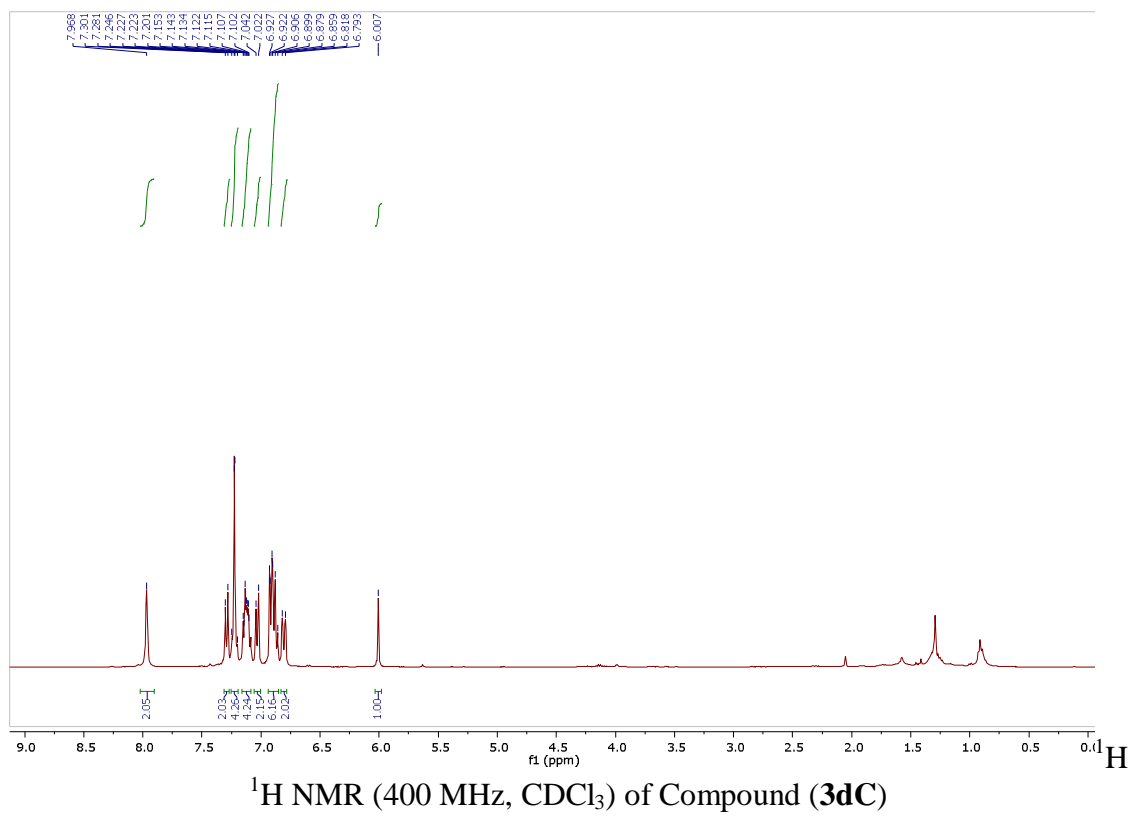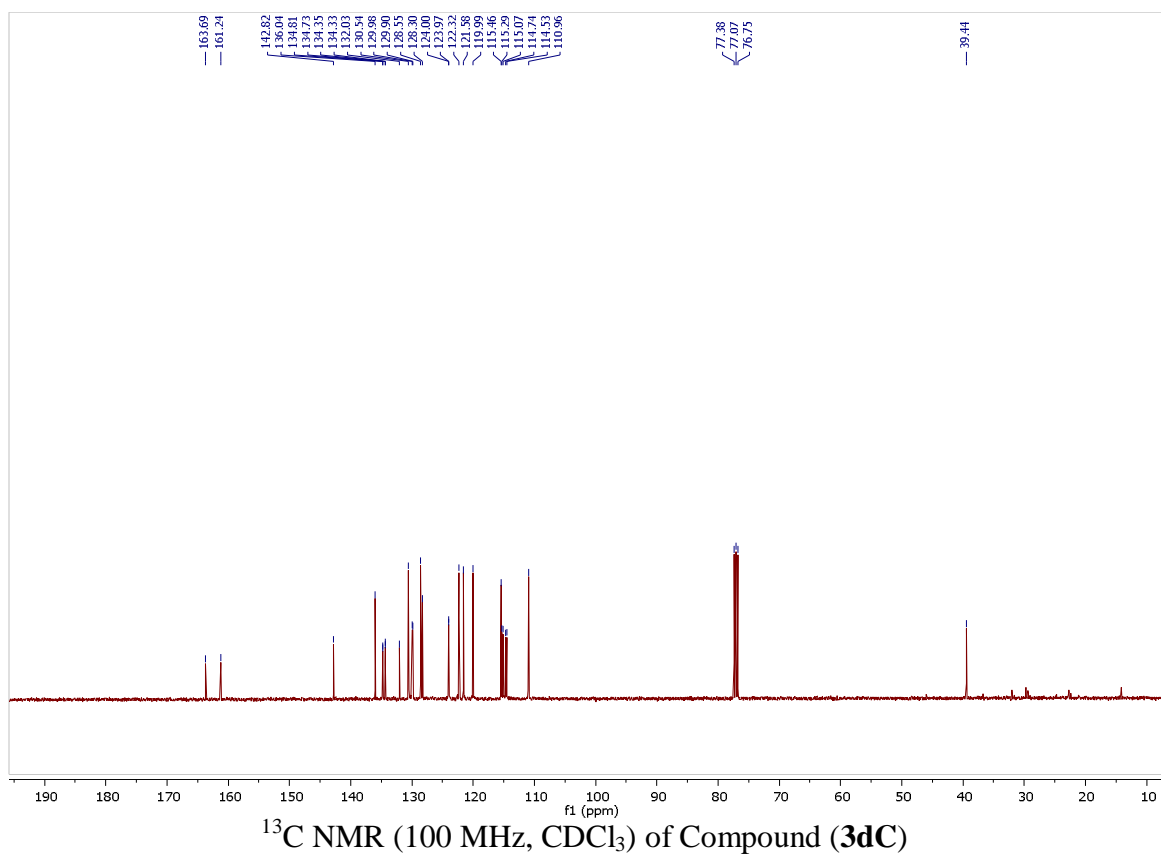

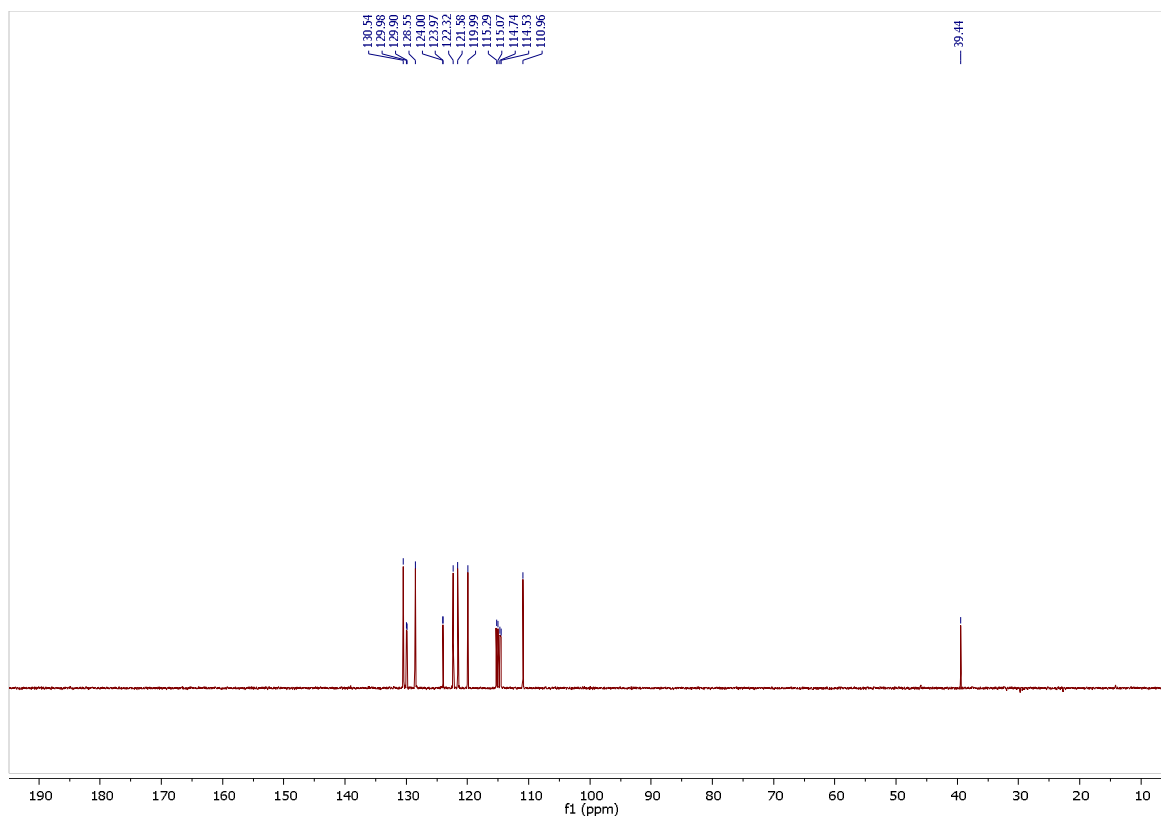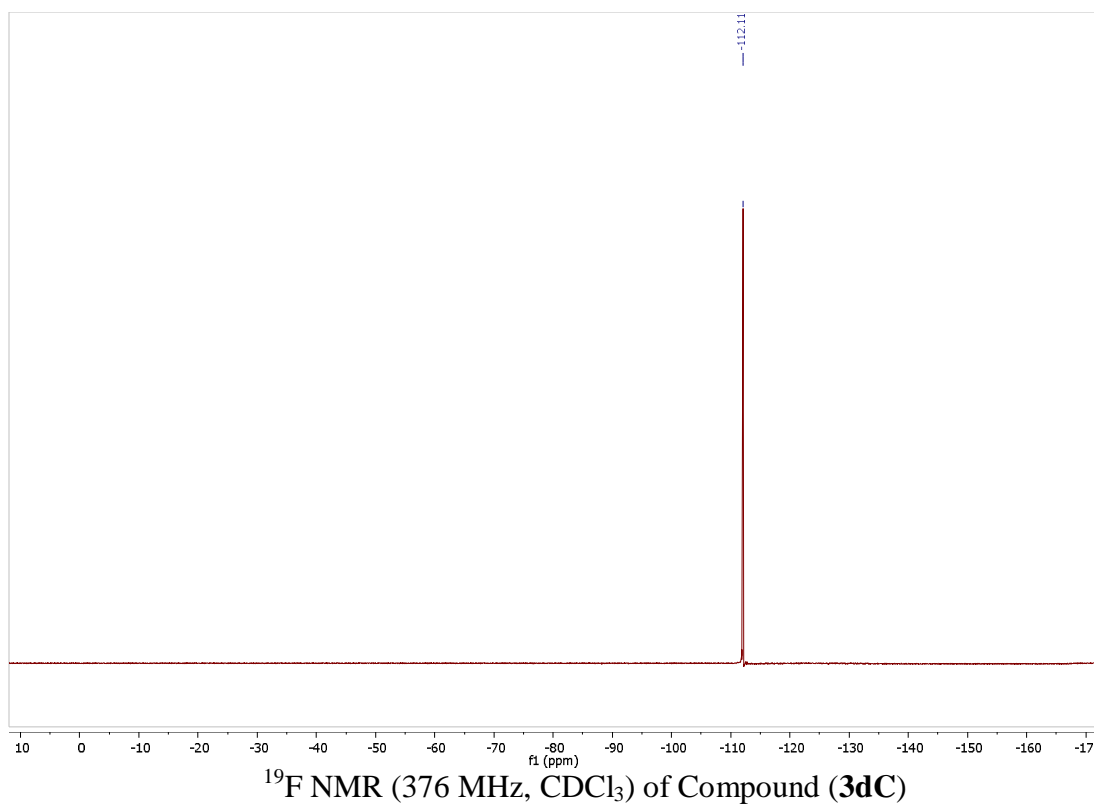

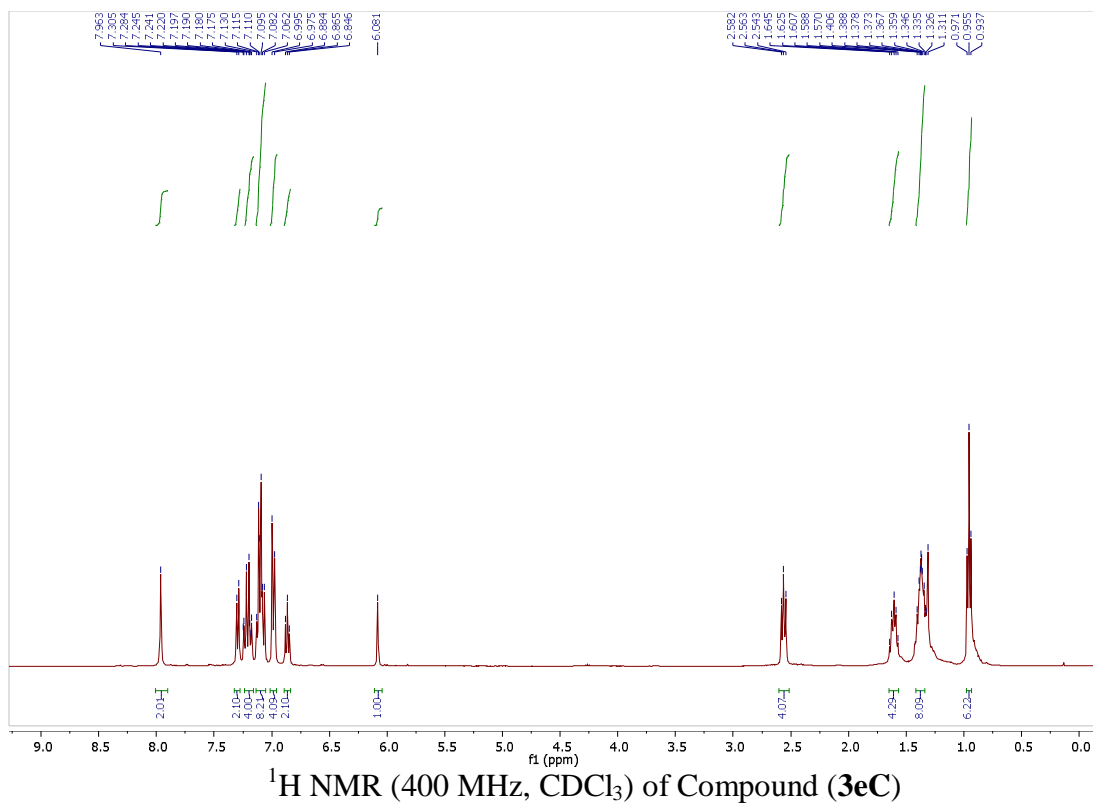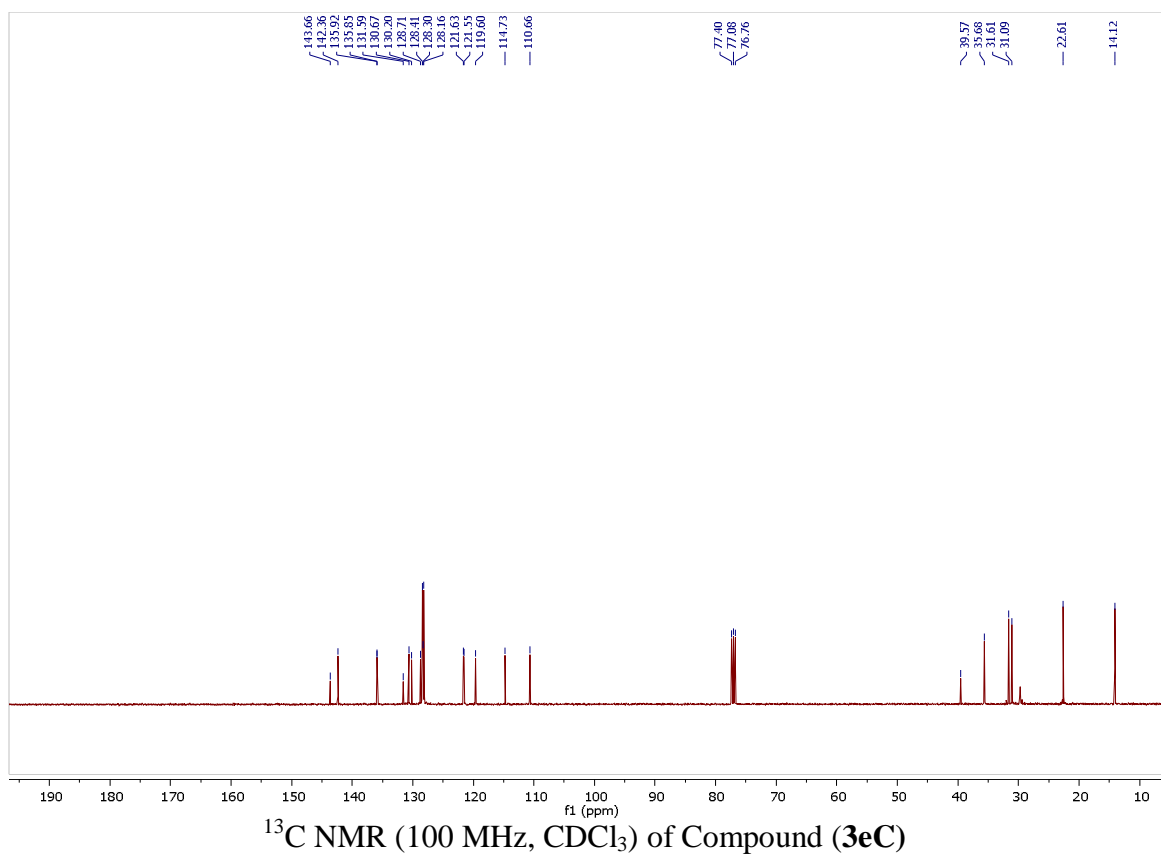

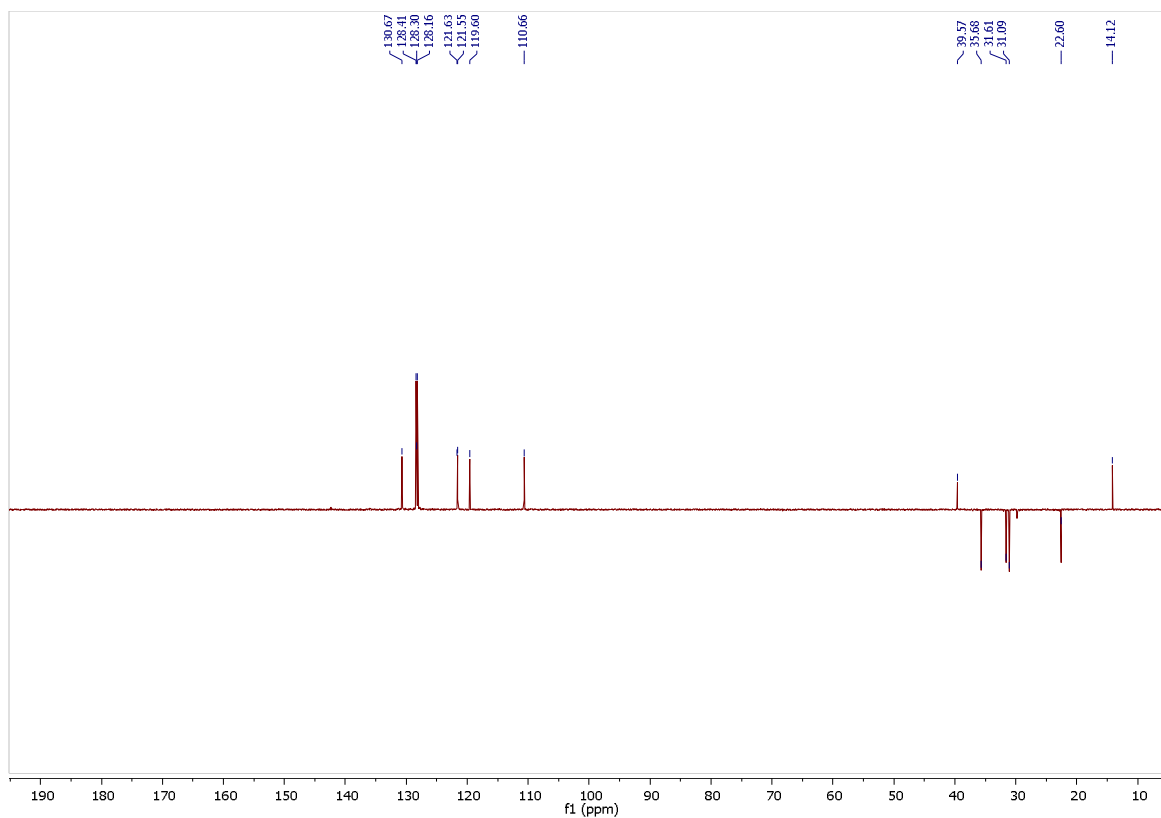

DEPT NMR (125 MHz, CDCl<sub>3</sub>) of Compound (**3eC**)

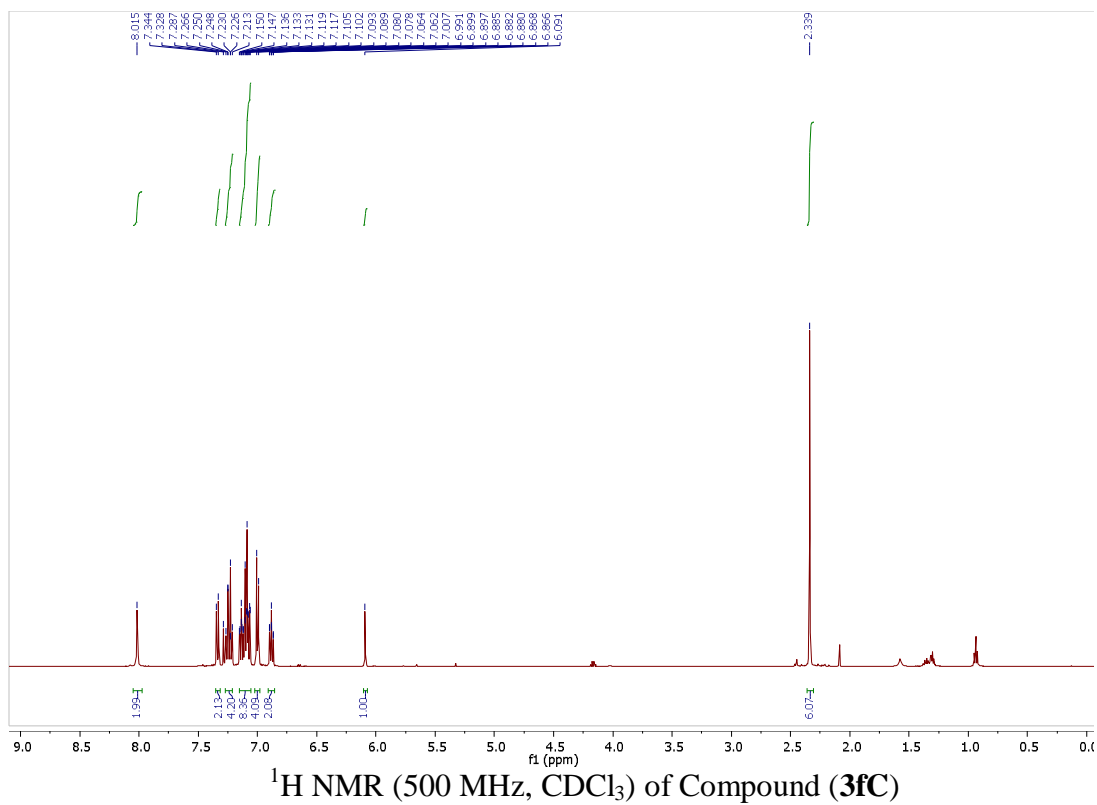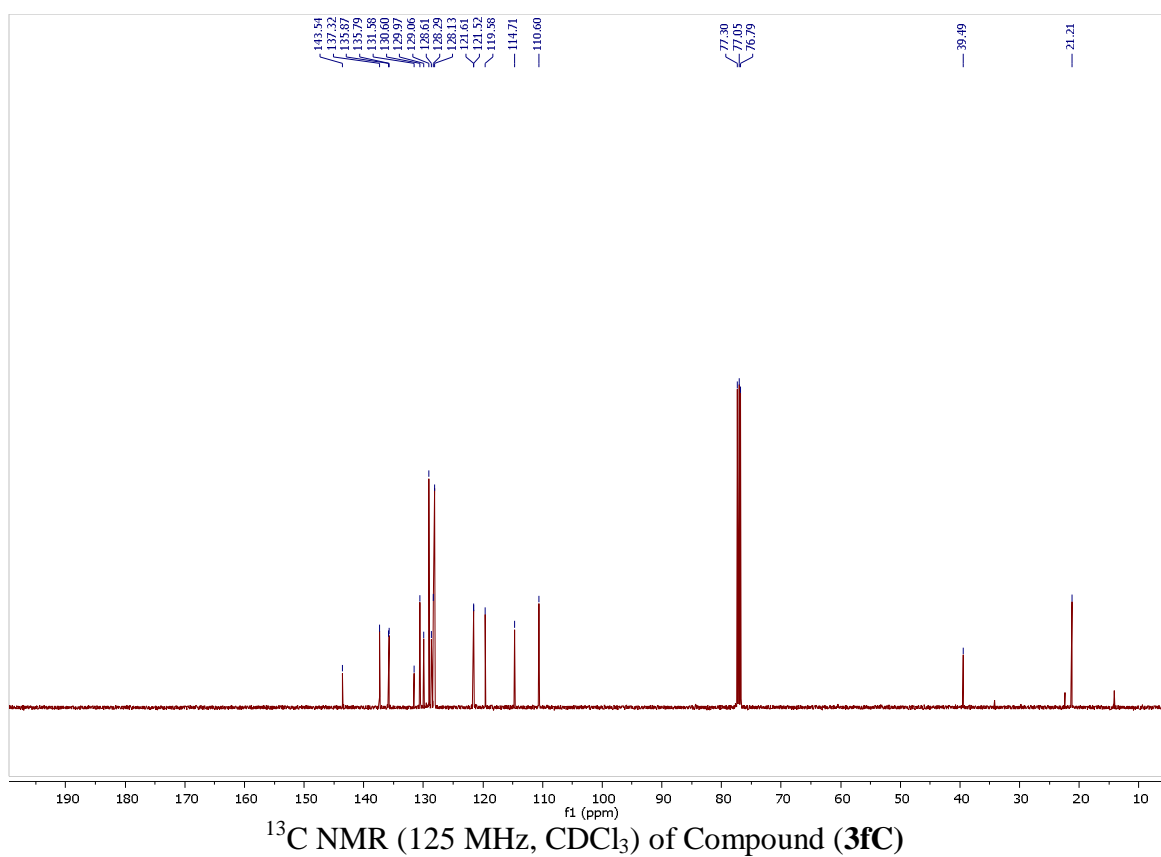

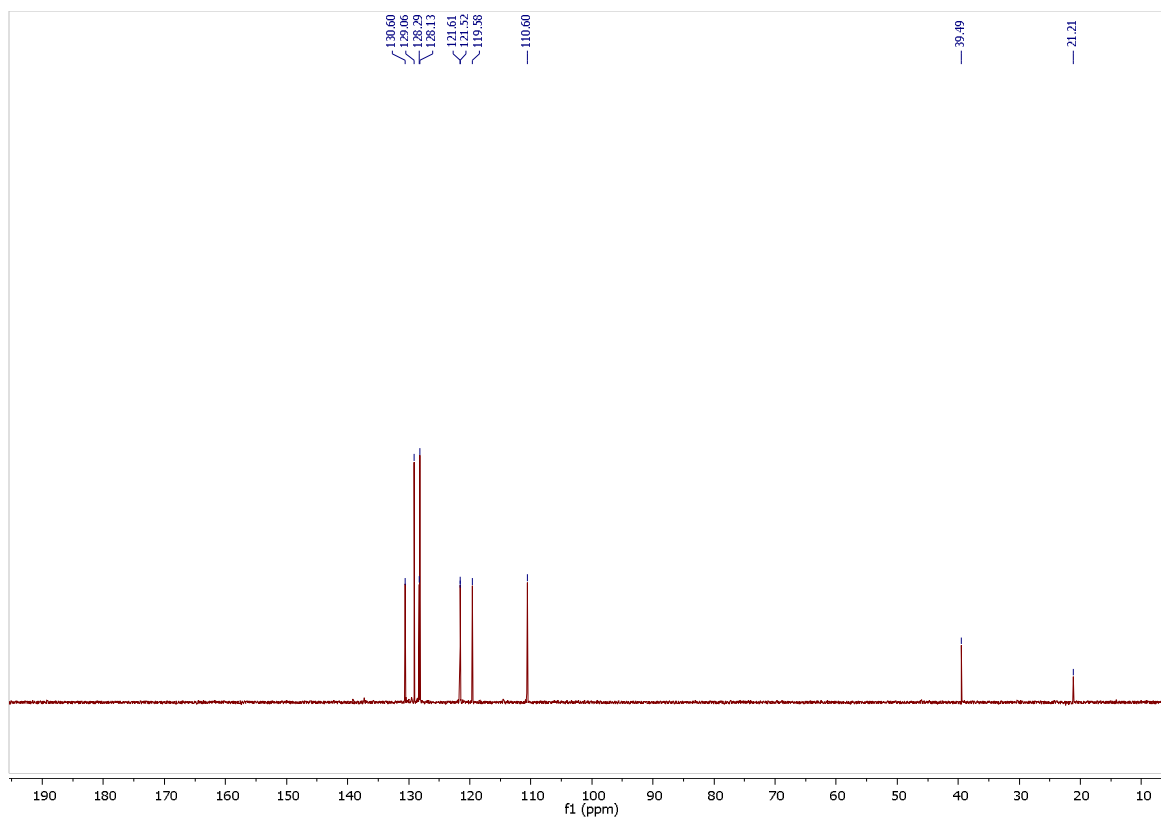

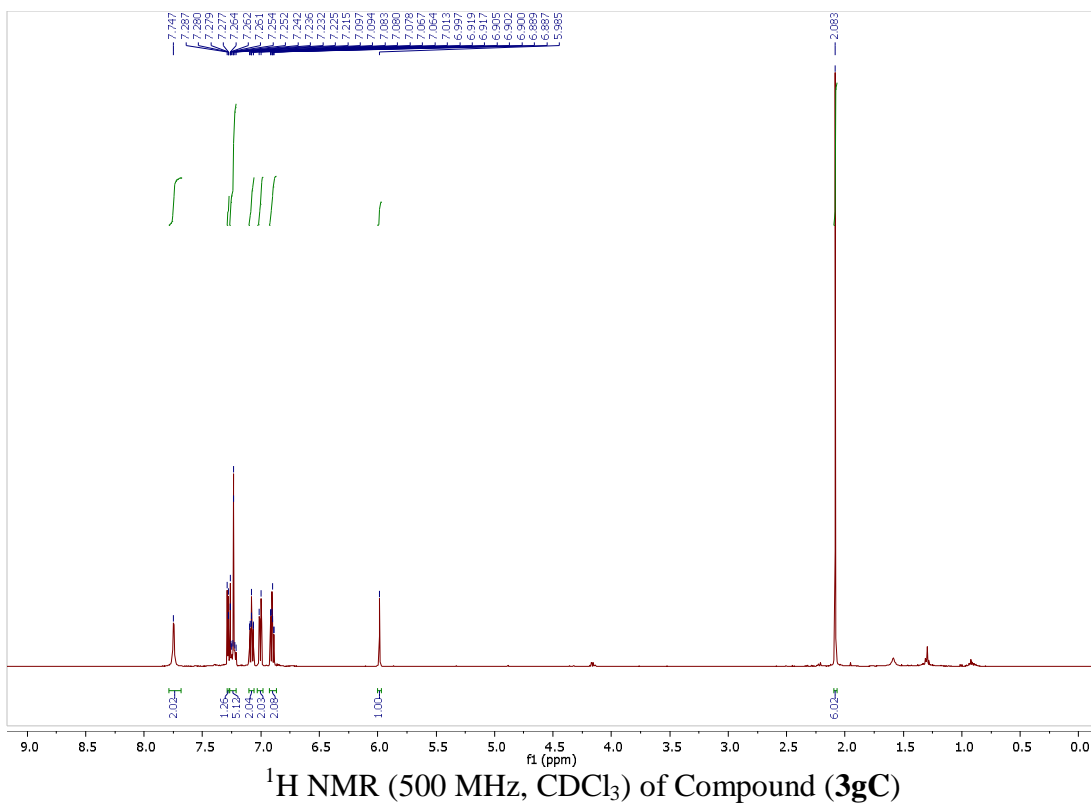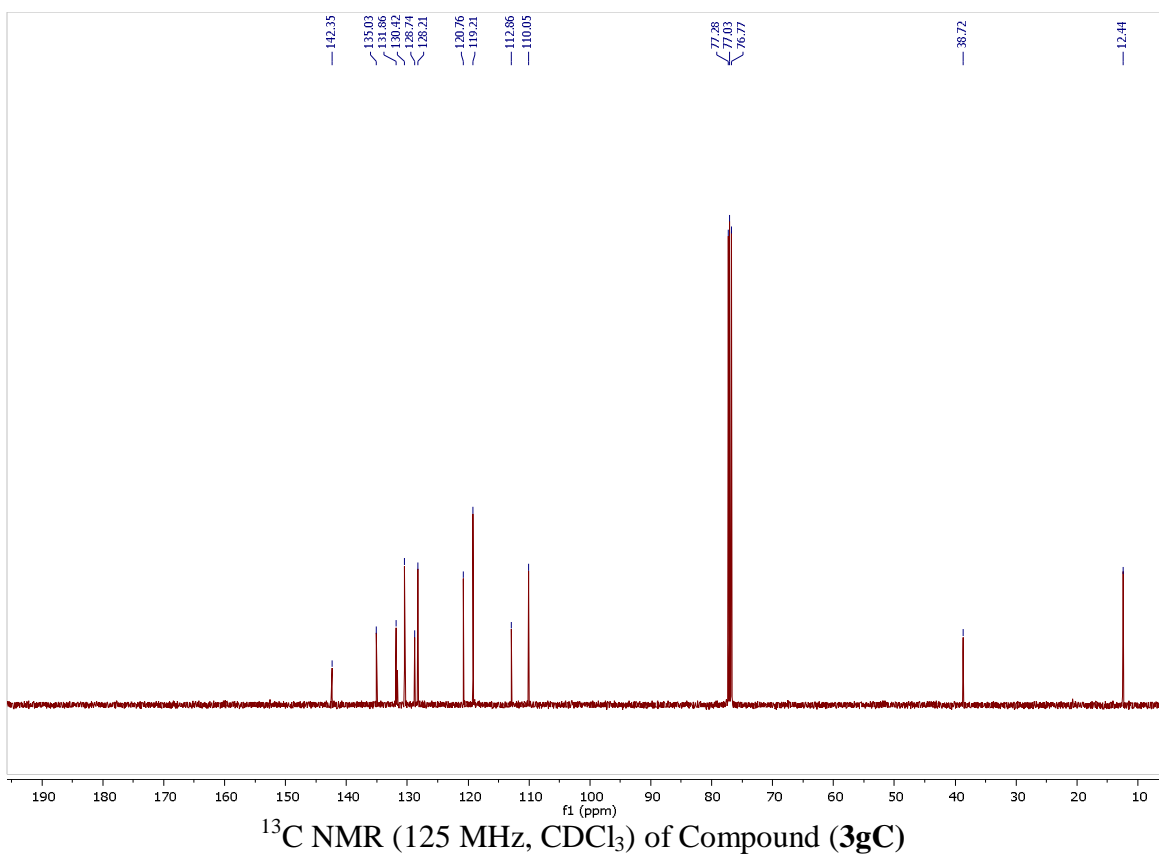

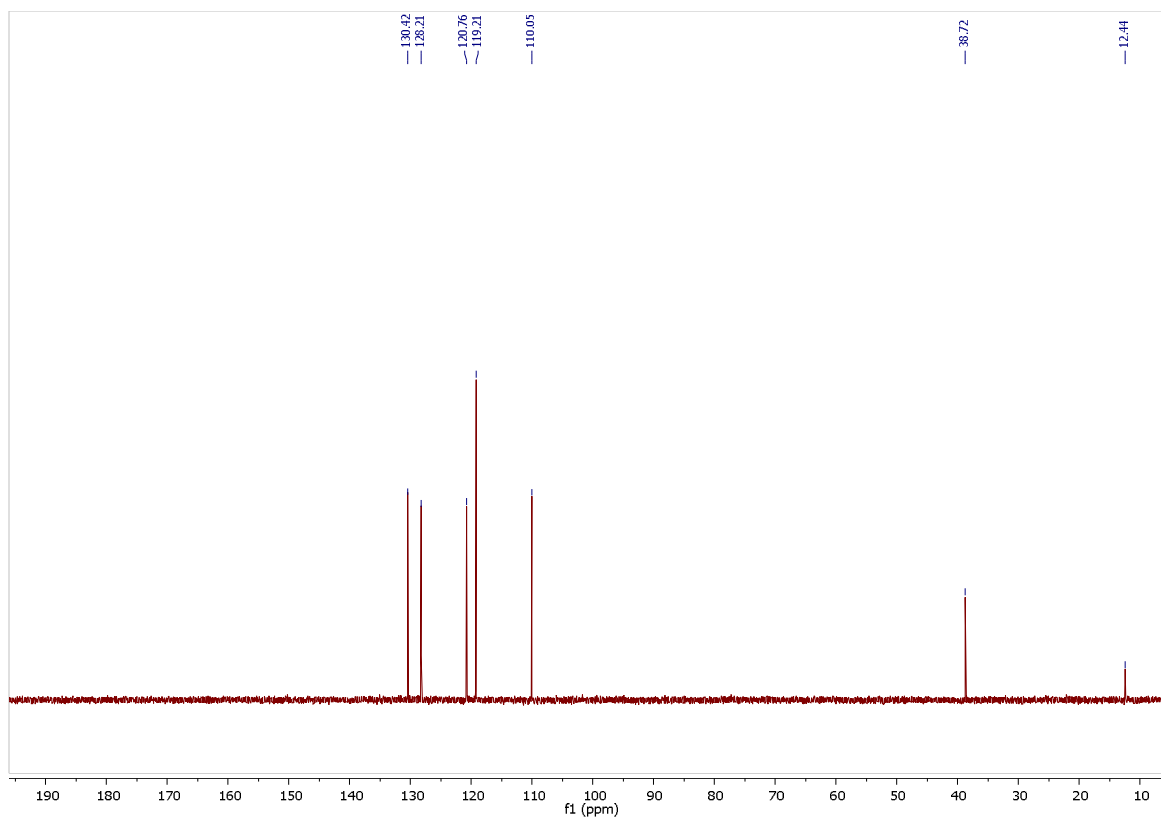

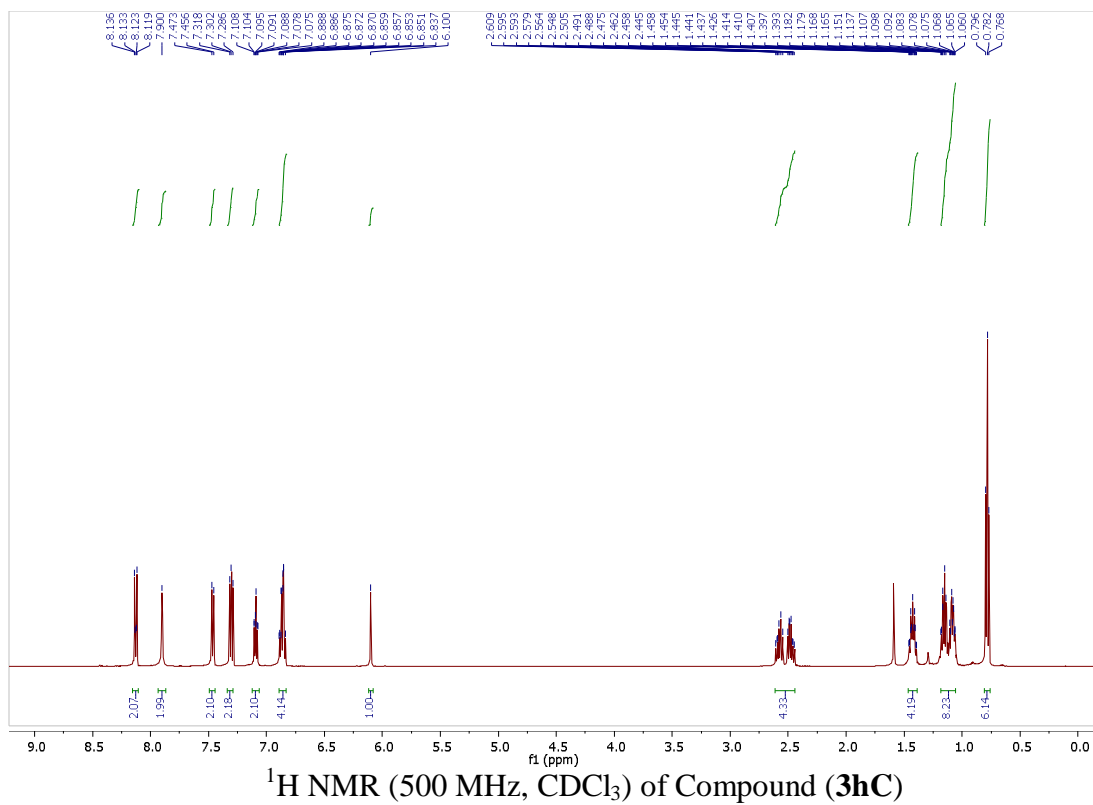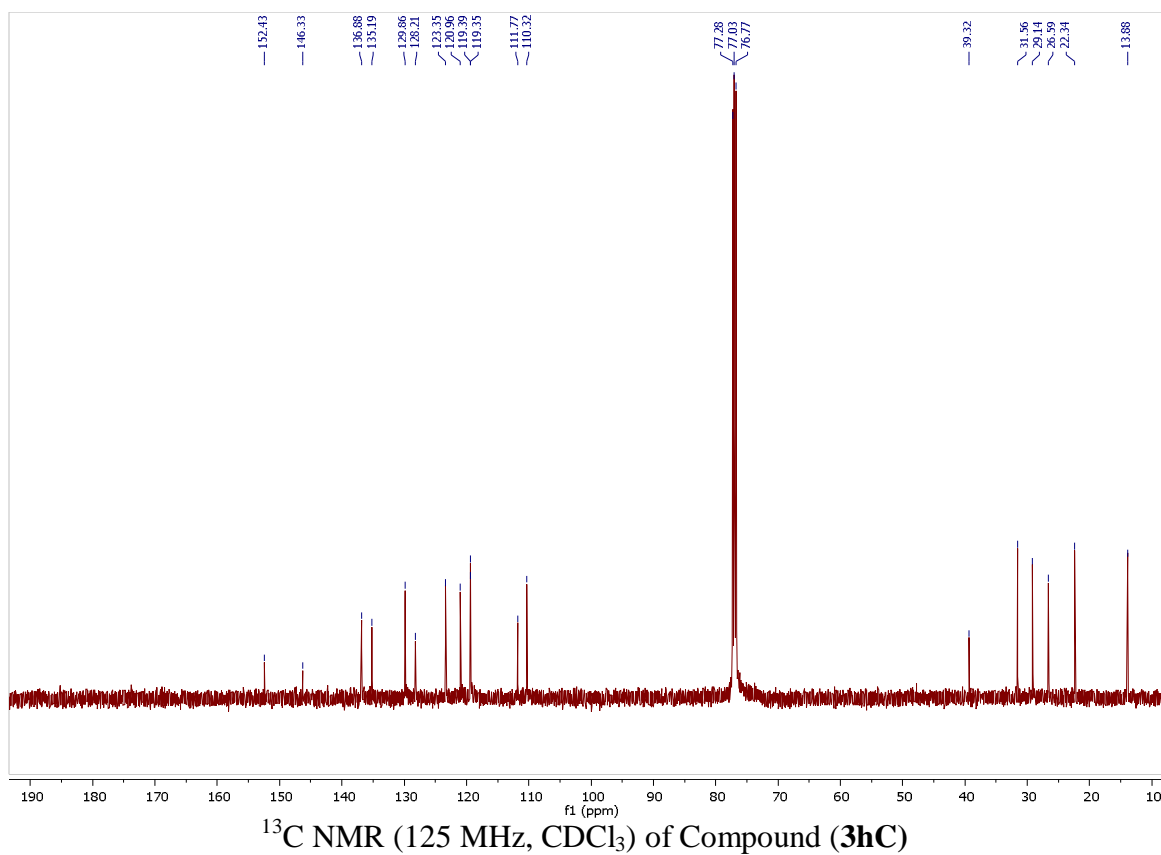

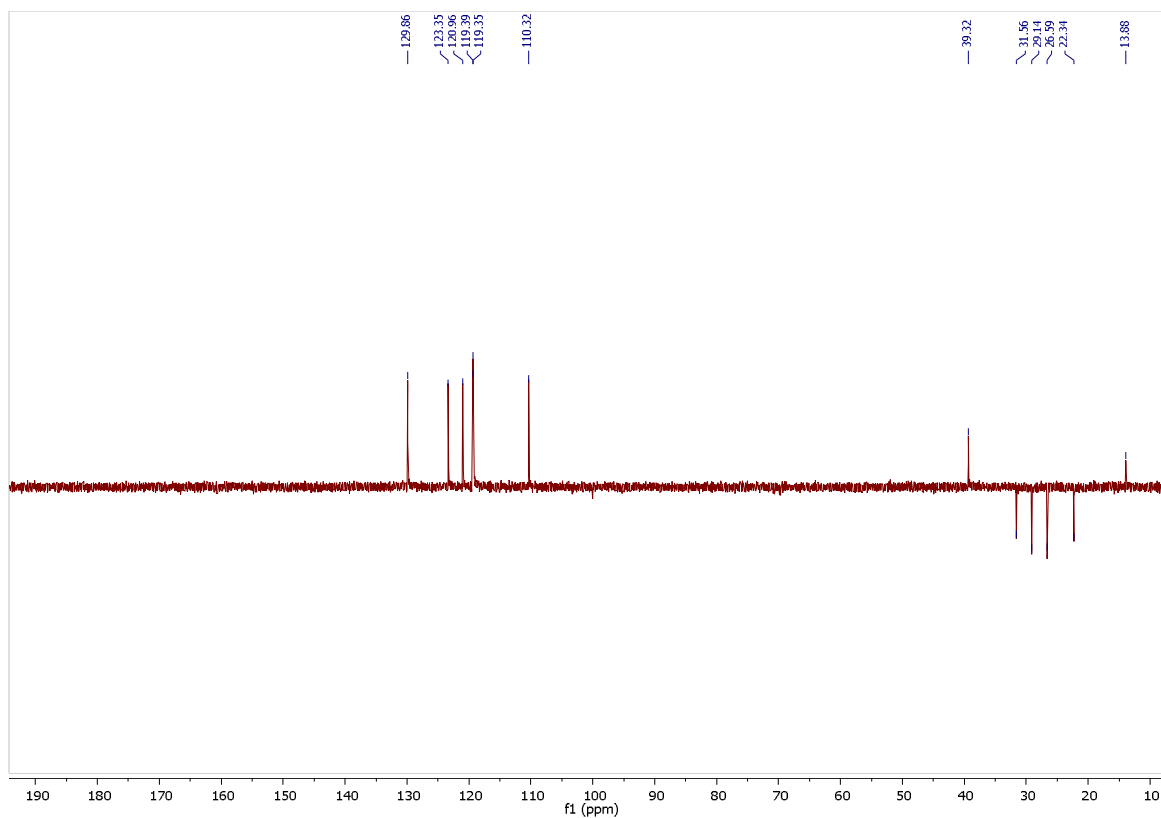

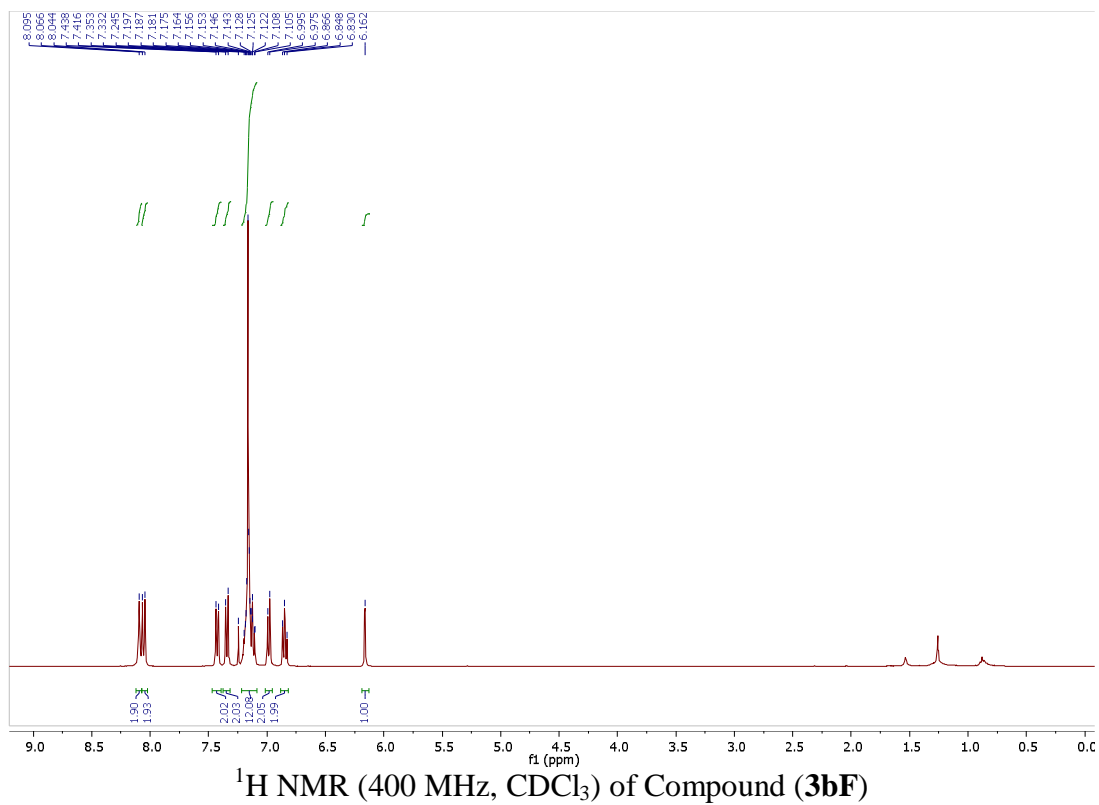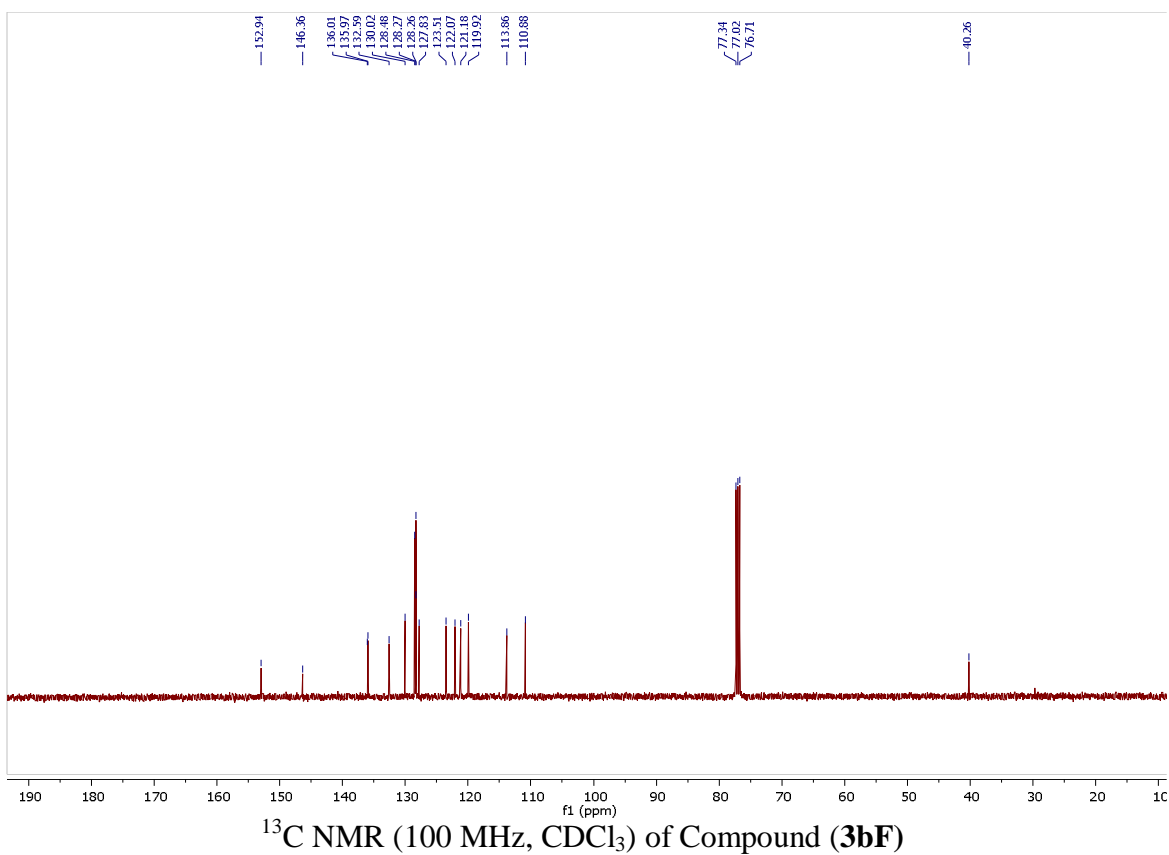

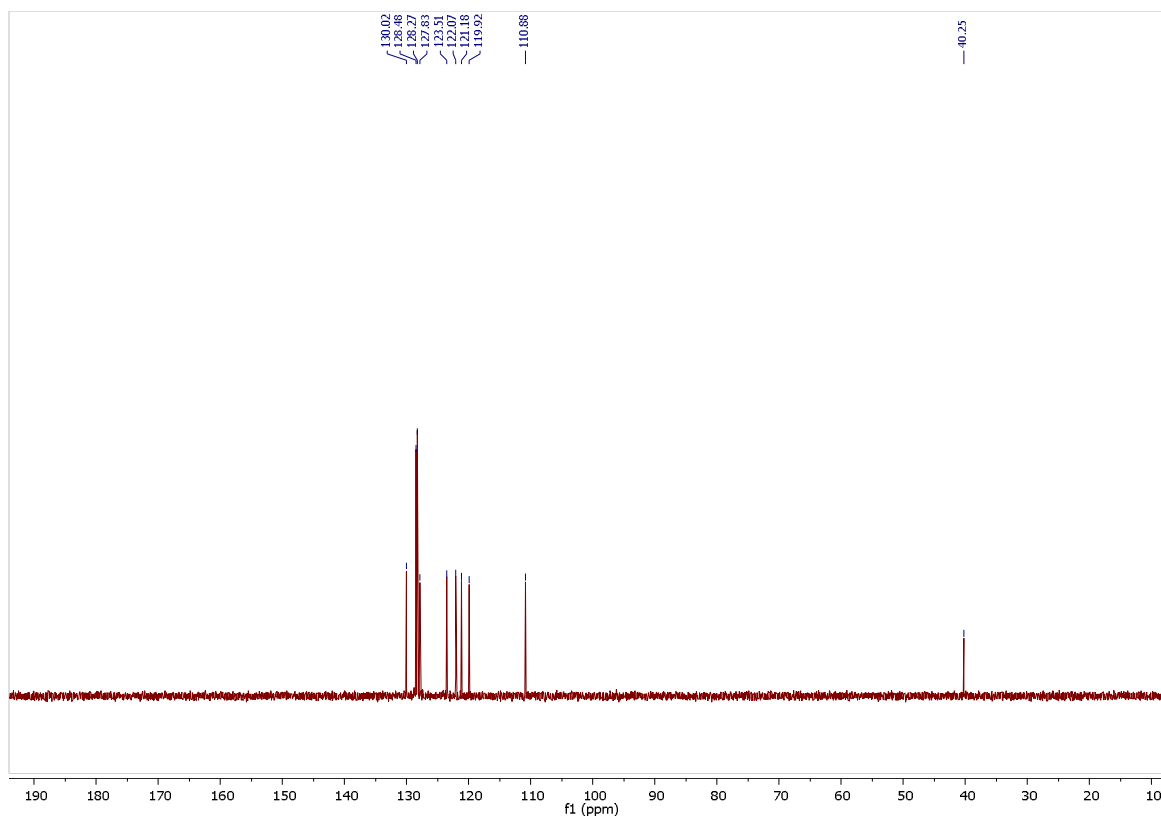

DEPT NMR (125 MHz,  $\text{CDCl}_3$ ) of Compound (**3bF**)

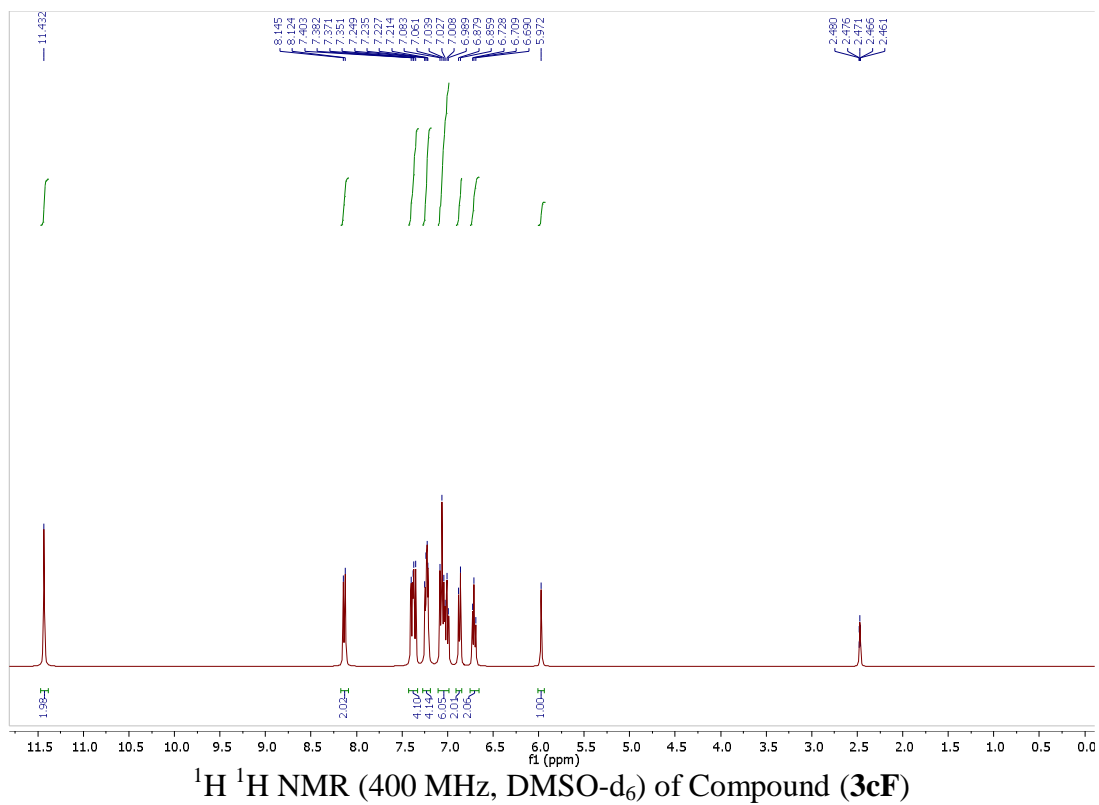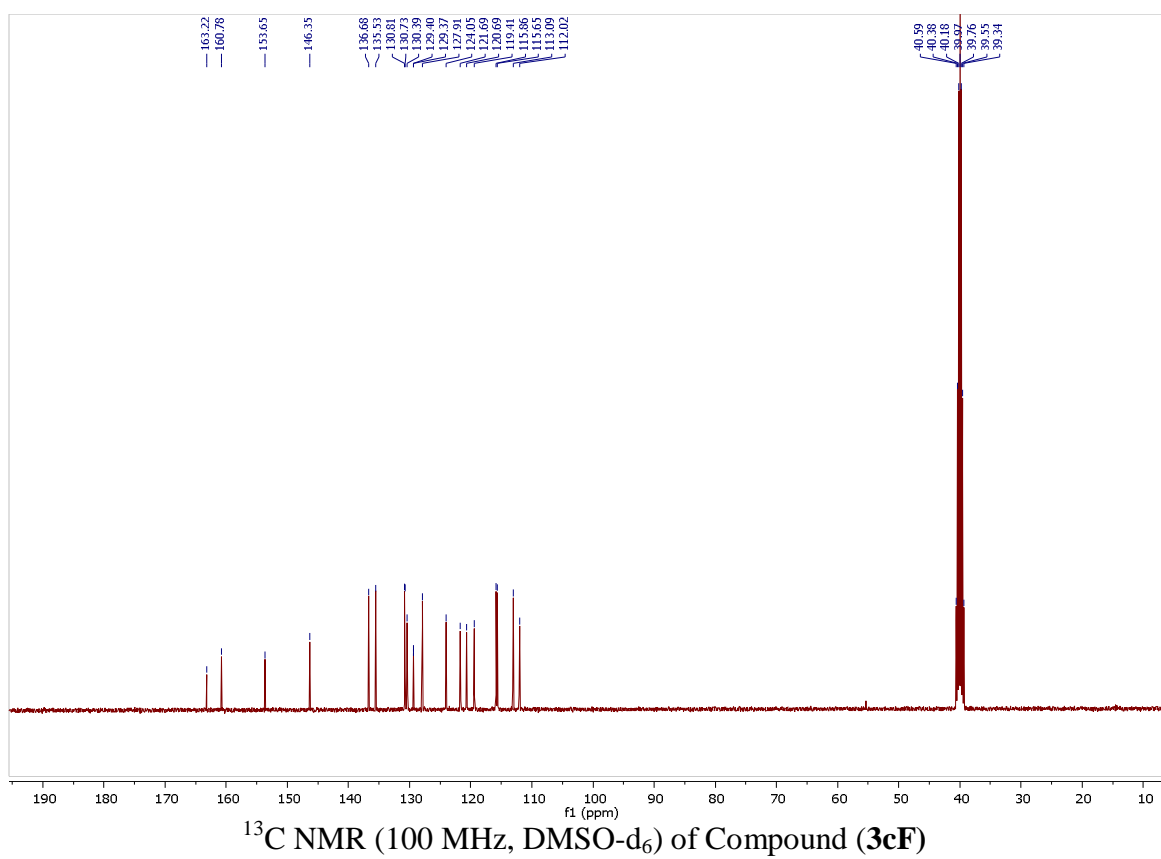

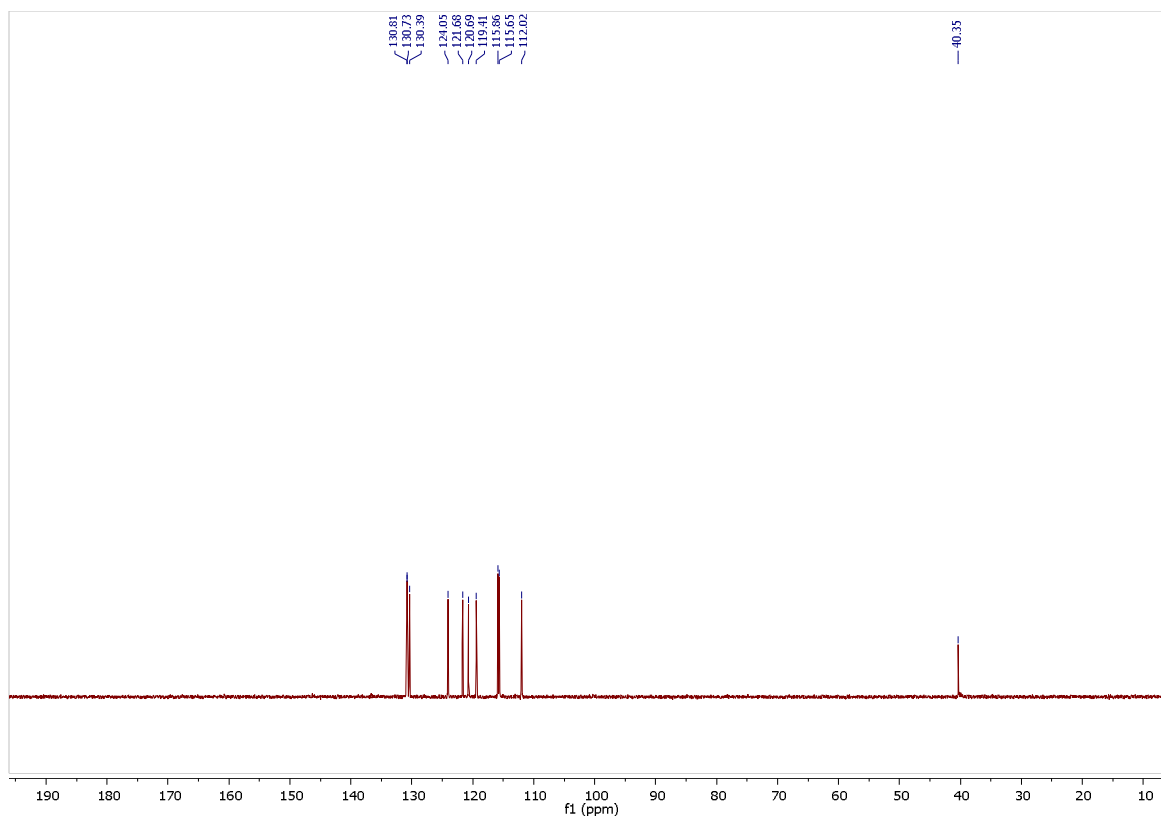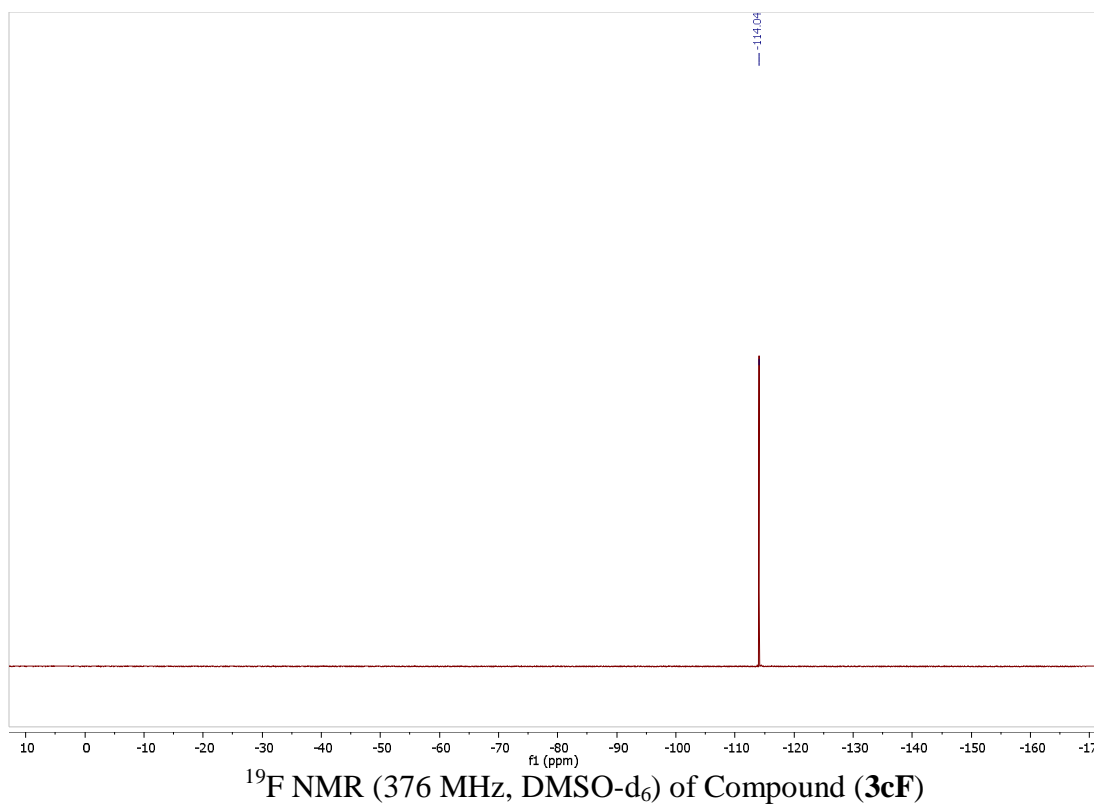

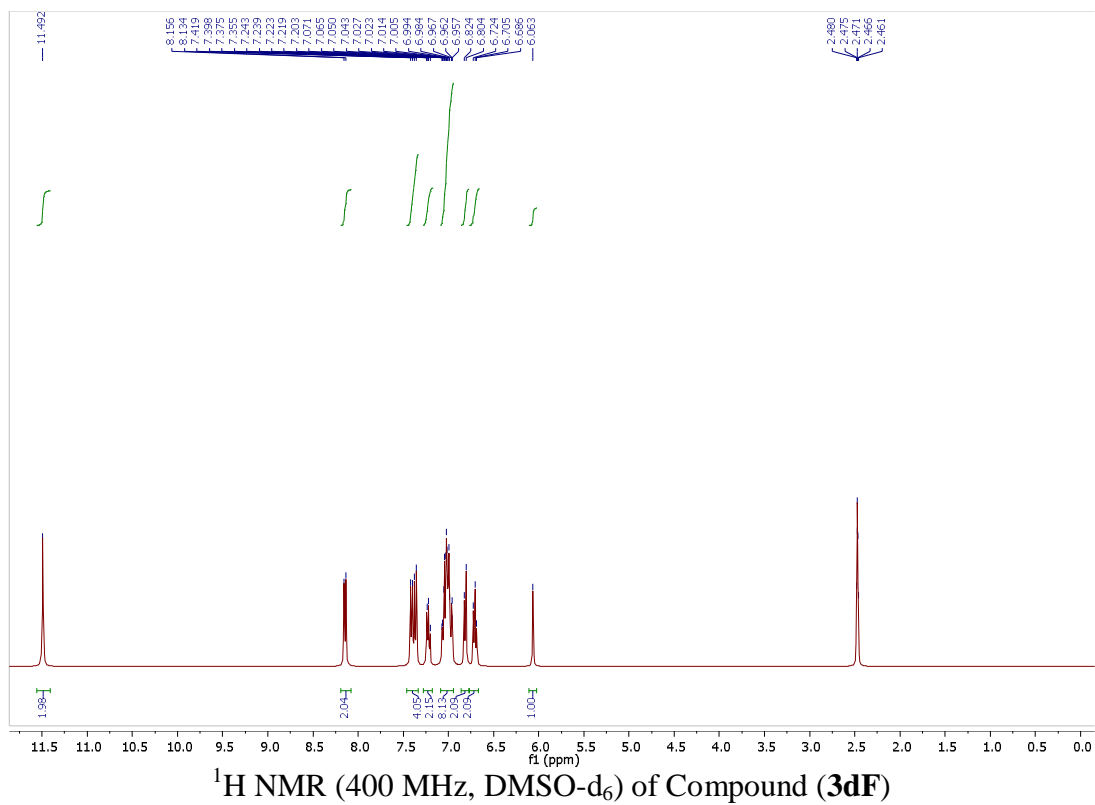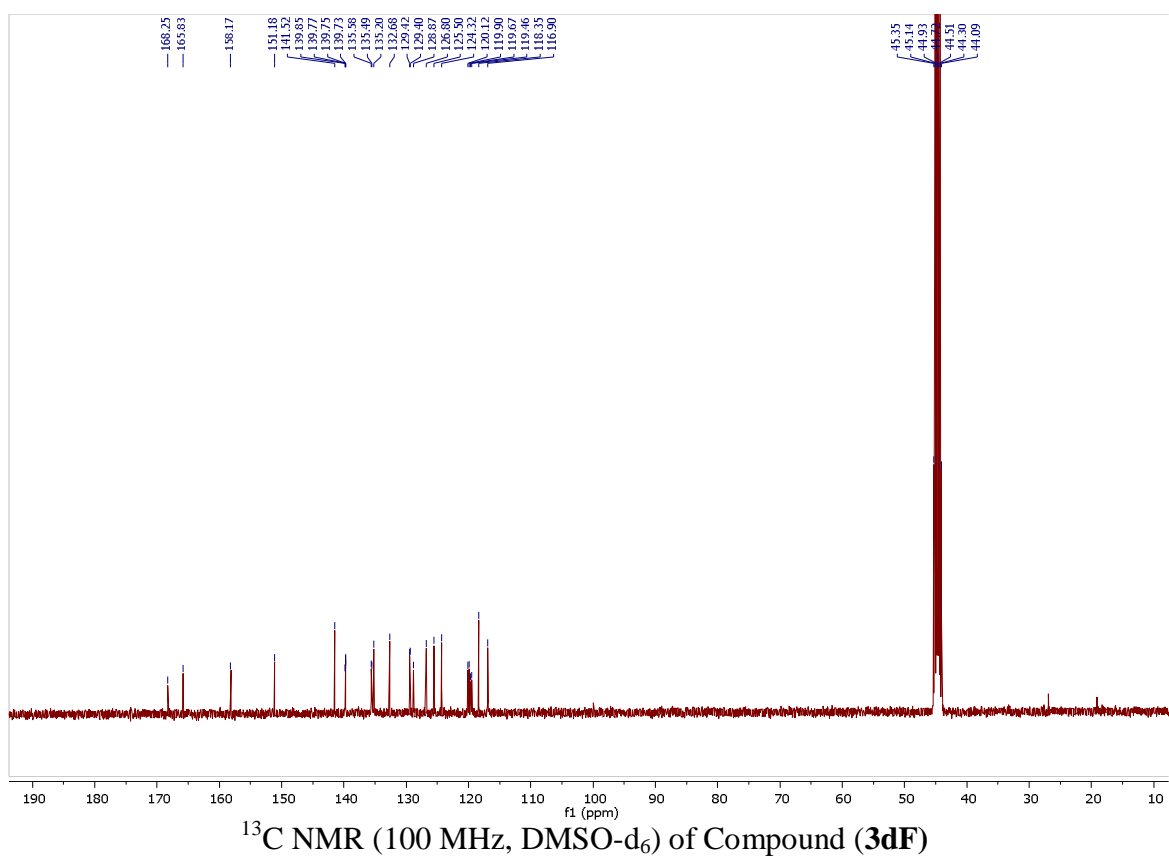

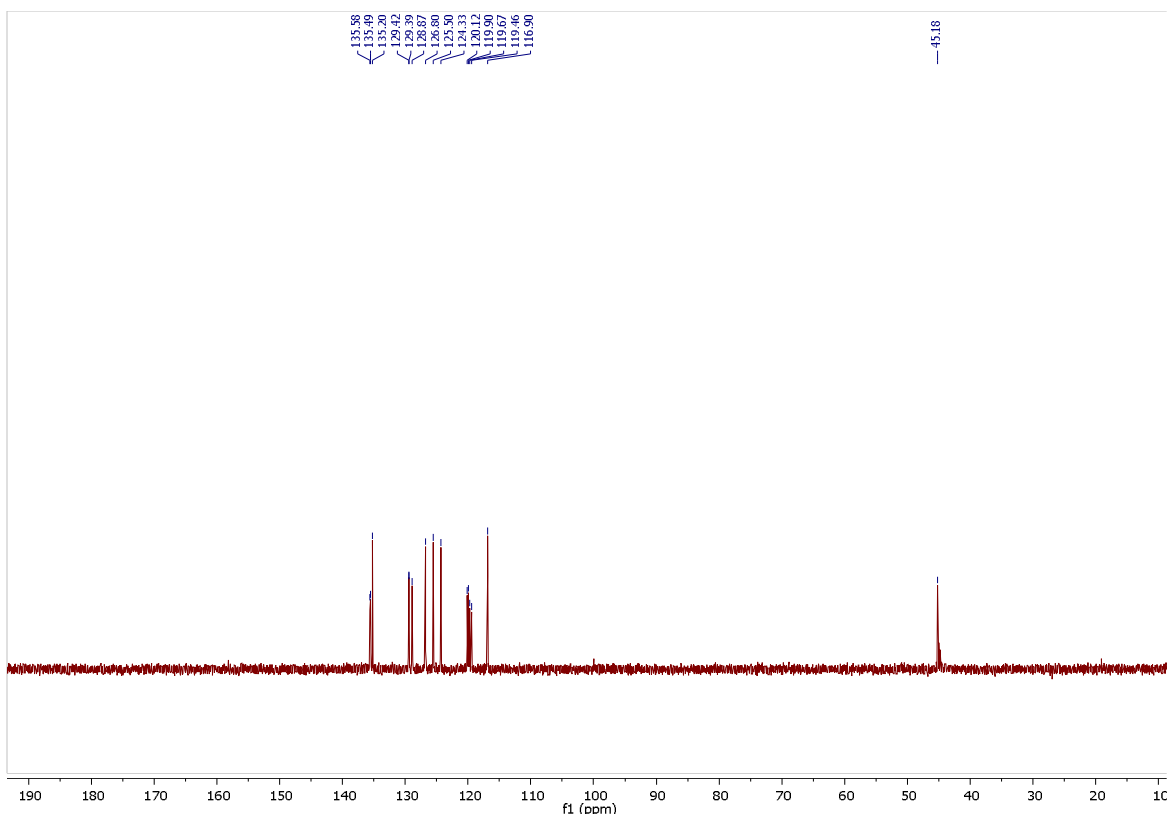

DEPT NMR (100 MHz, DMSO-d<sub>6</sub>) of Compound (3dF)

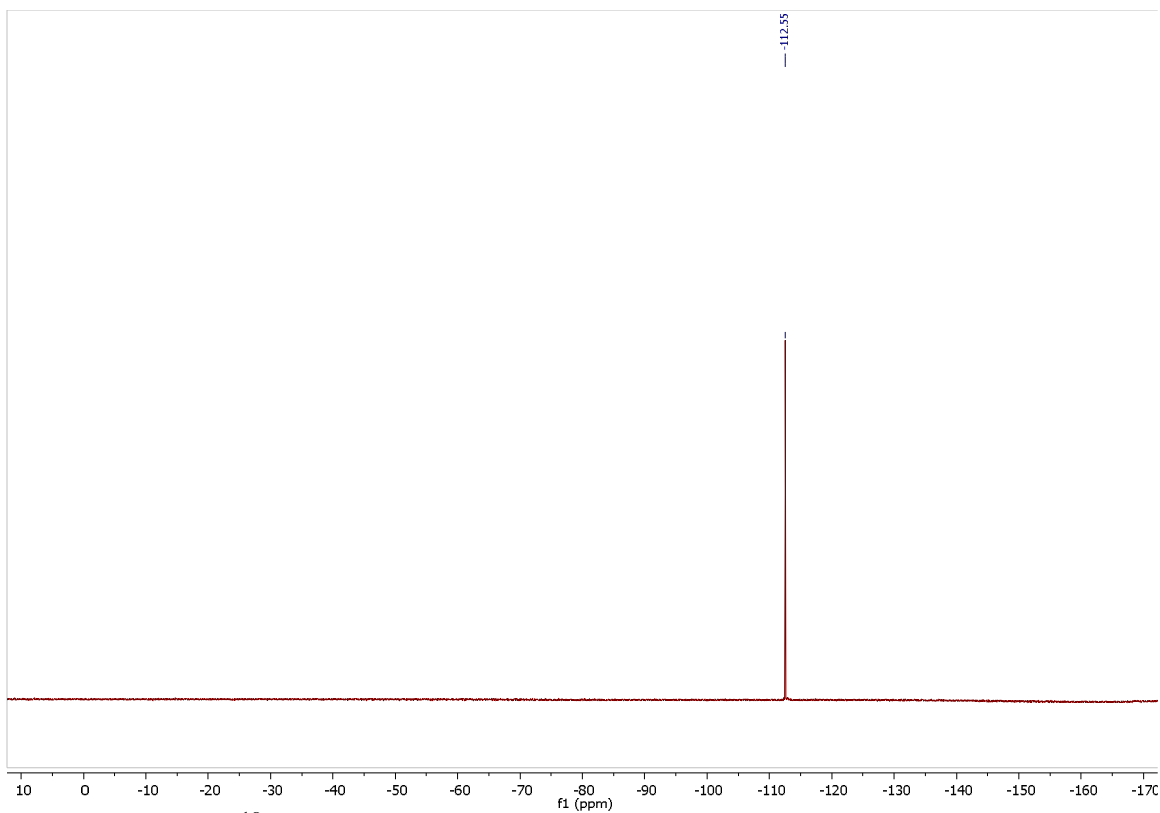

<sup>19</sup>F NMR (376 MHz, DMSO-d<sub>6</sub>) of Compound (3dF)

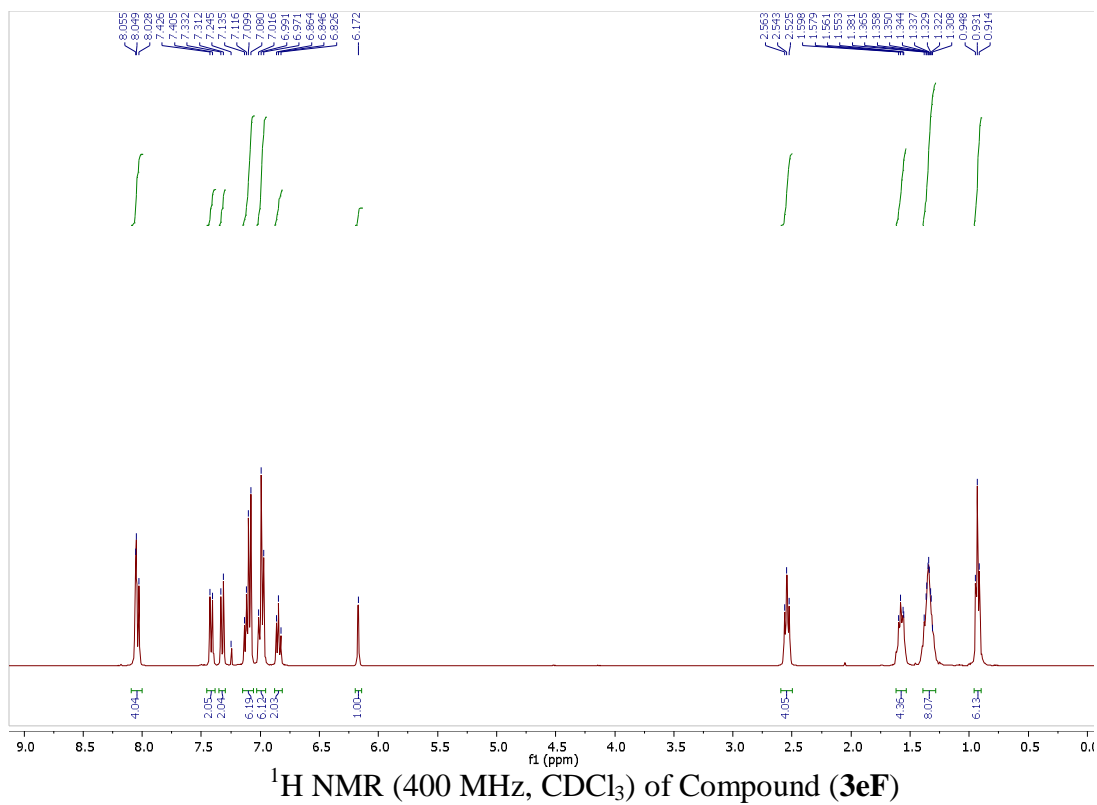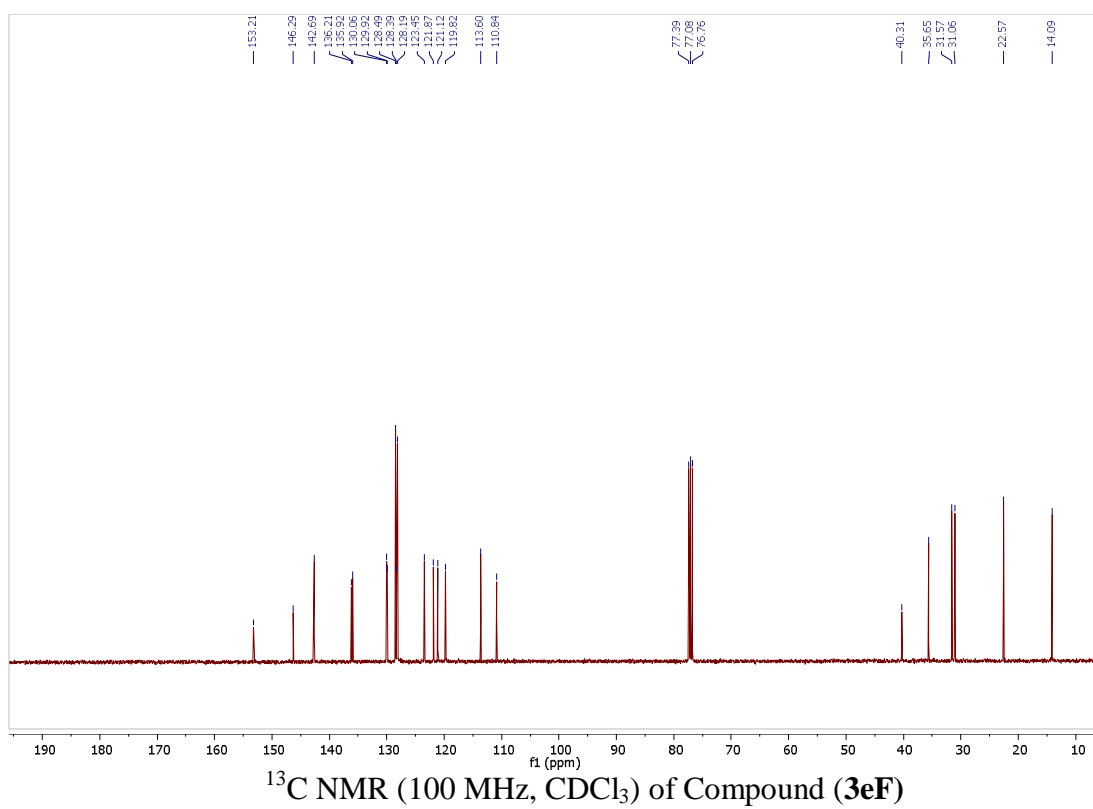

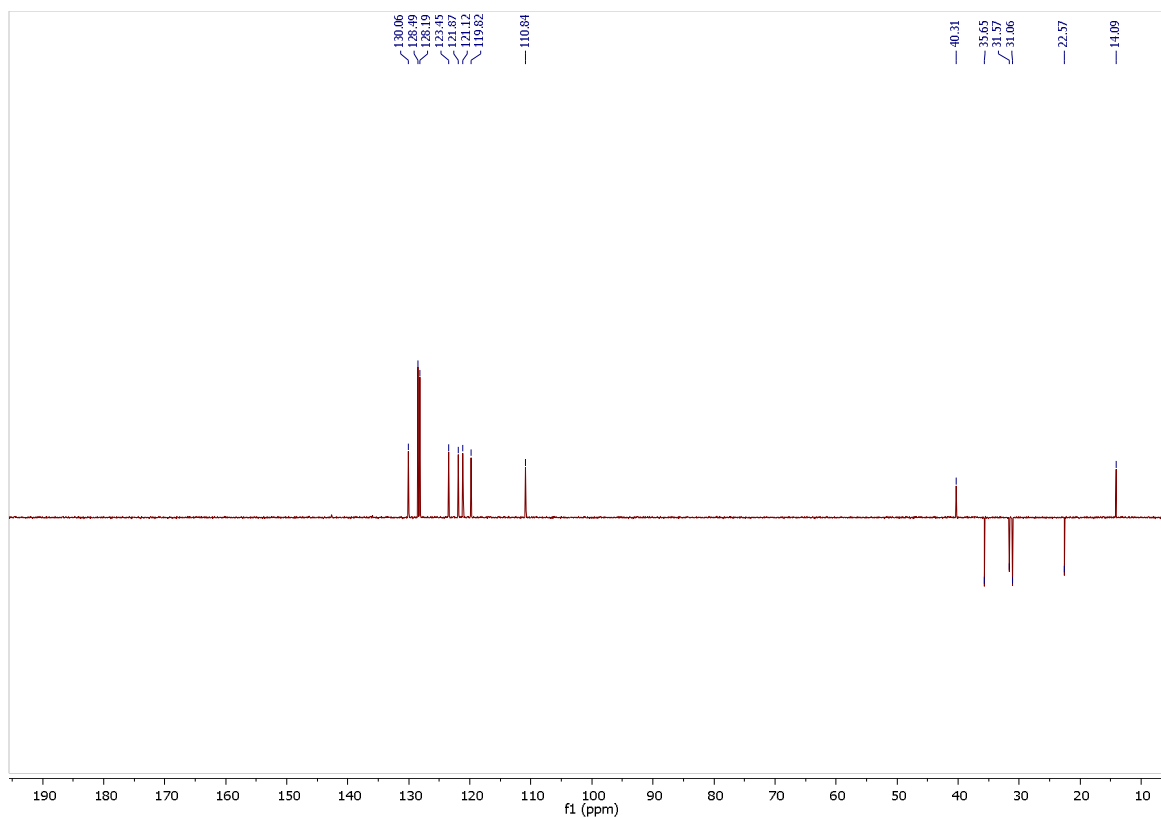

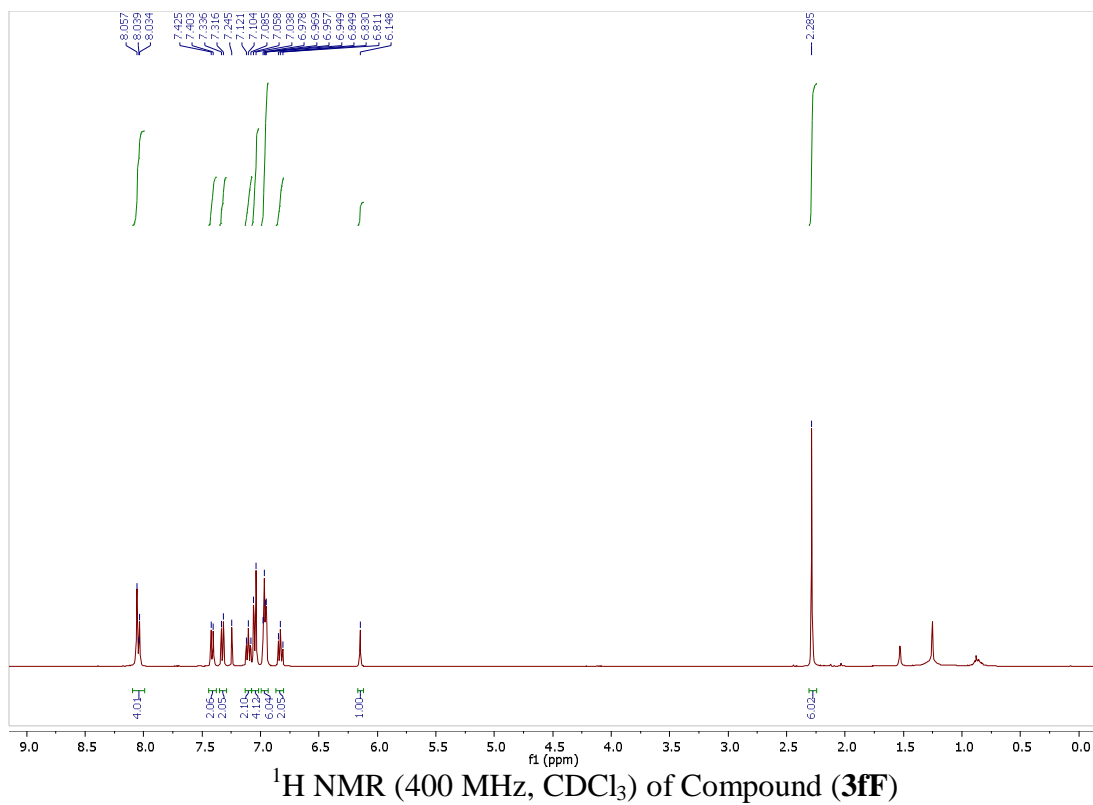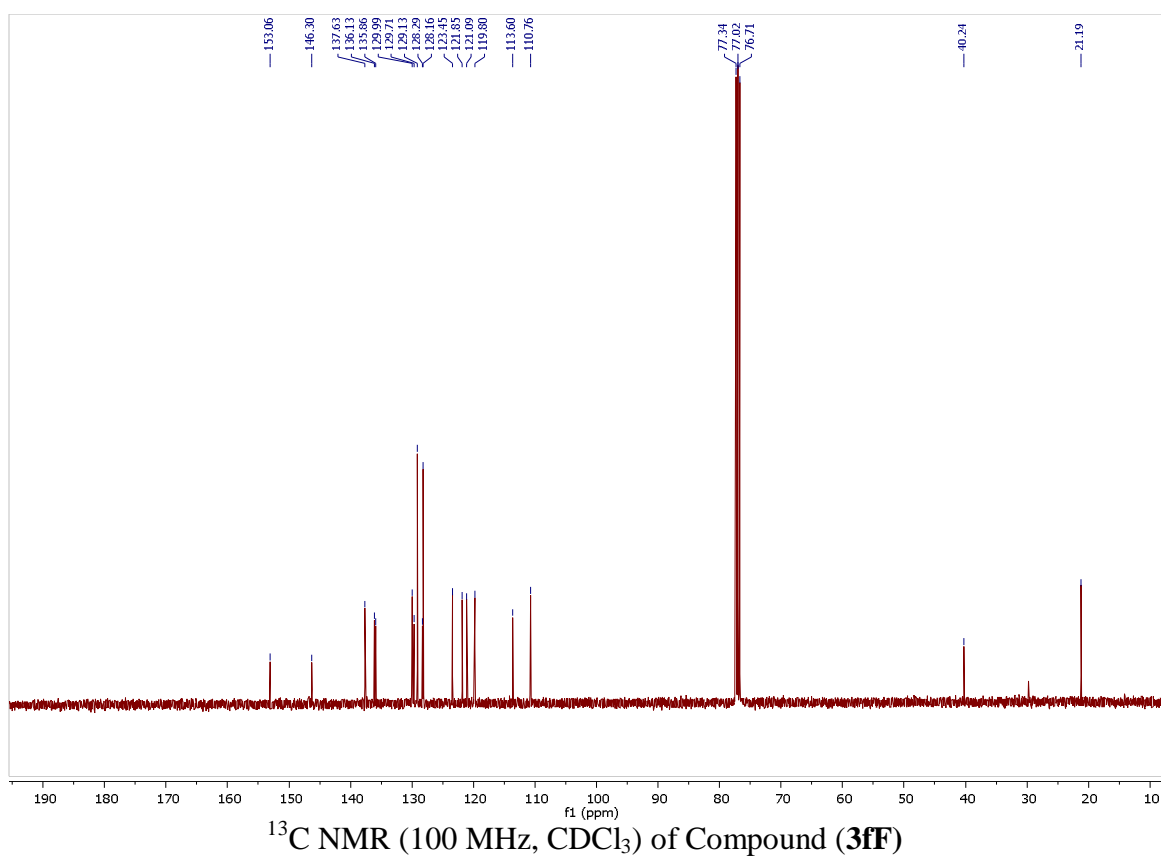

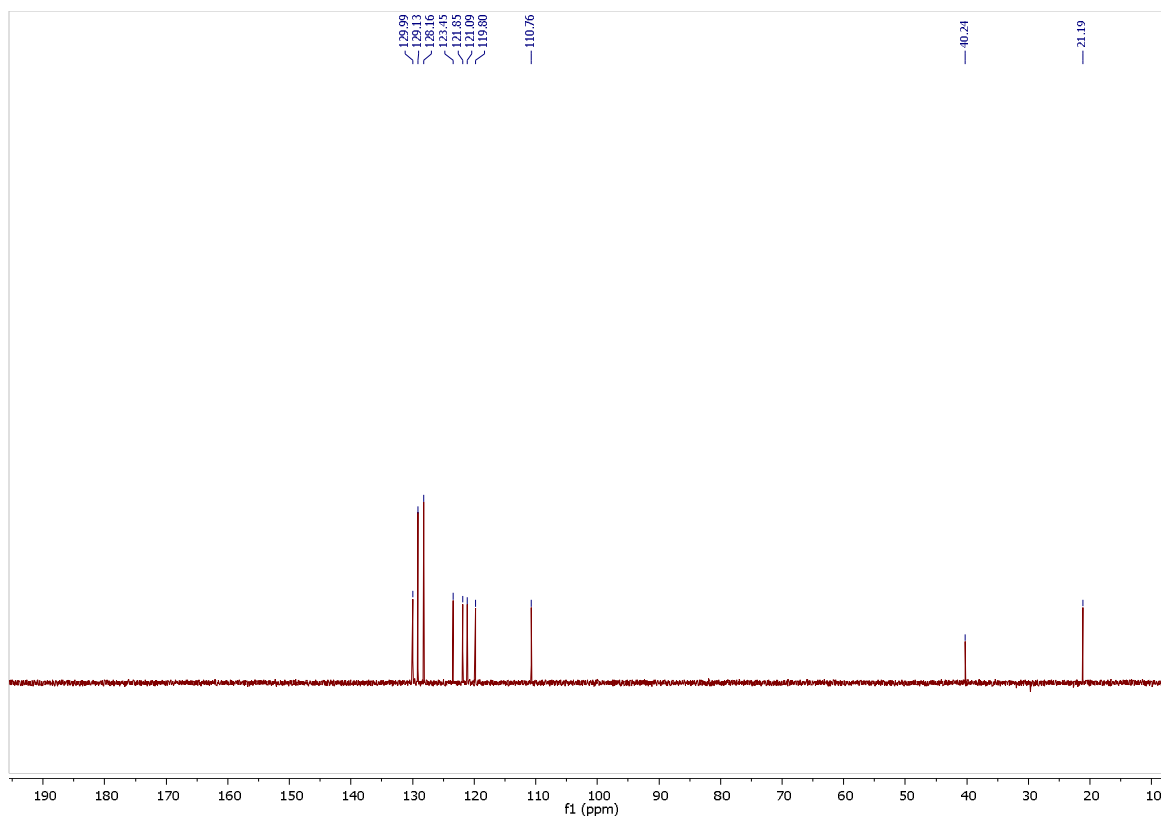

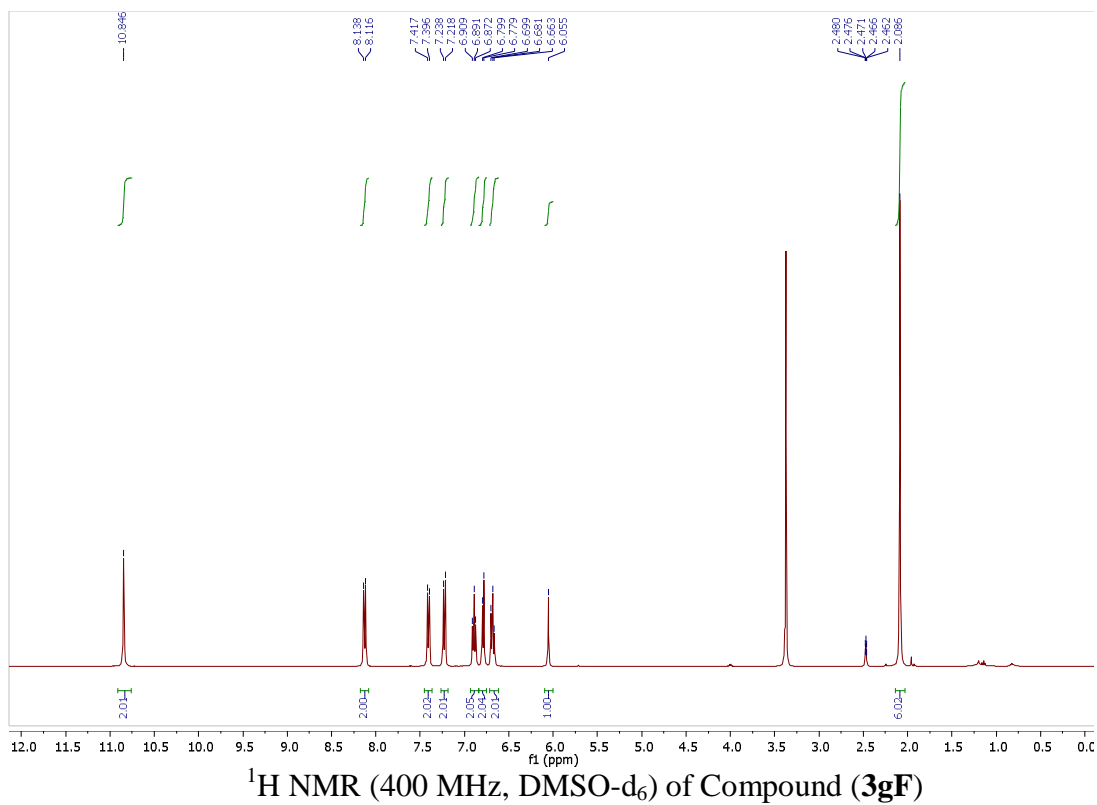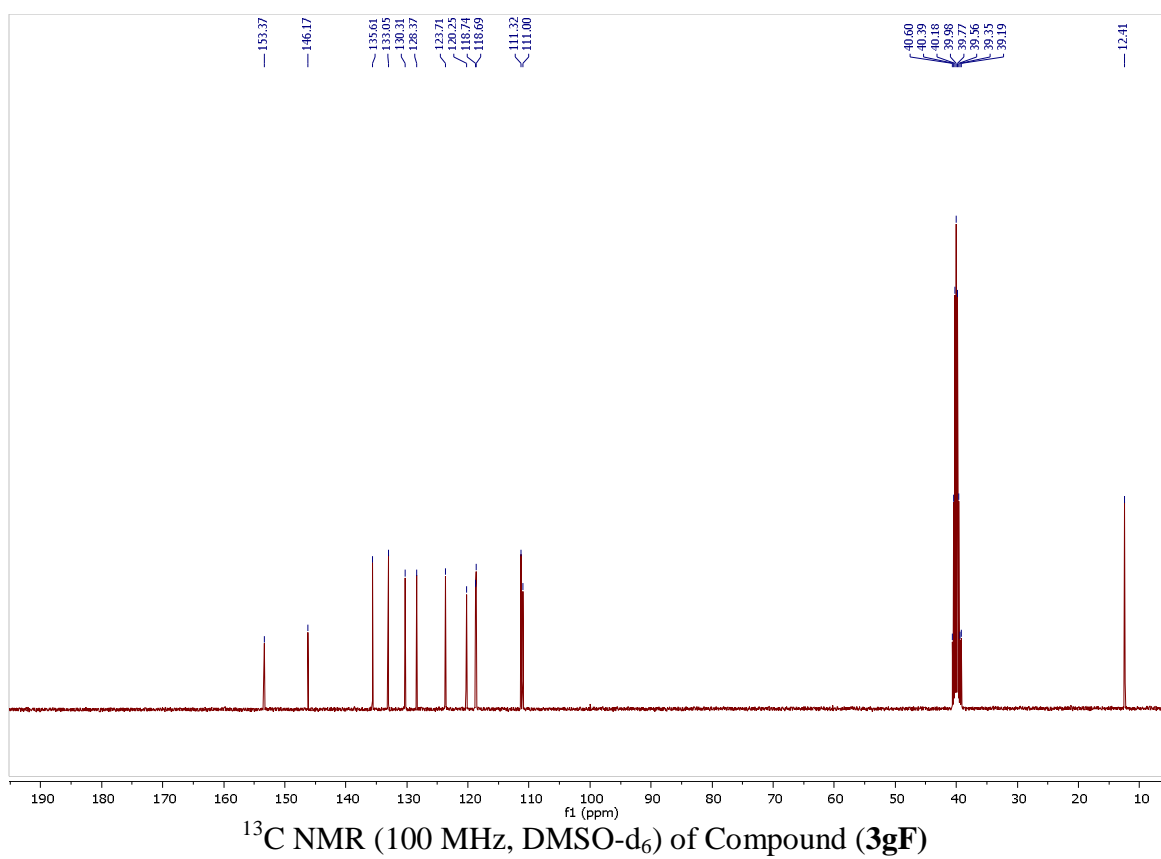

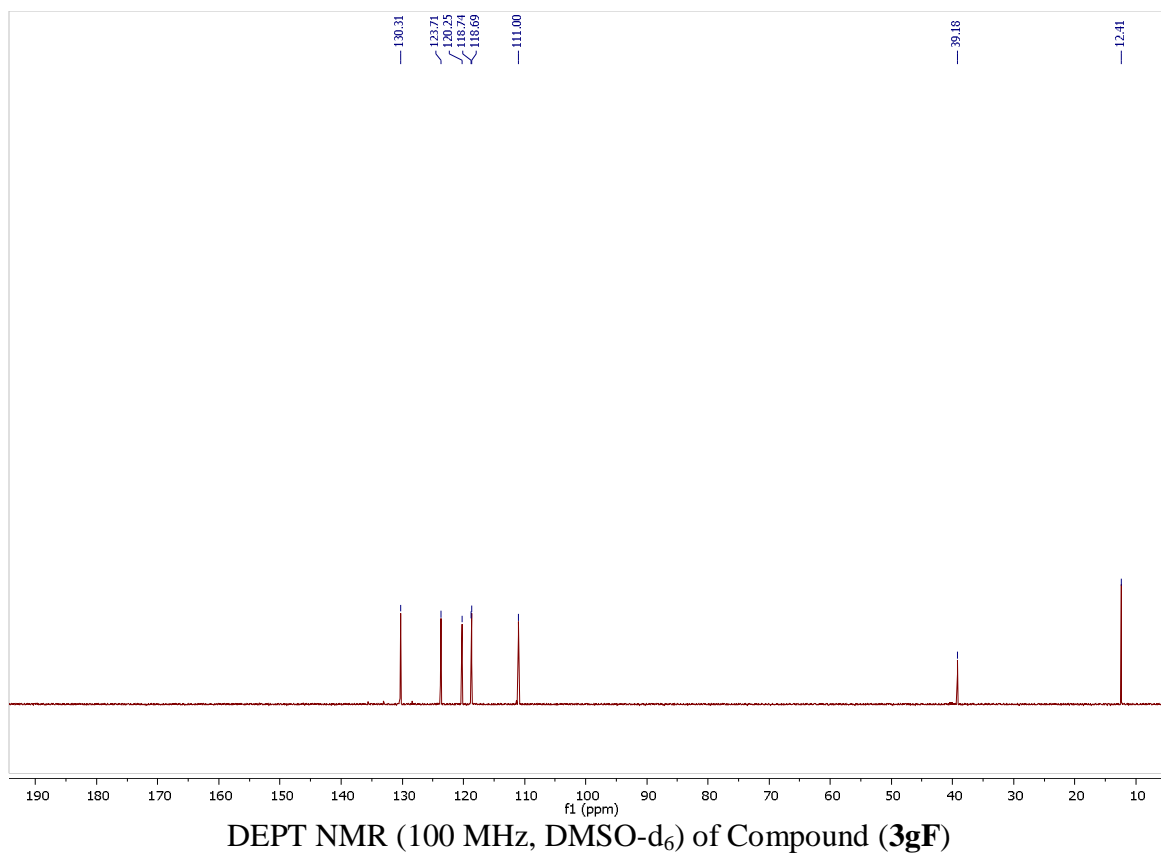

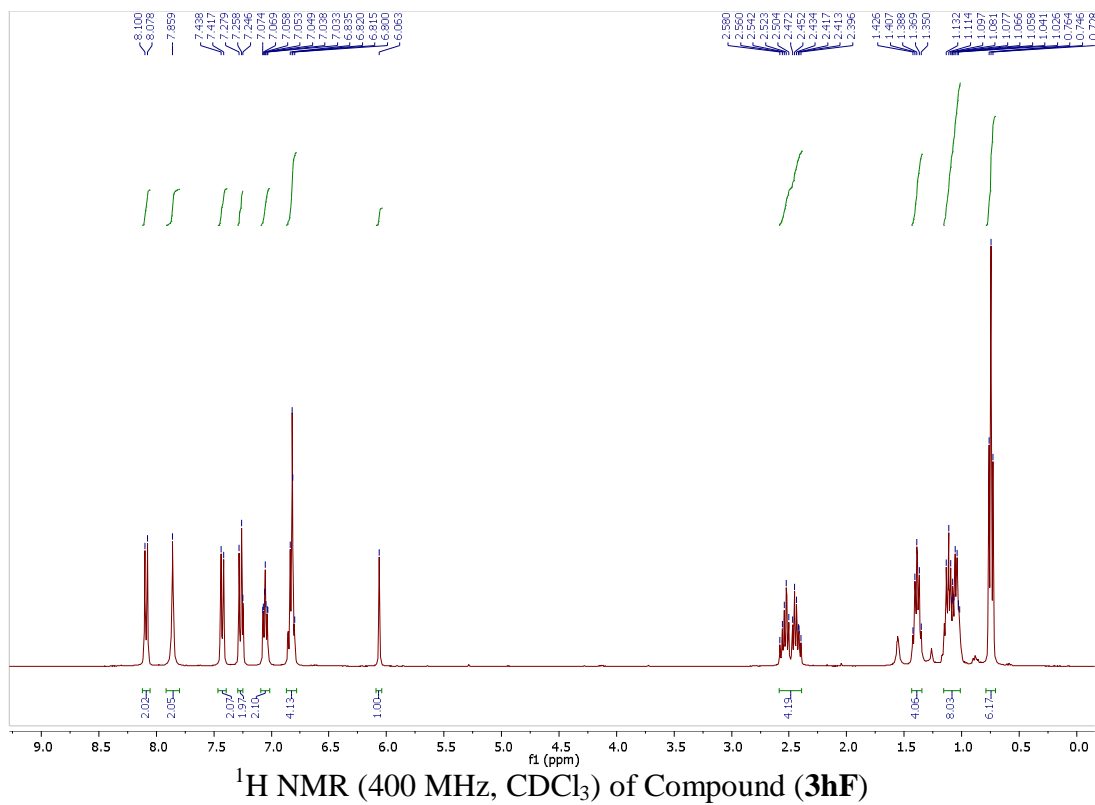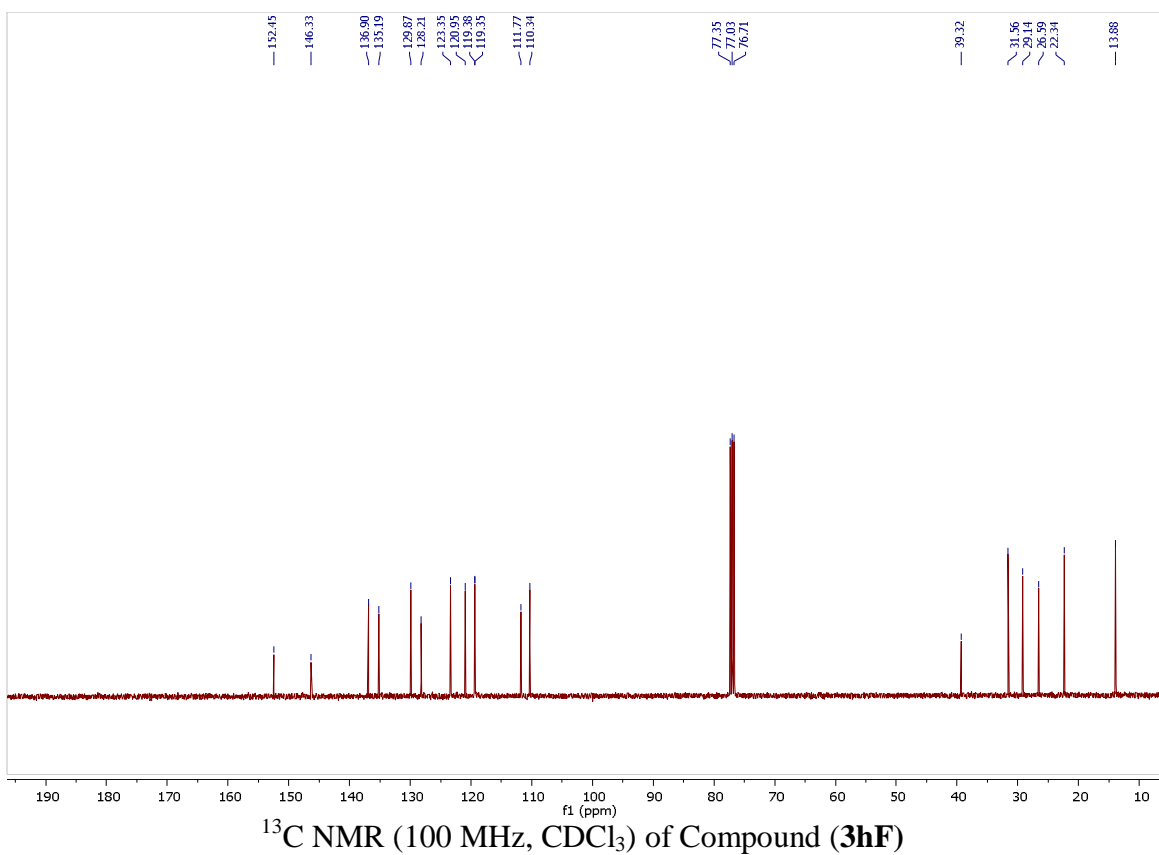

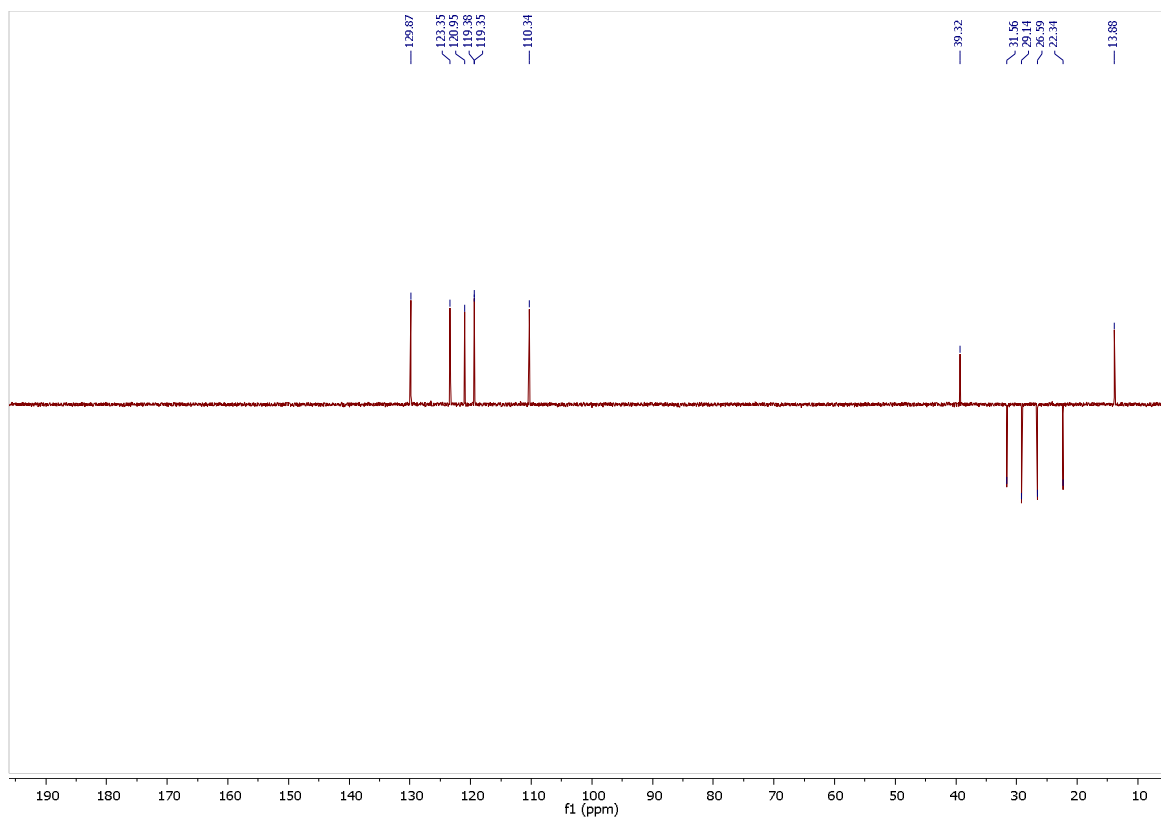

DEPT NMR (100 MHz, CDCl<sub>3</sub>) of Compound (3hF)

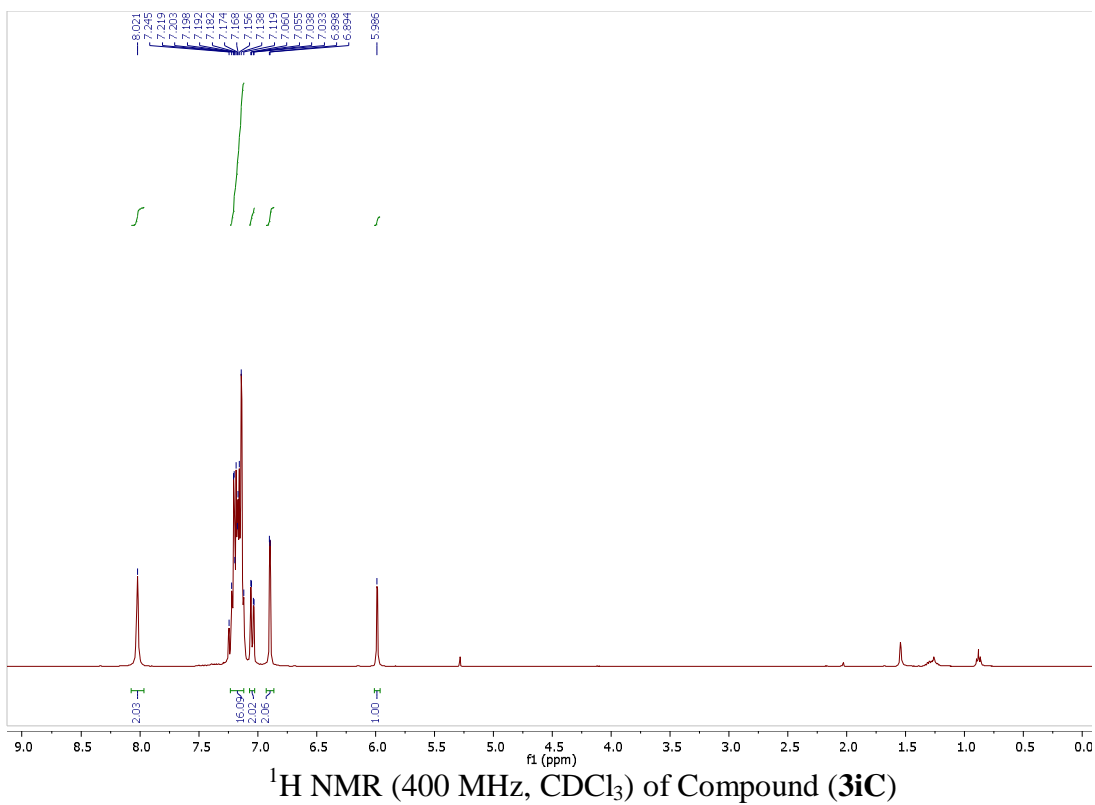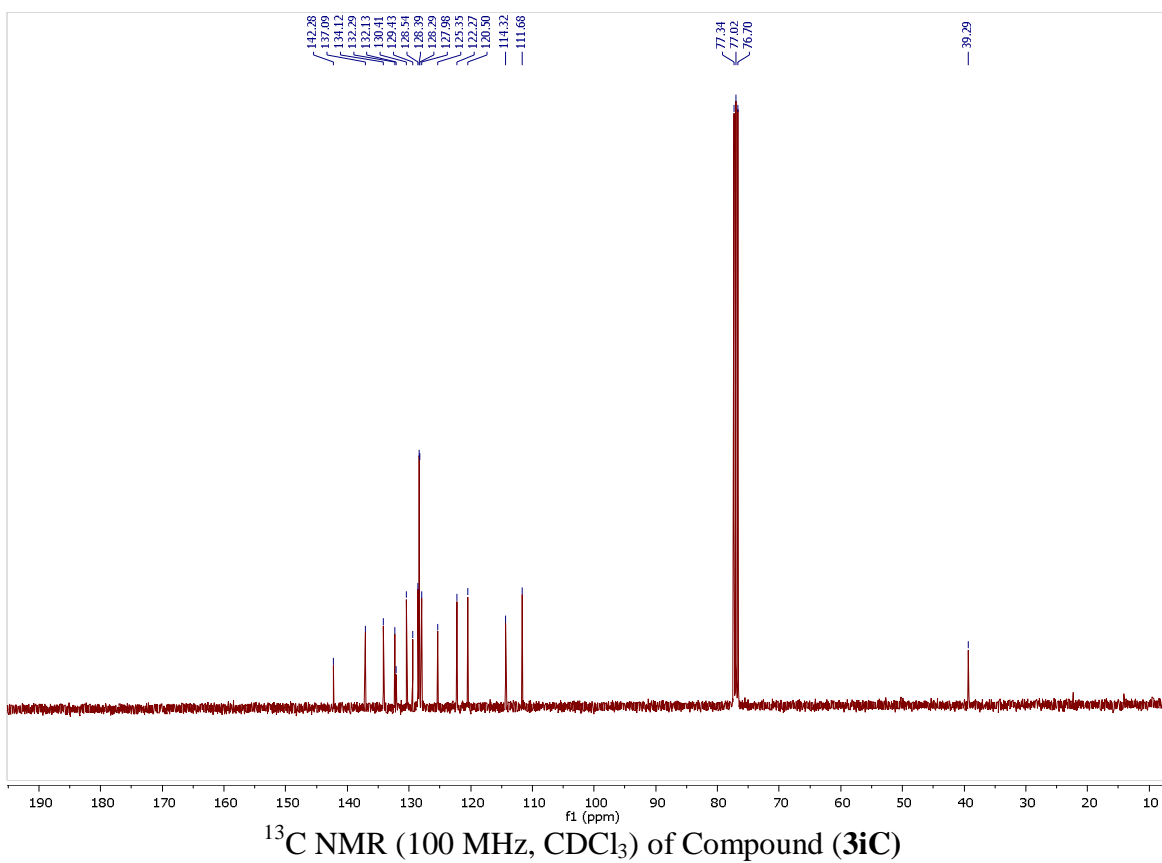

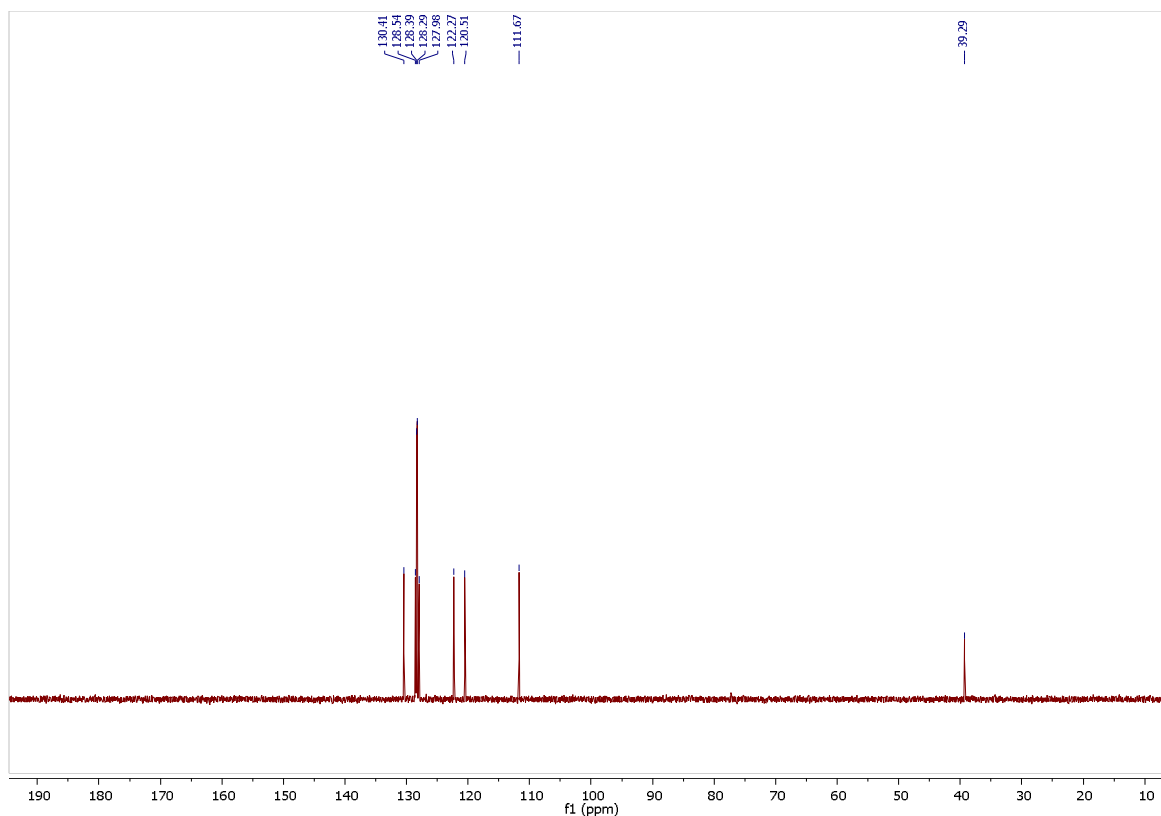

DEPT NMR (100 MHz, CDCl<sub>3</sub>) of Compound (3iC)

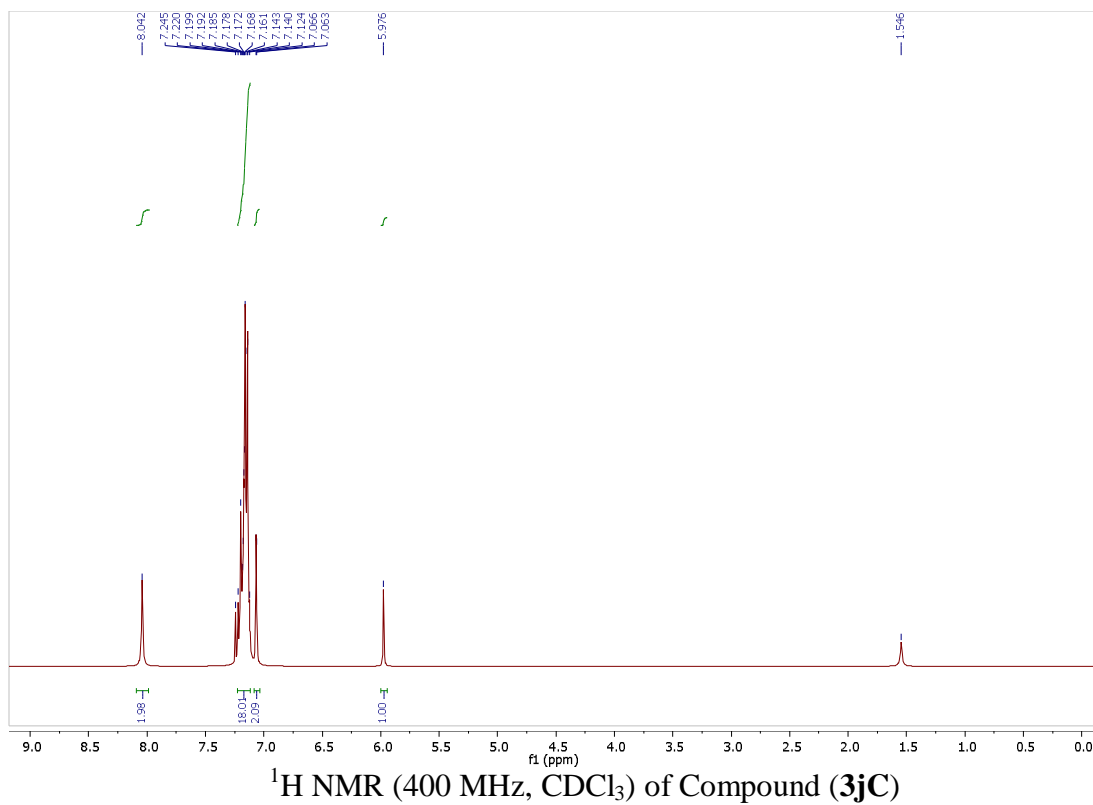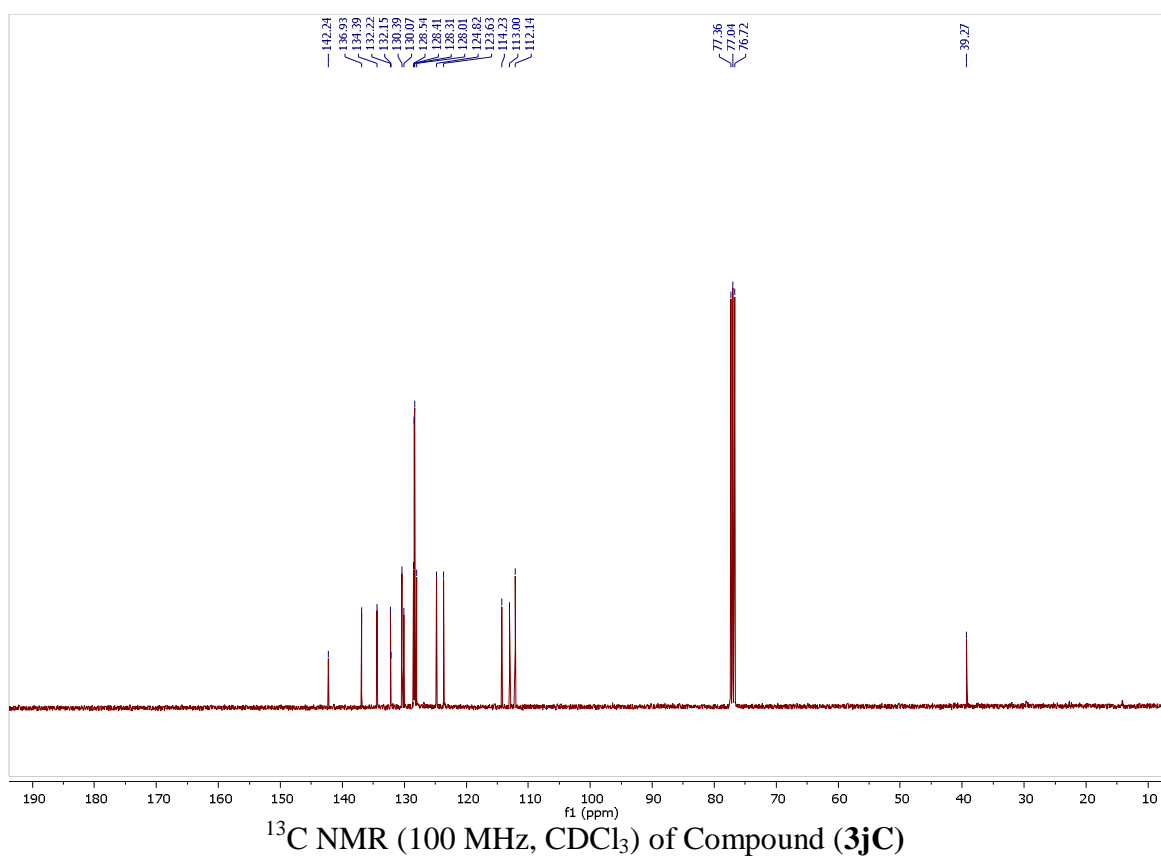

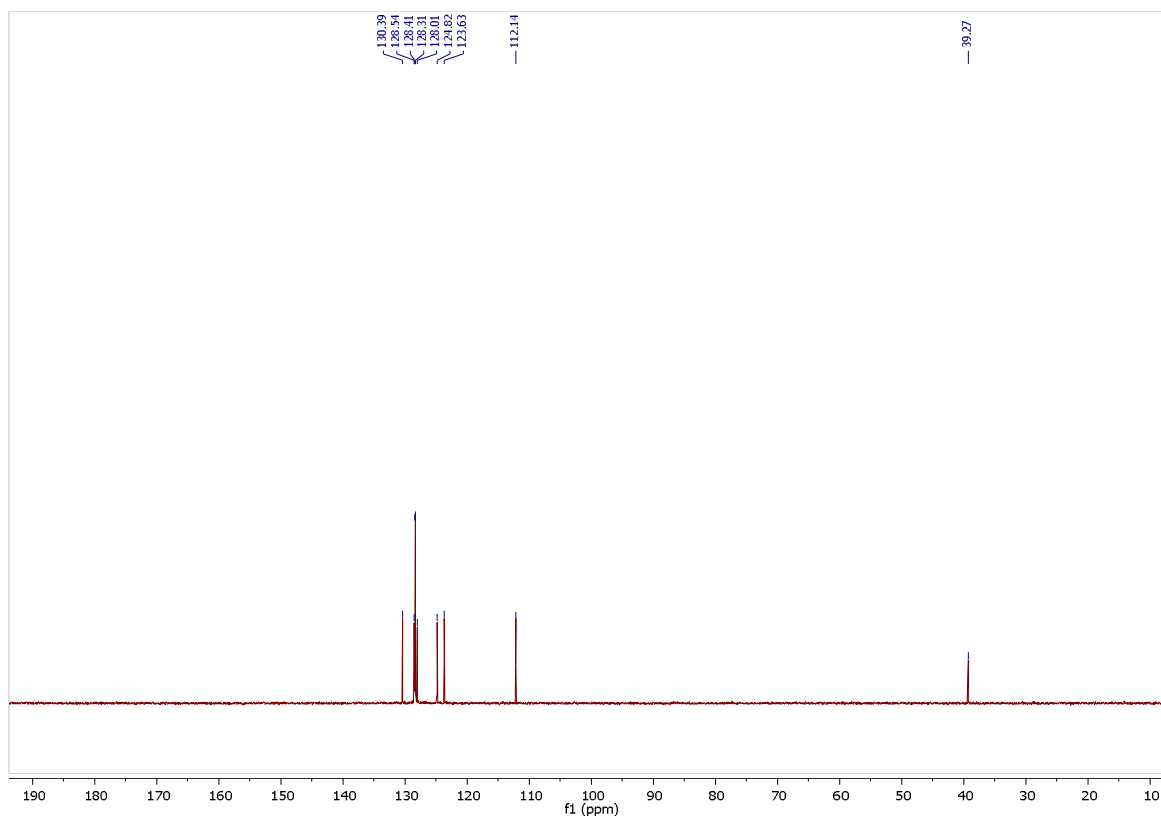

DEPT NMR (100 MHz, CDCl<sub>3</sub>) of Compound (3jC)

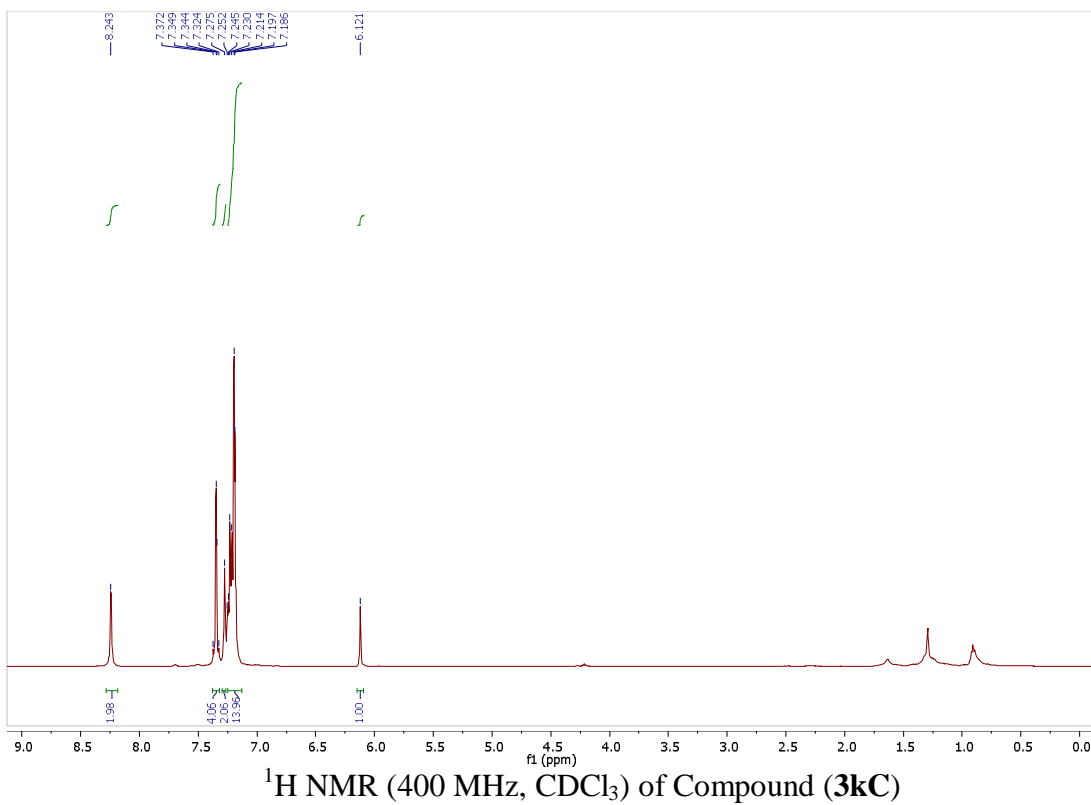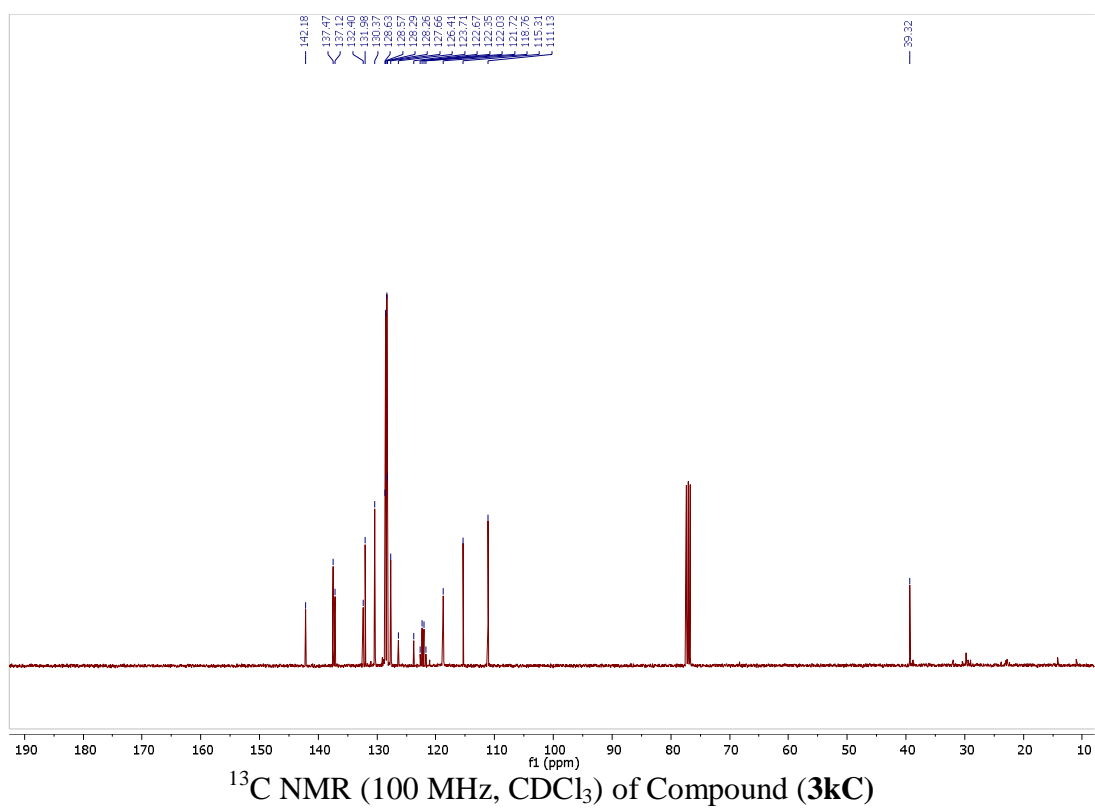

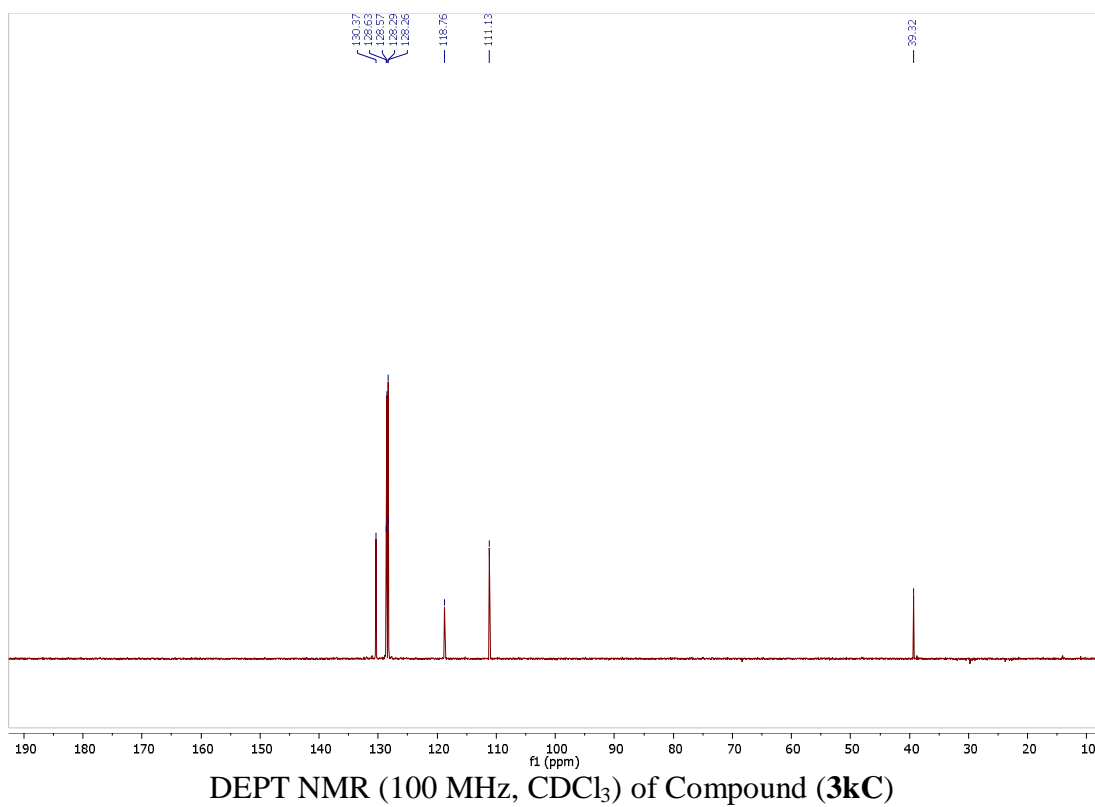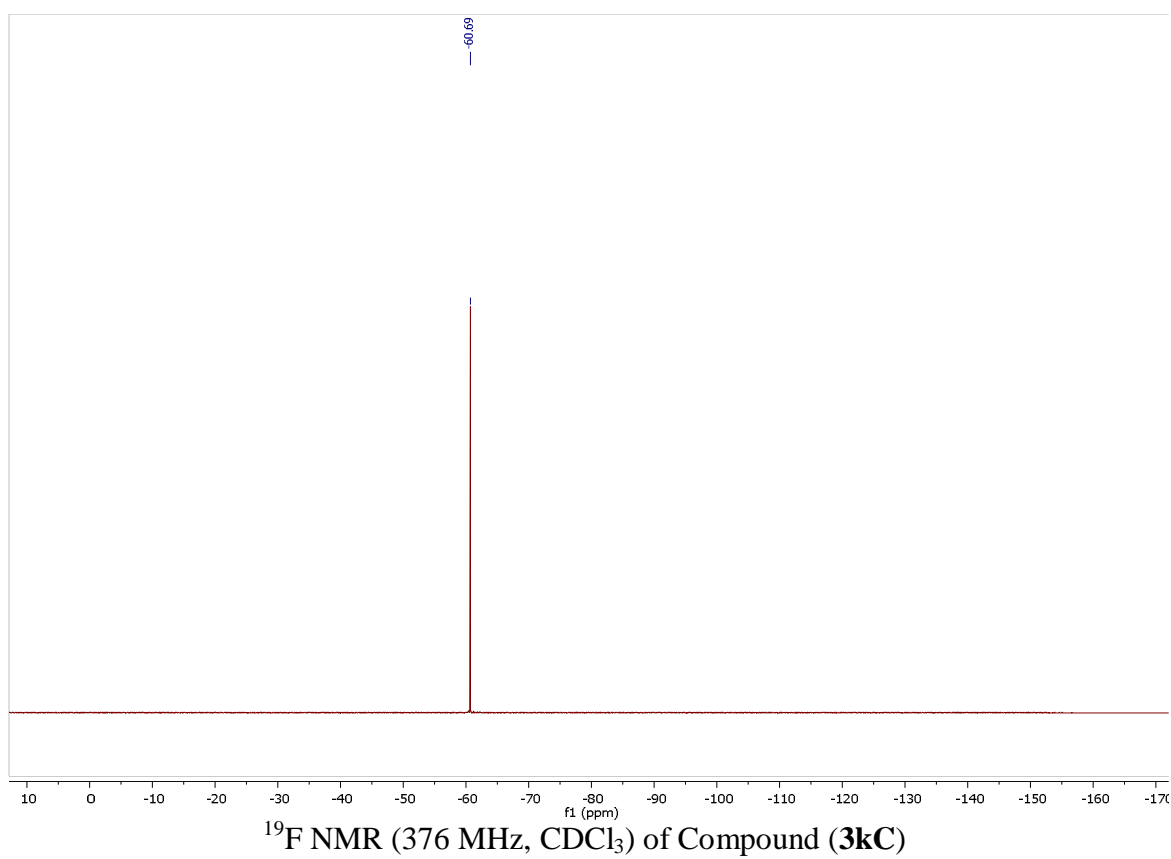

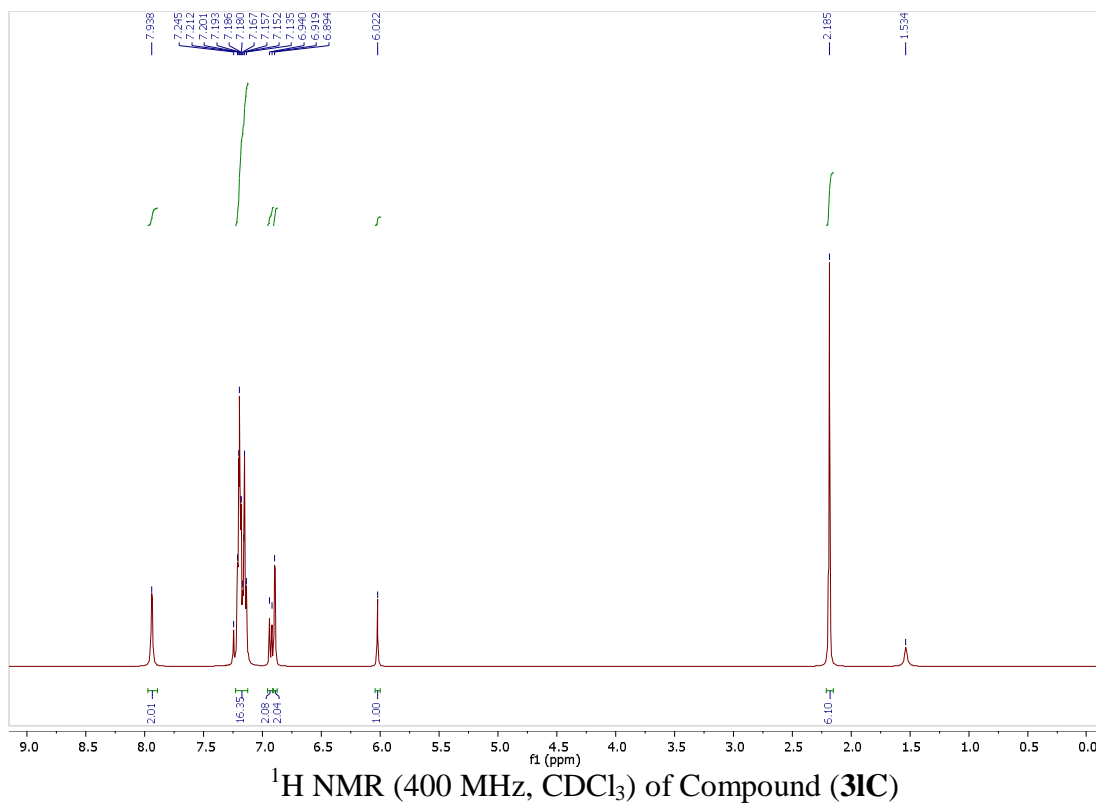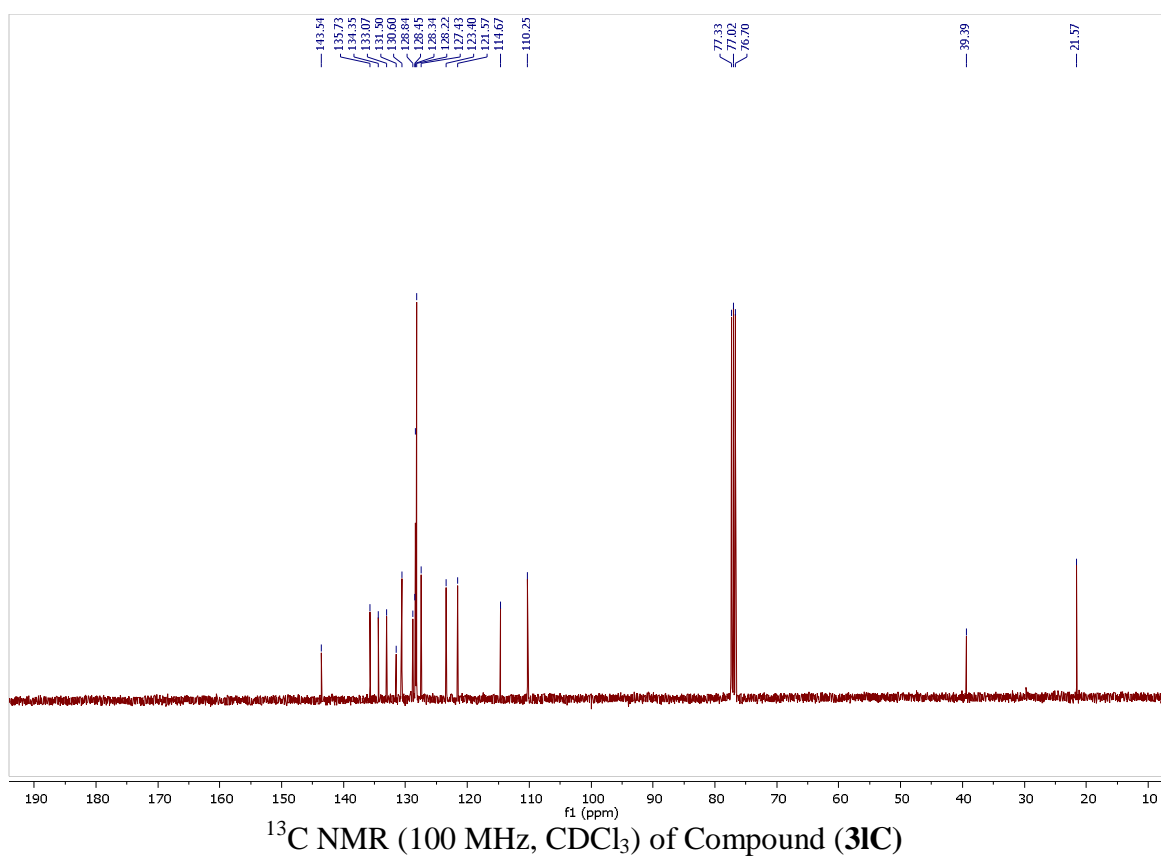

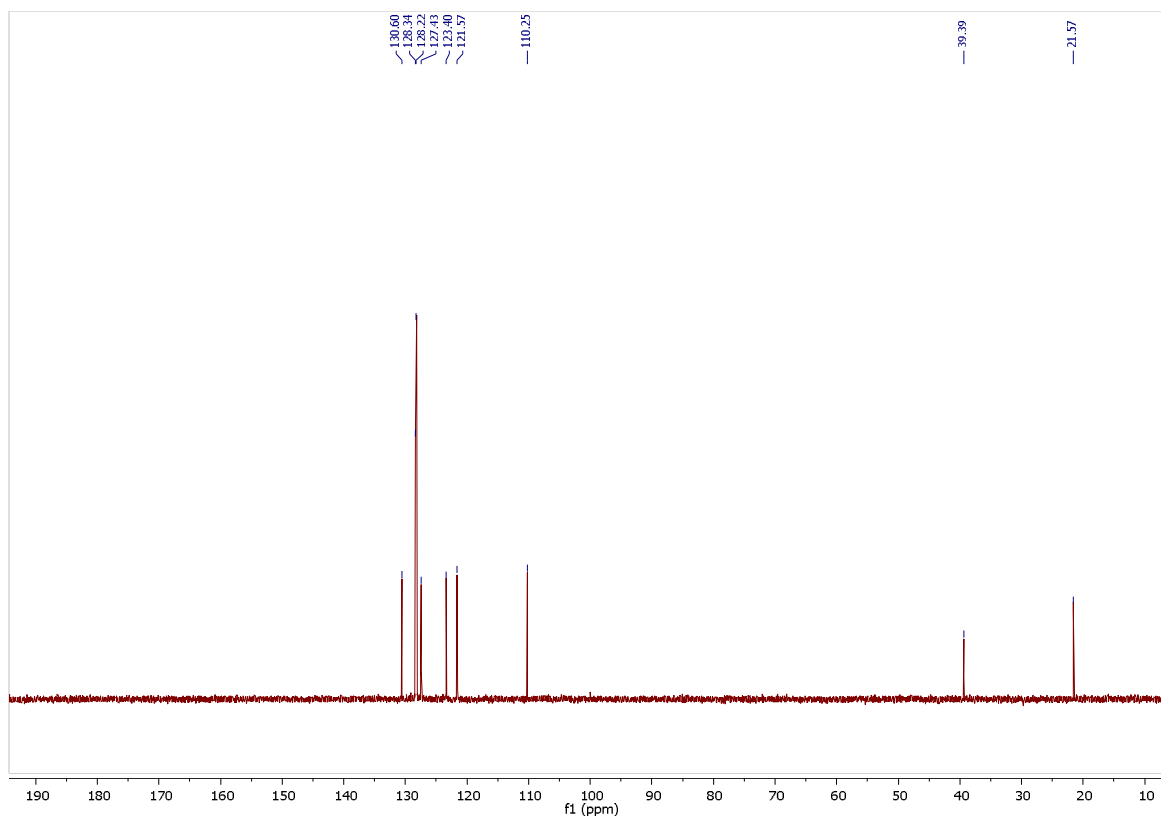

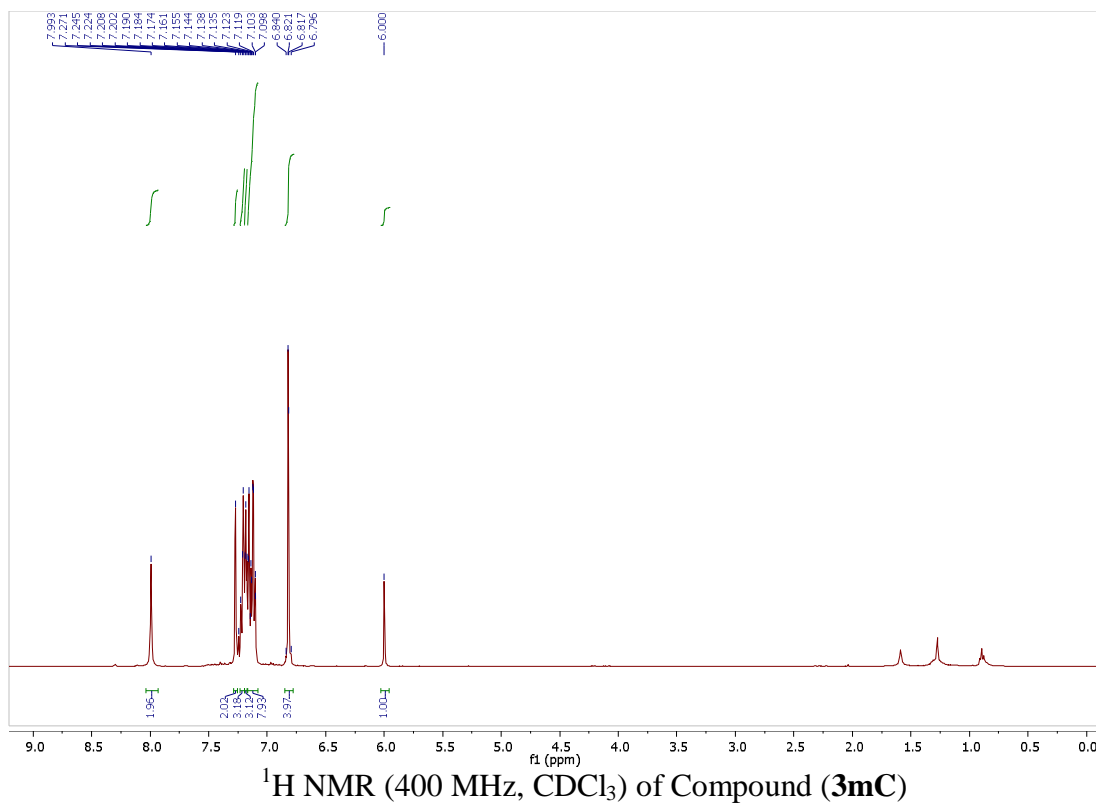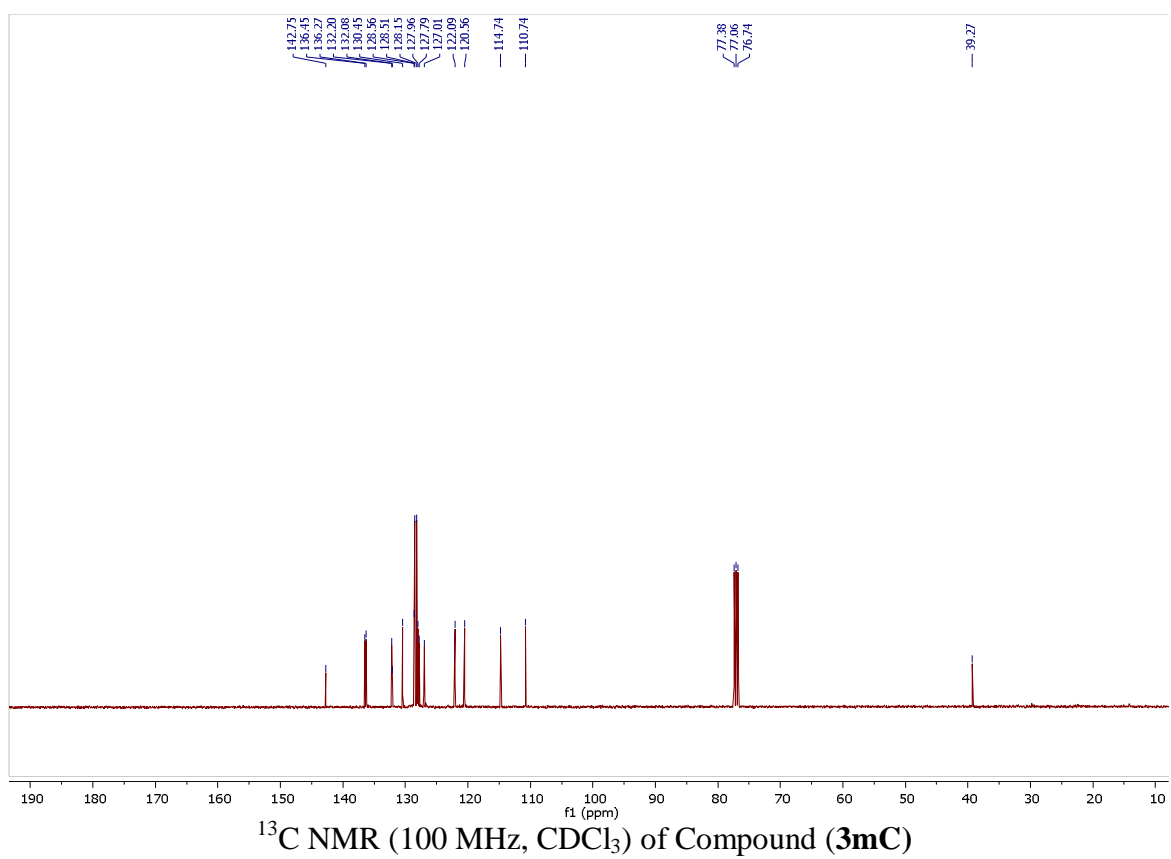

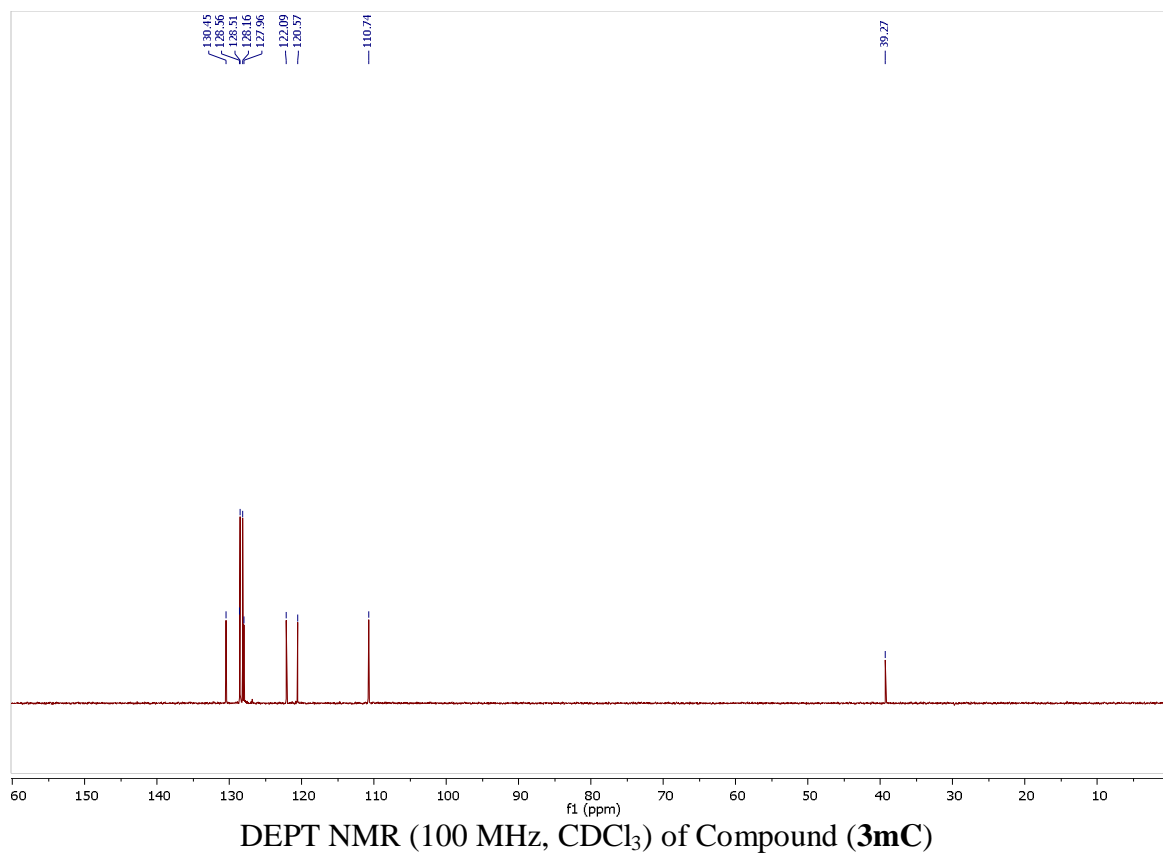

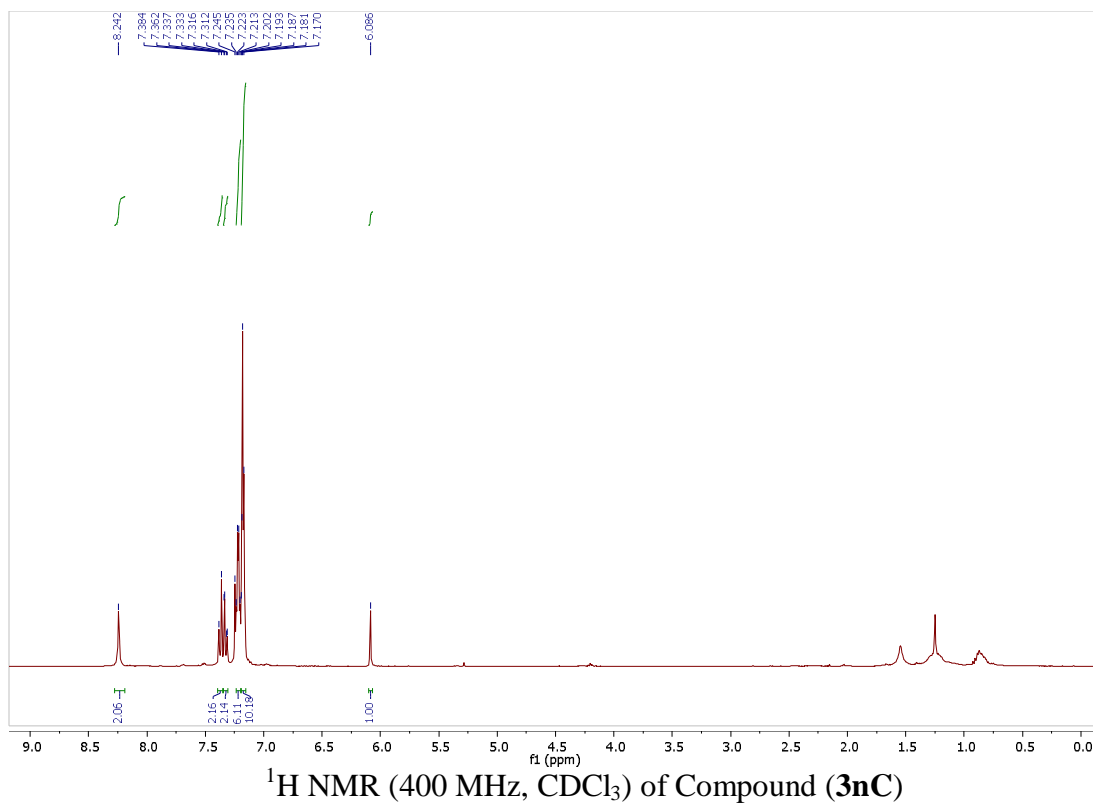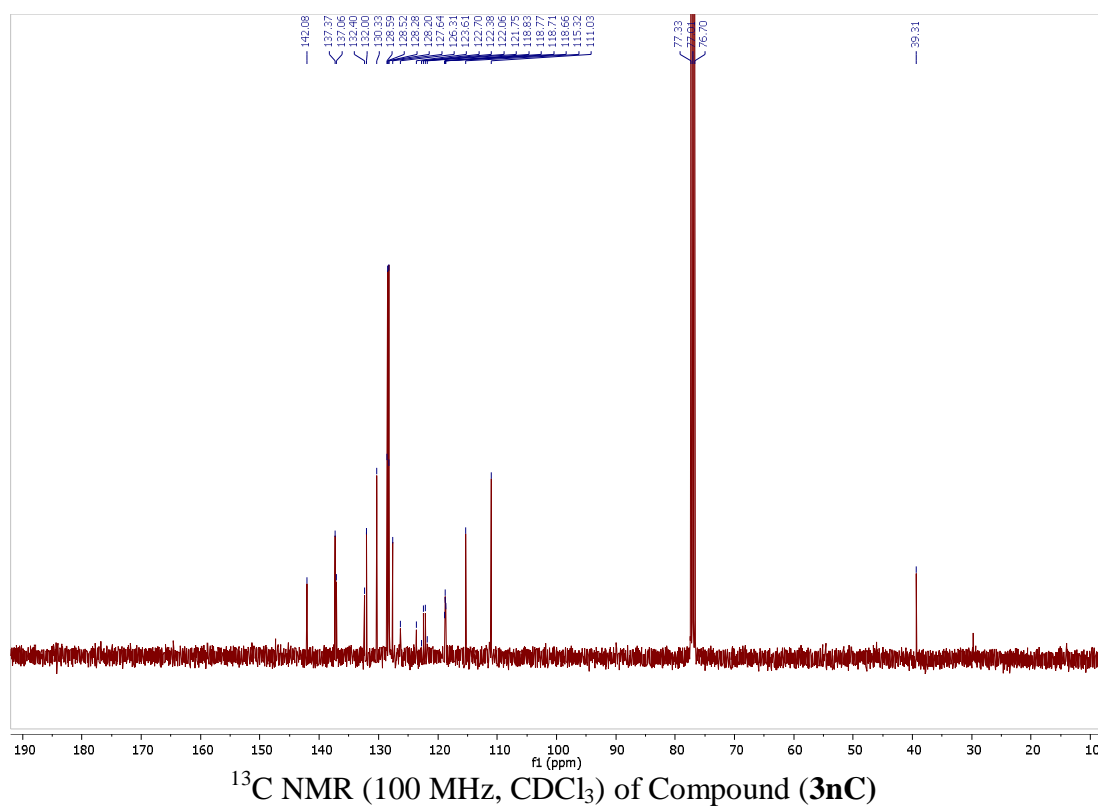

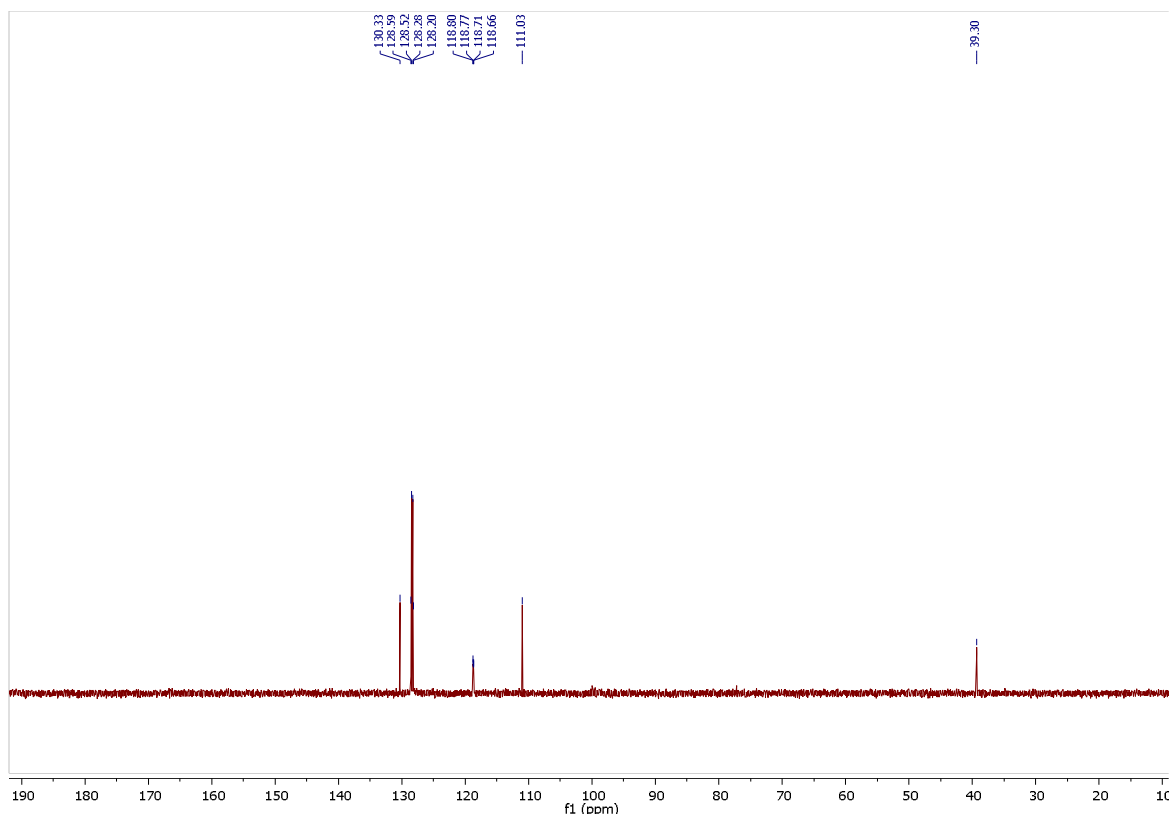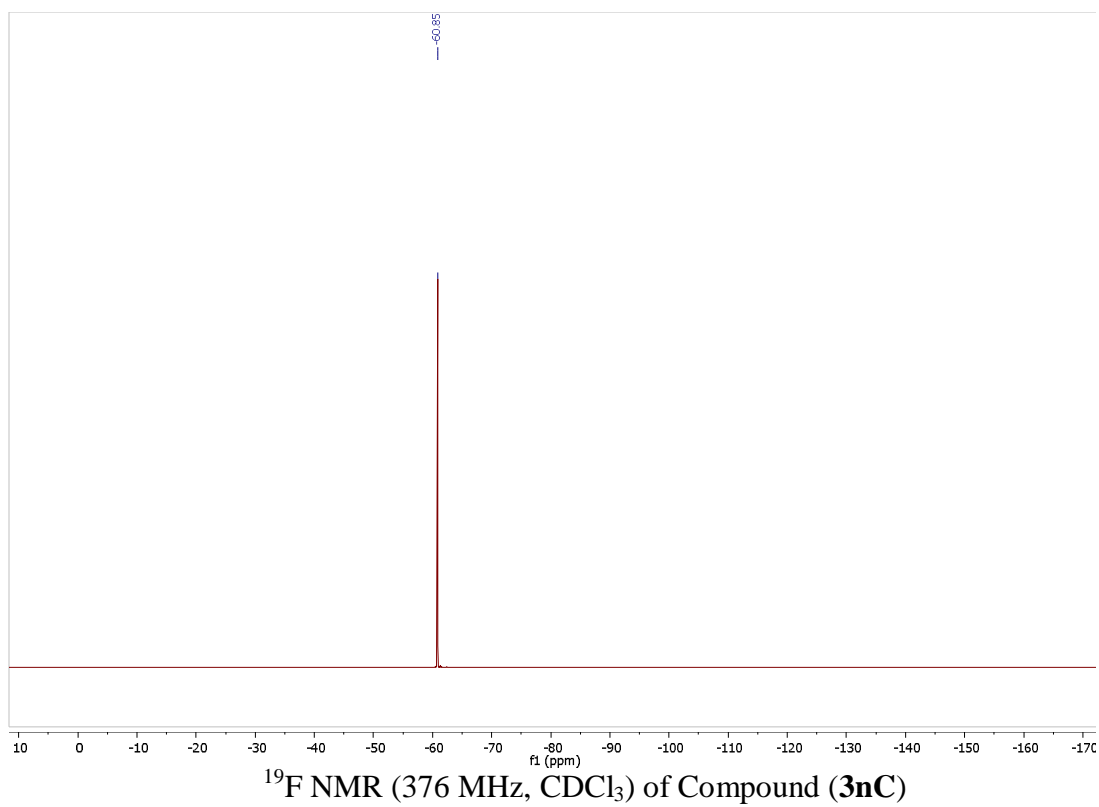

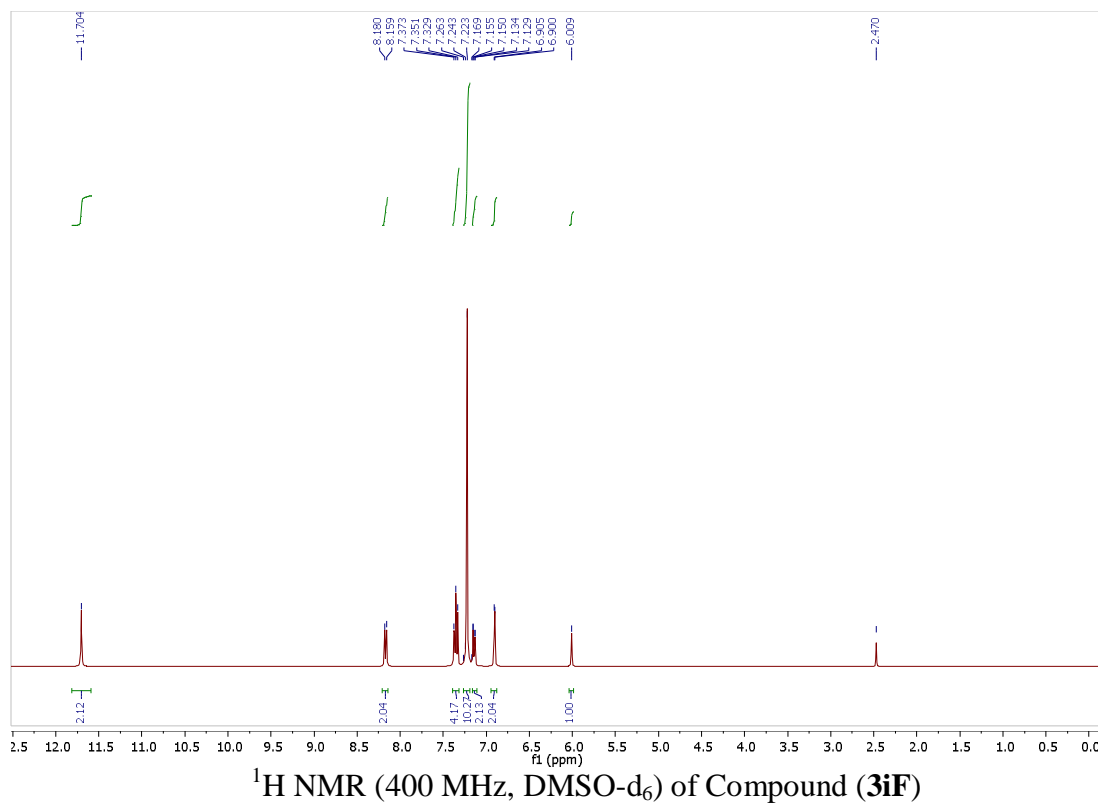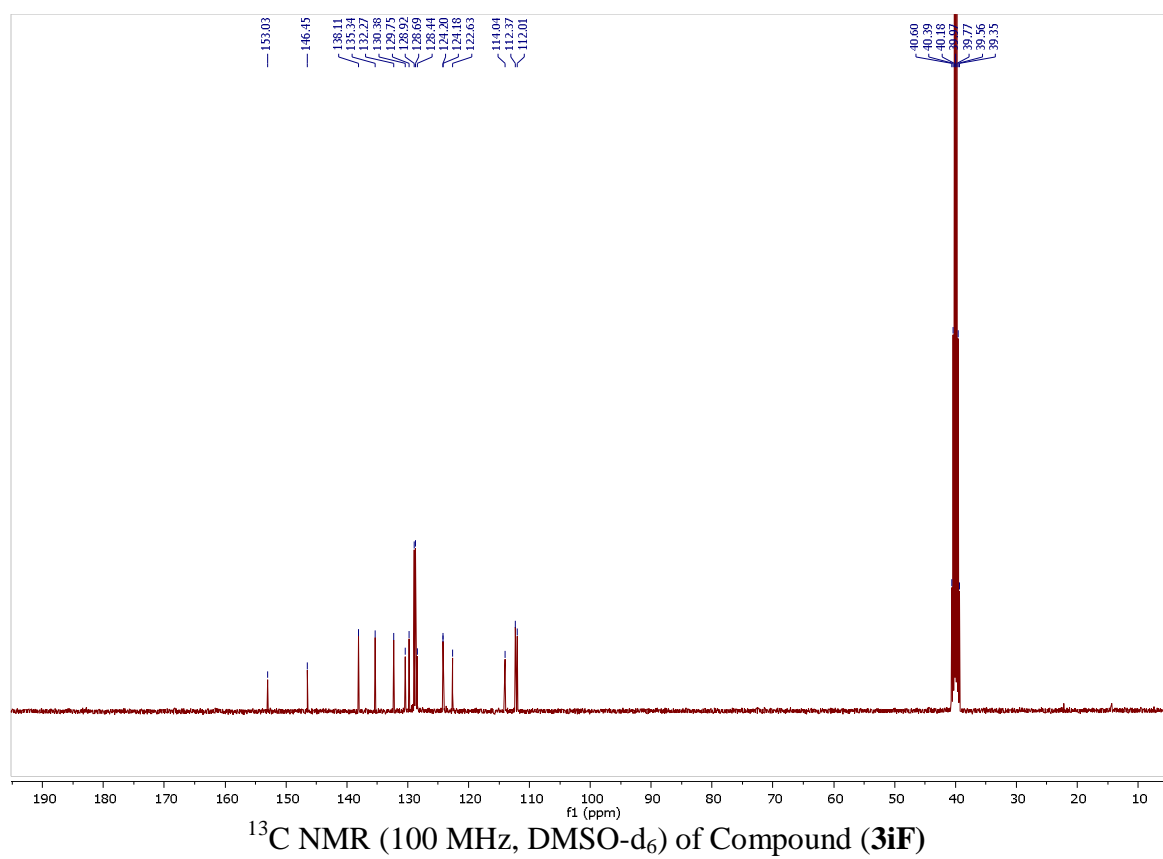

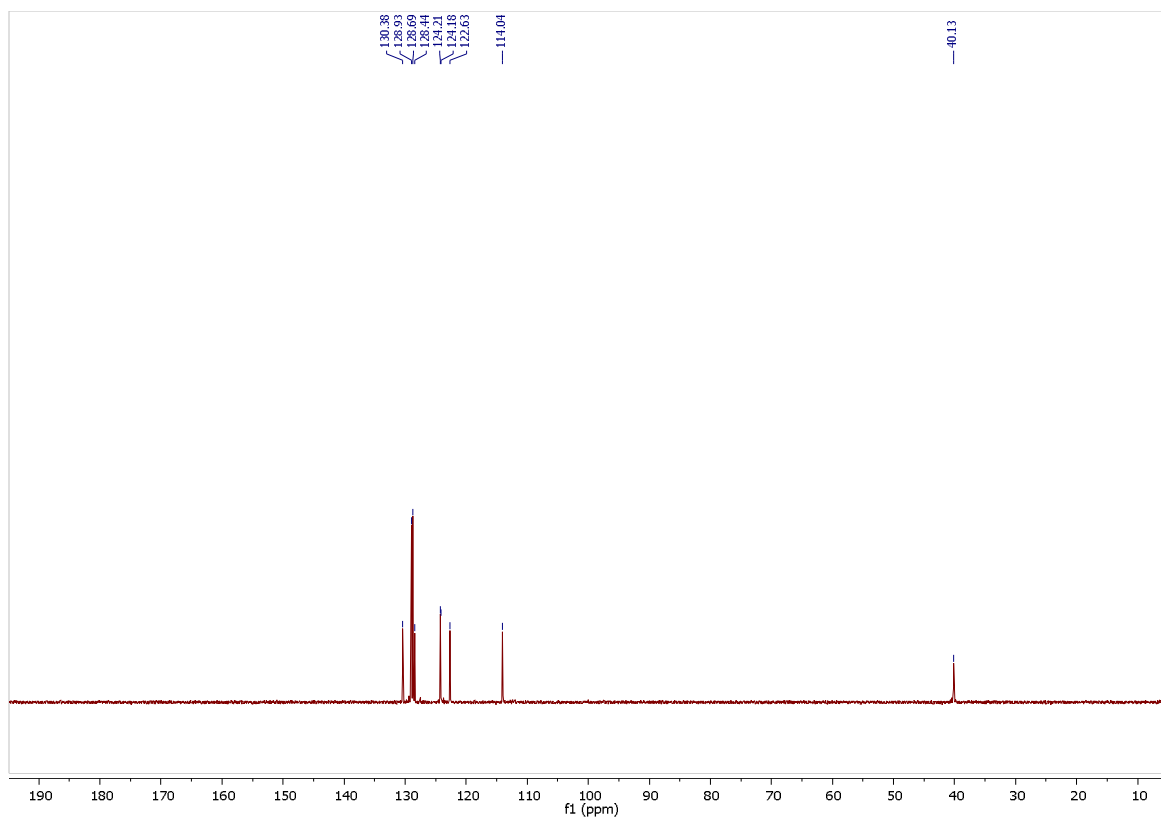

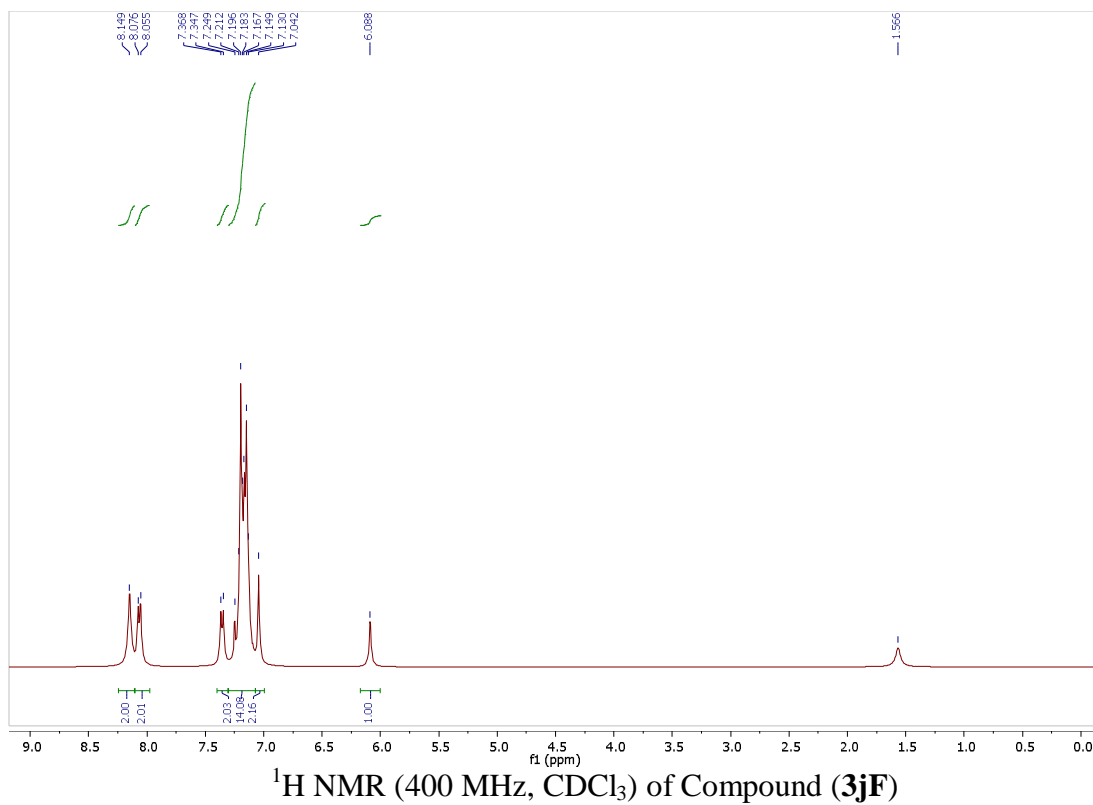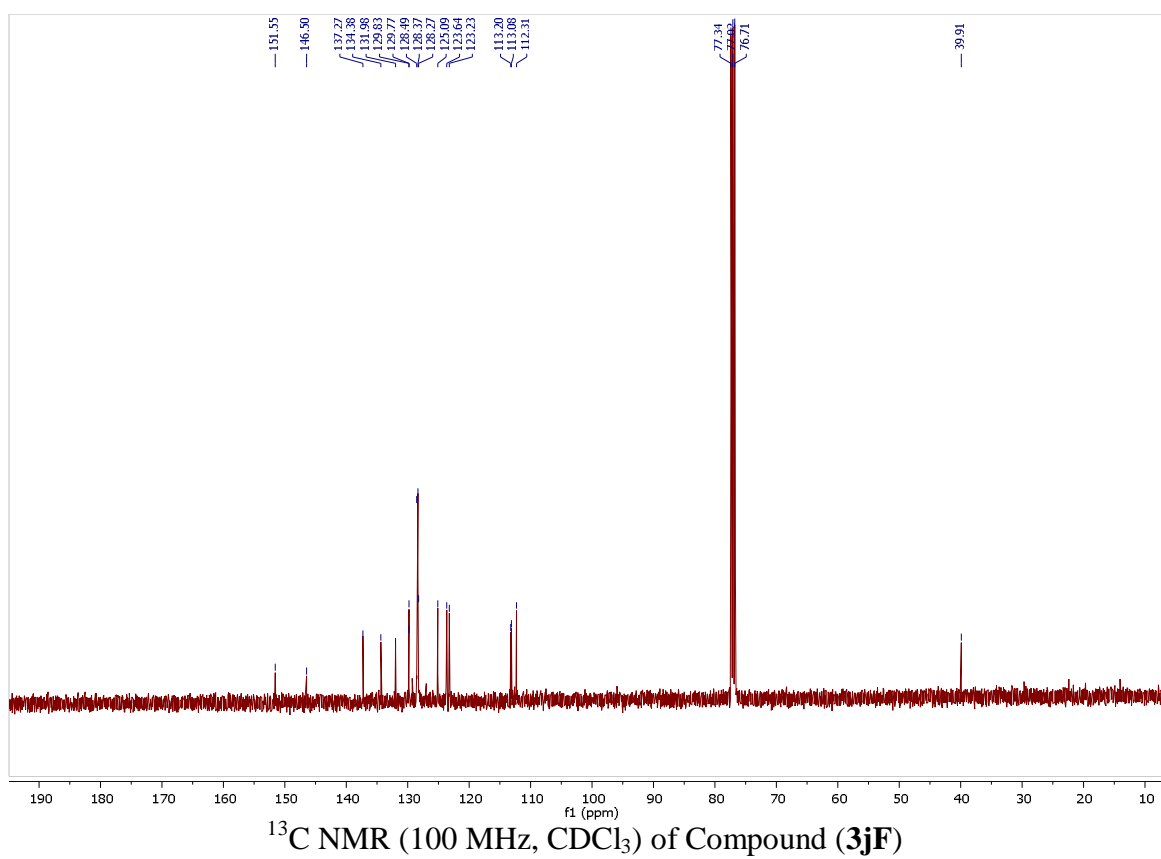

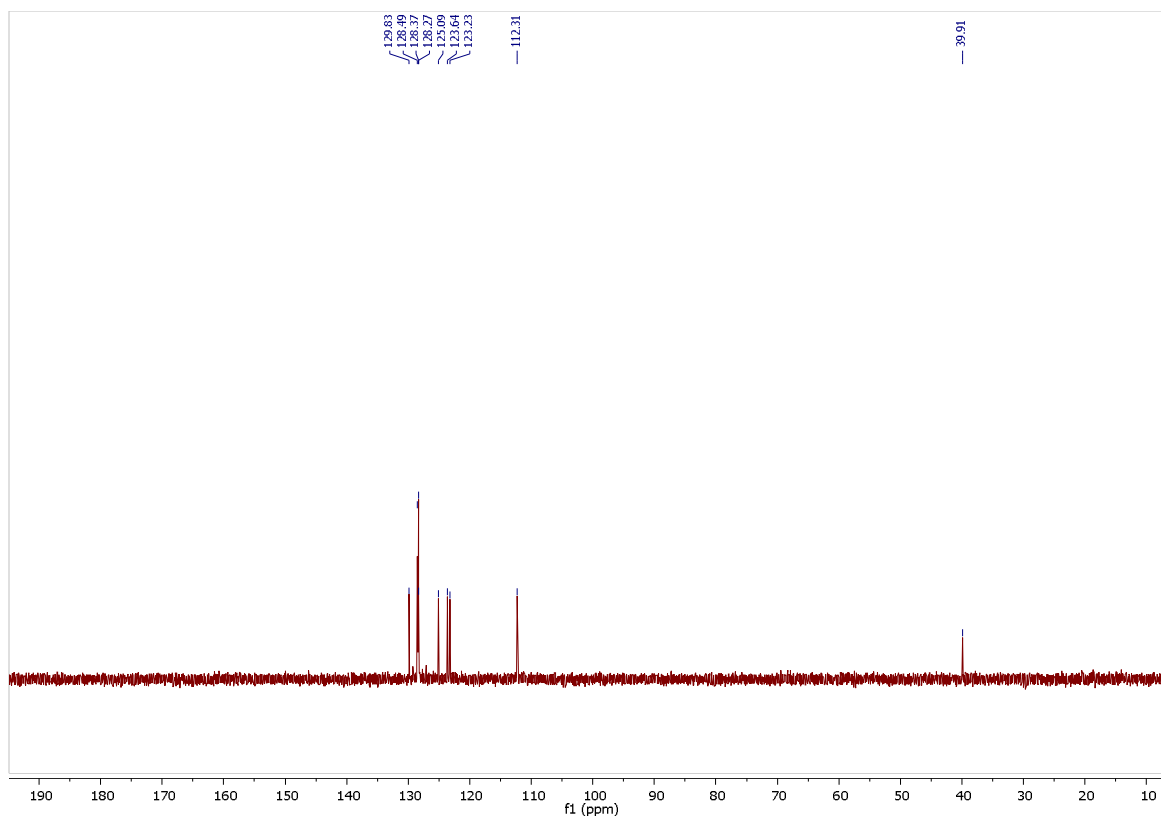

DEPT NMR (100 MHz, CDCl<sub>3</sub>) of Compound (3jF)

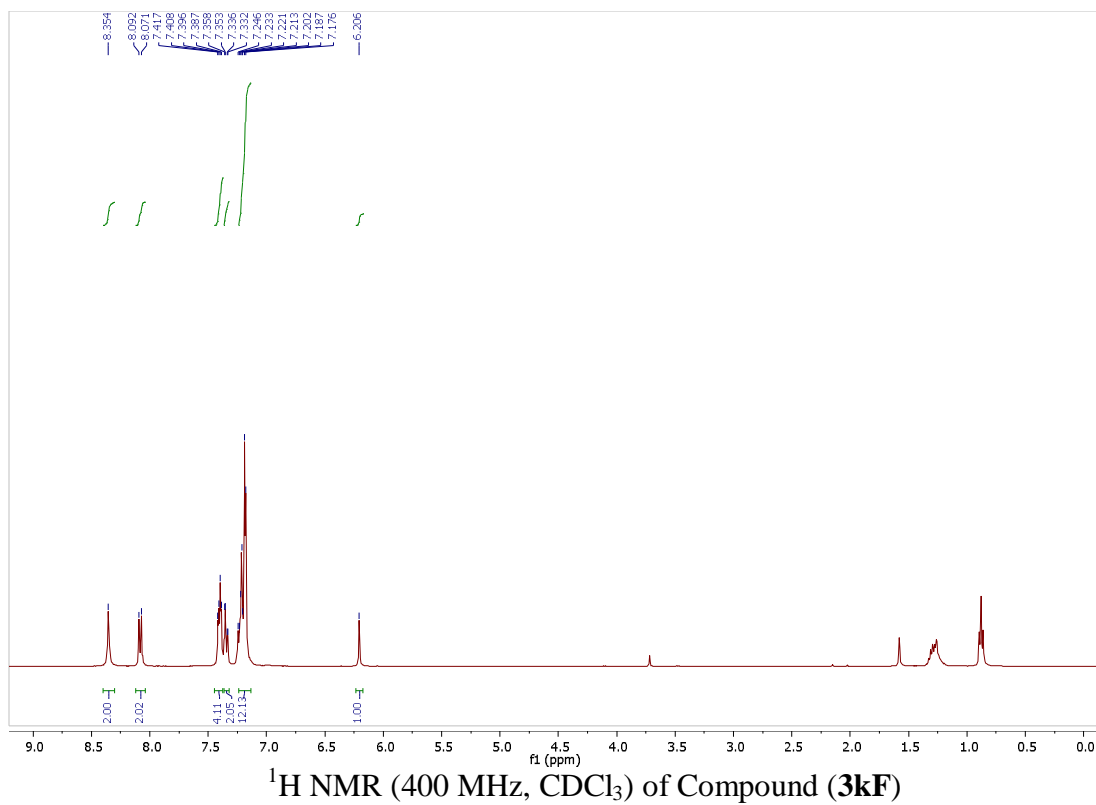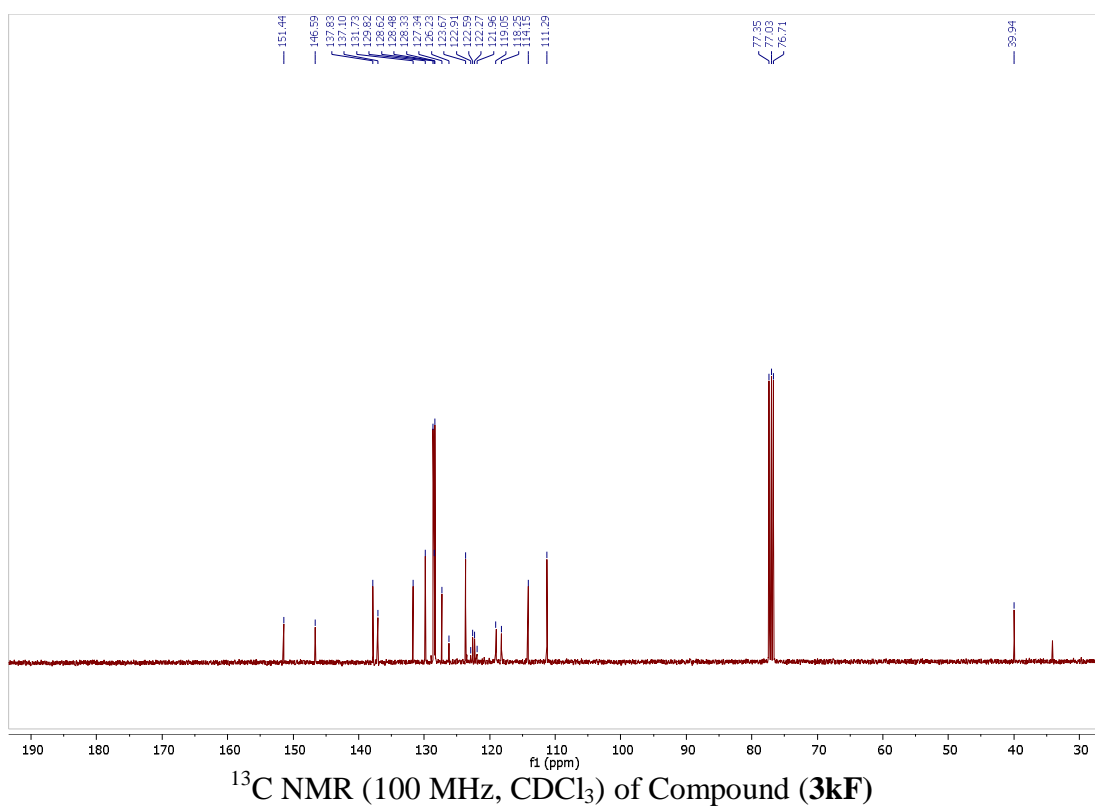

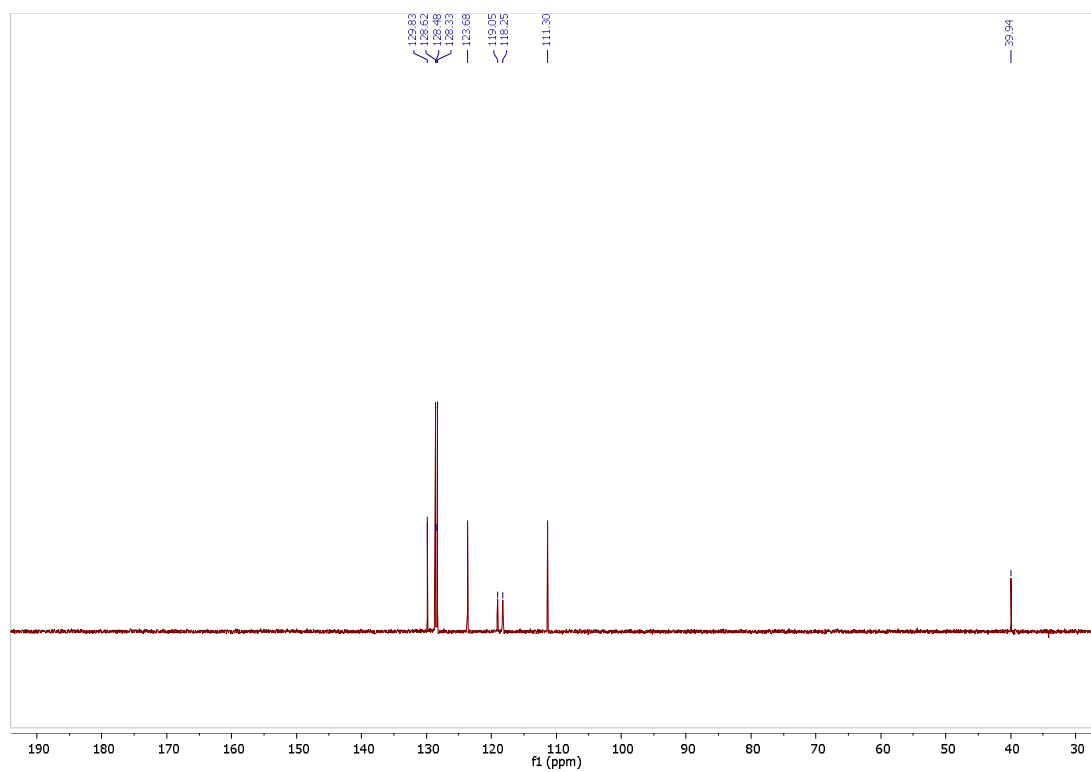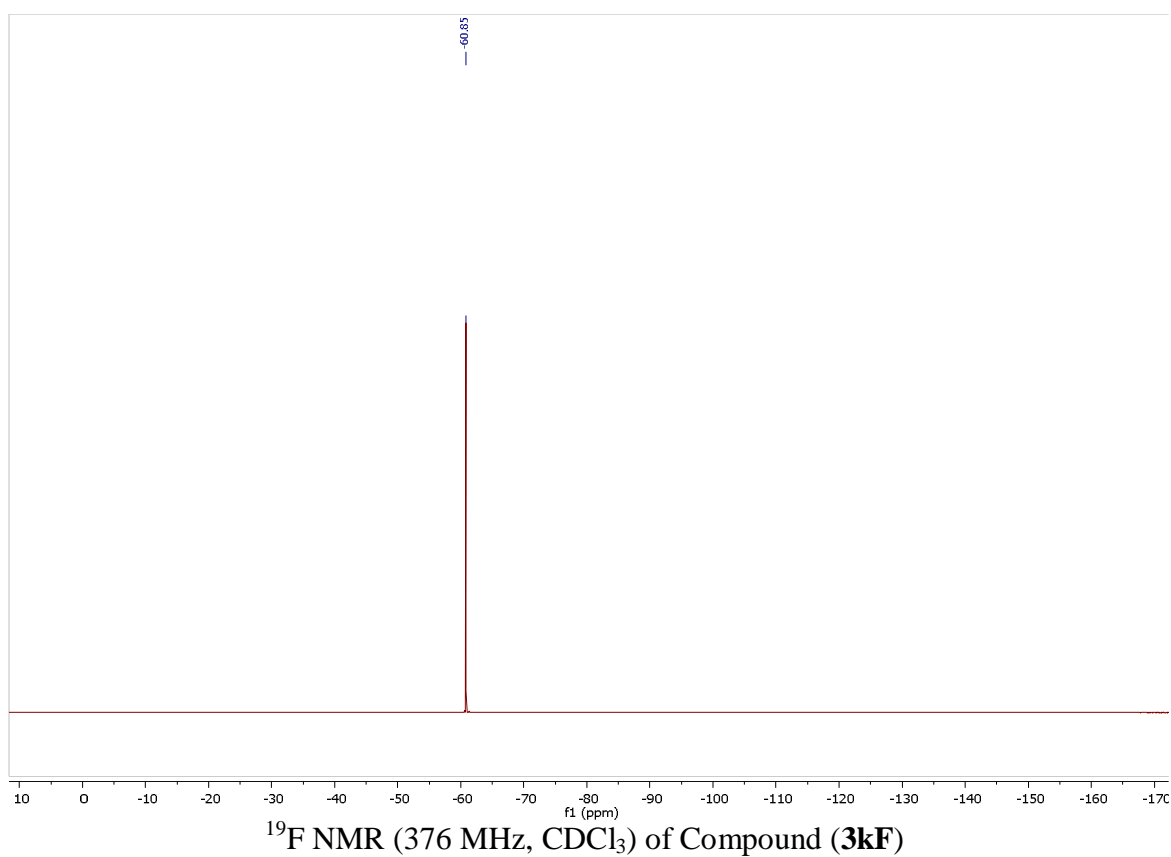

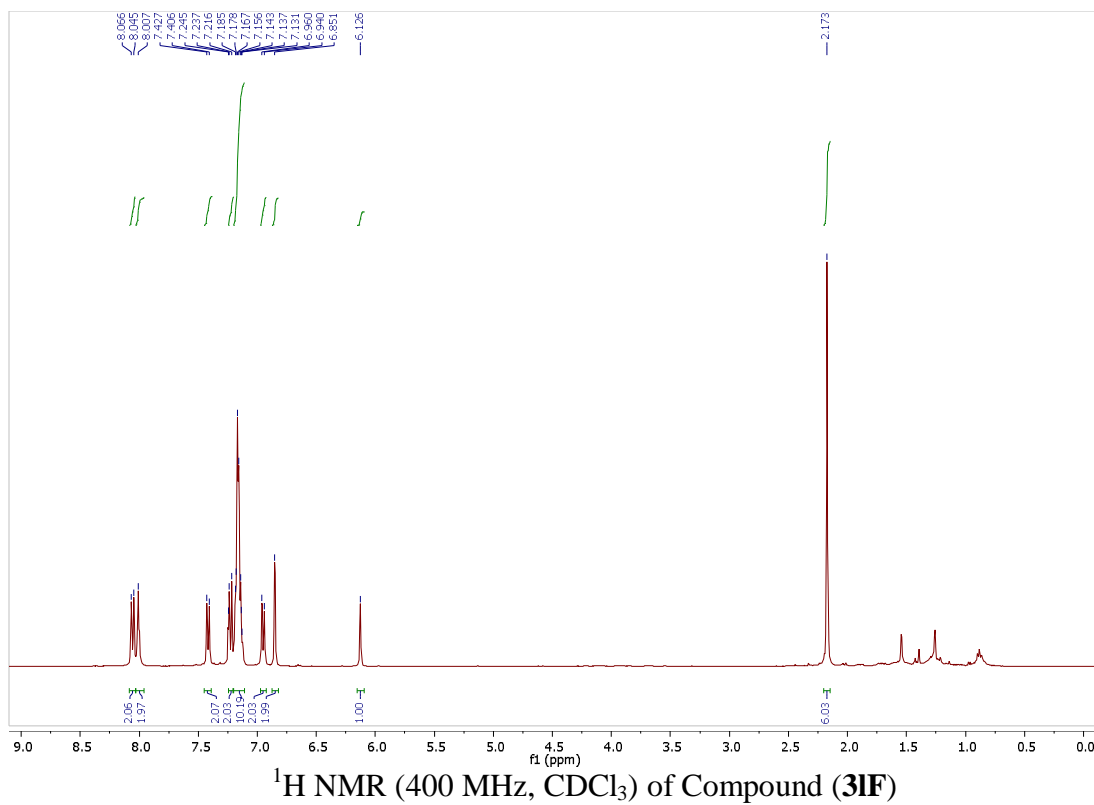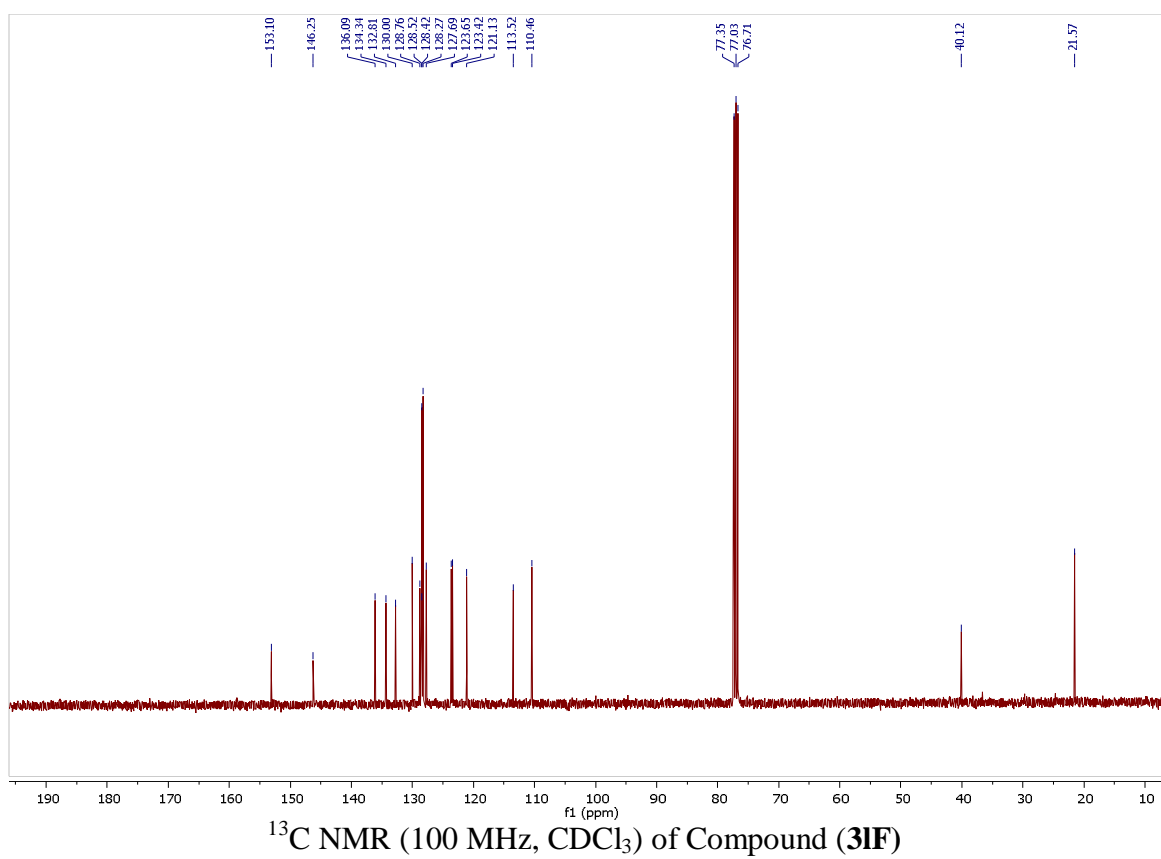

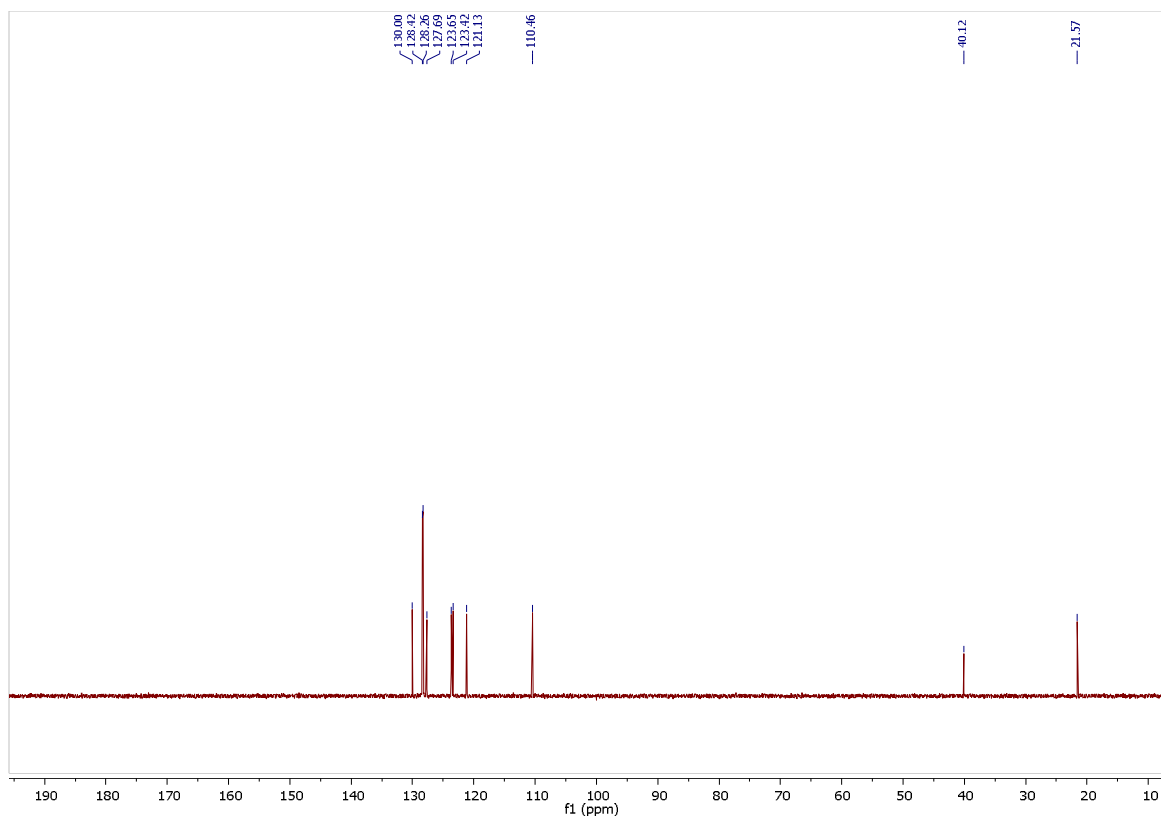

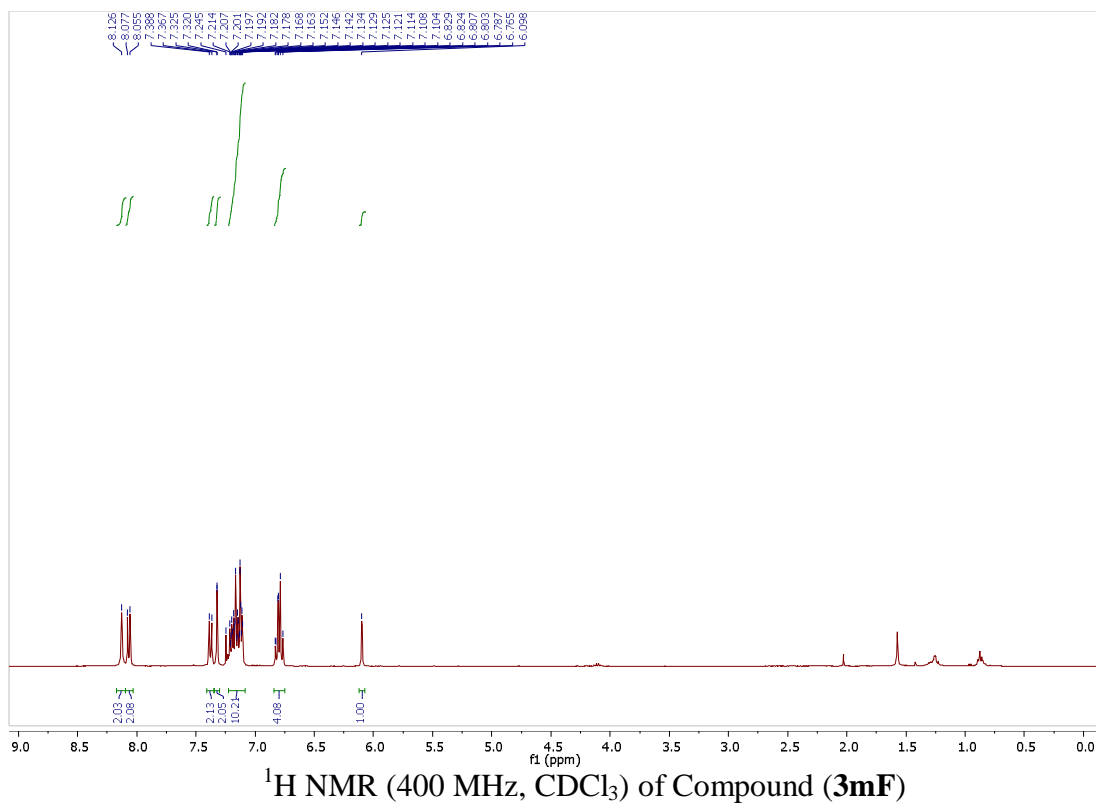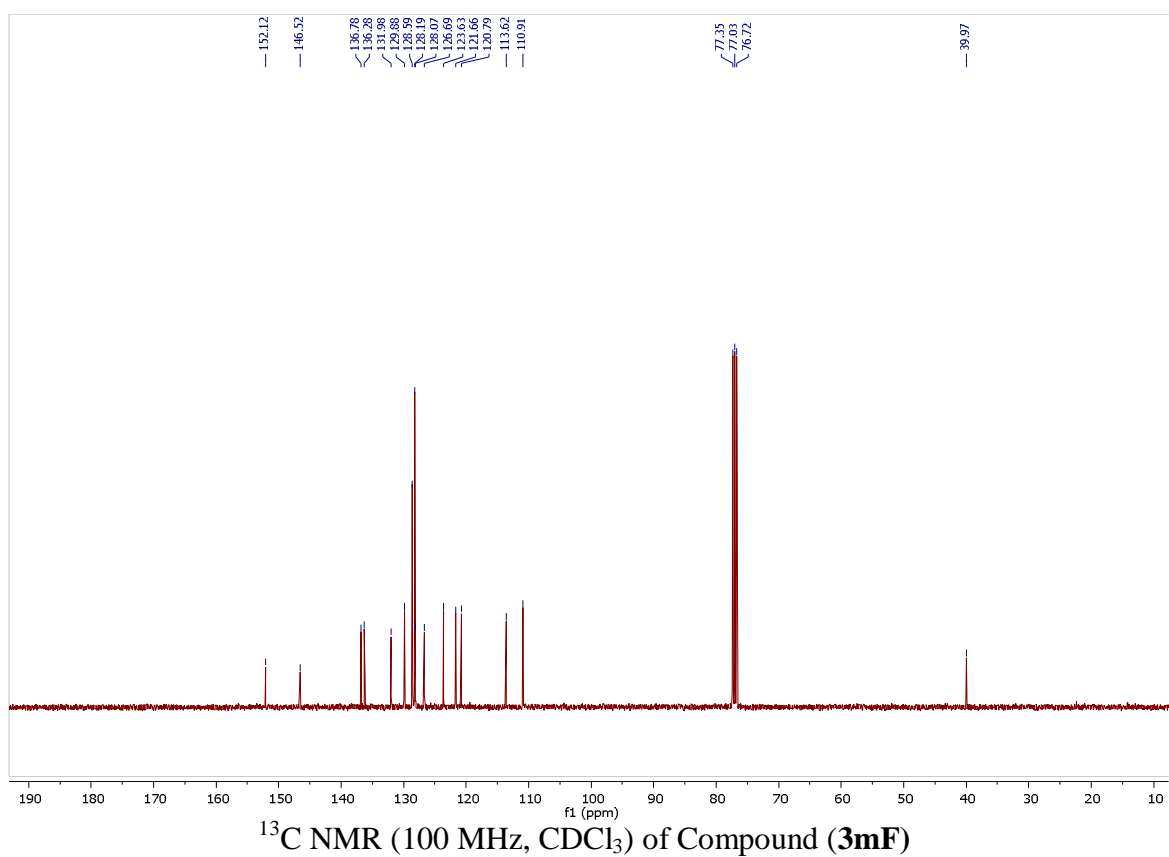

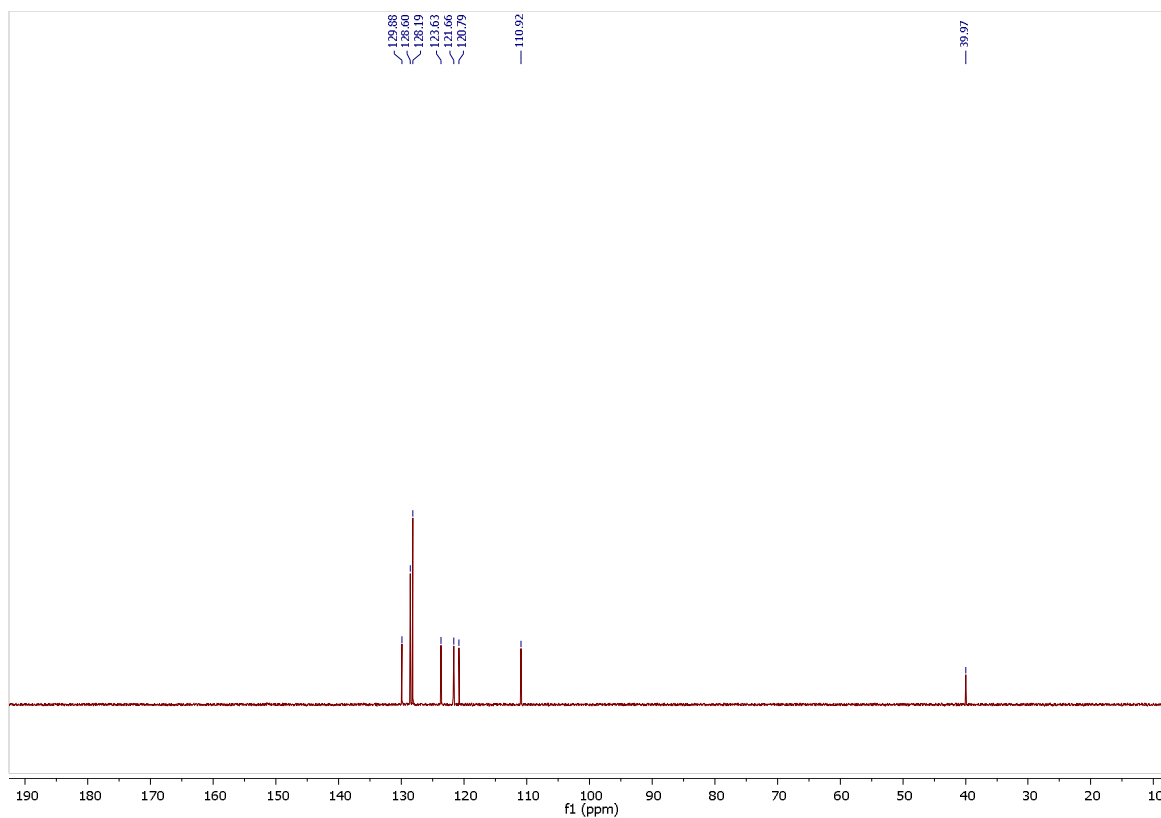

DEPT NMR (100 MHz, CDCl<sub>3</sub>) of Compound (**3mF**)

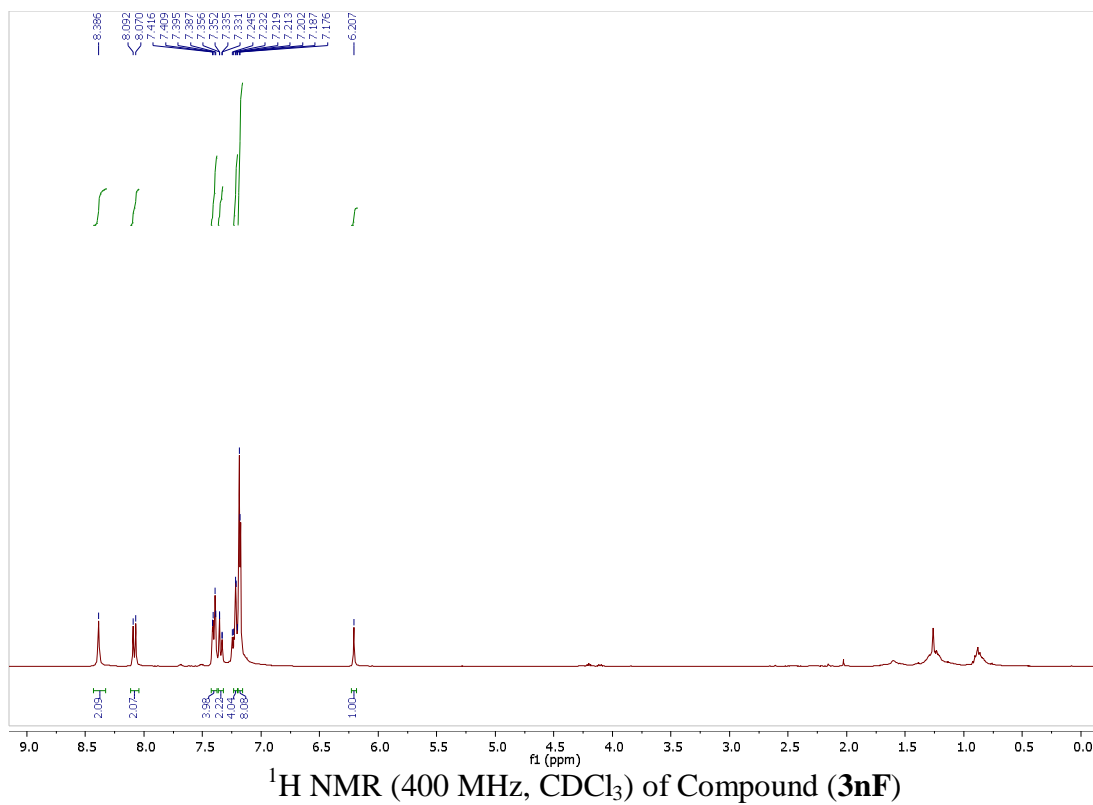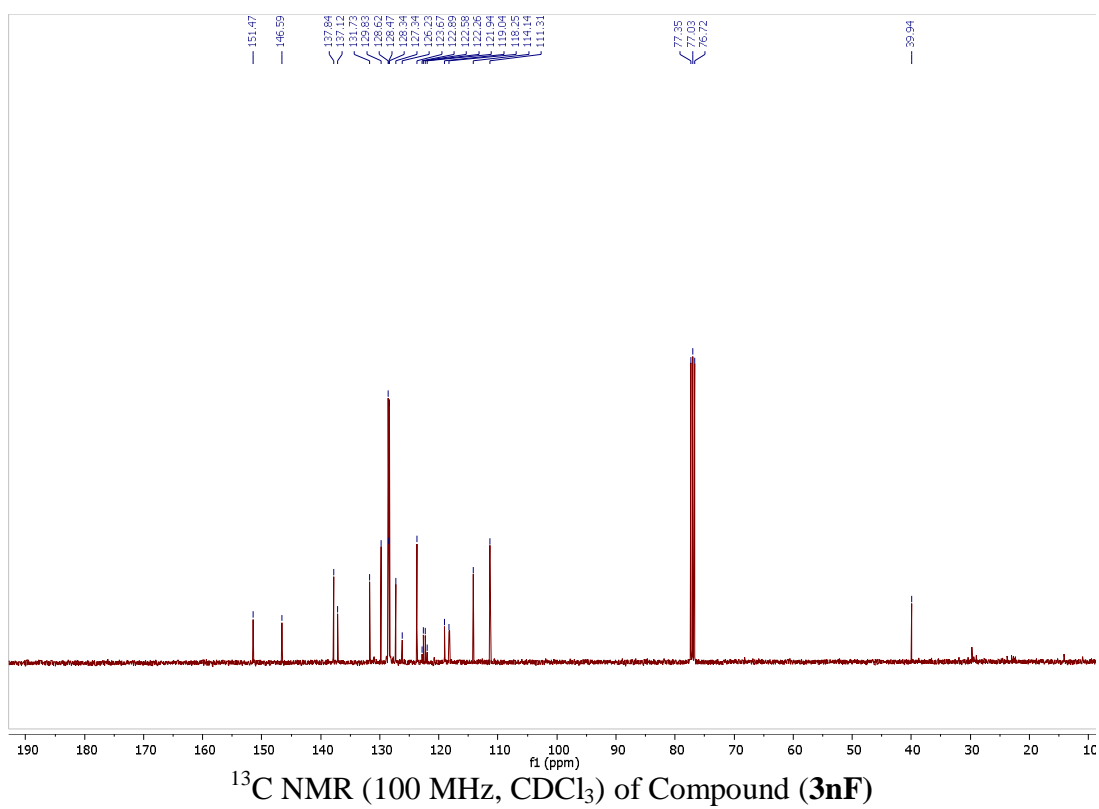

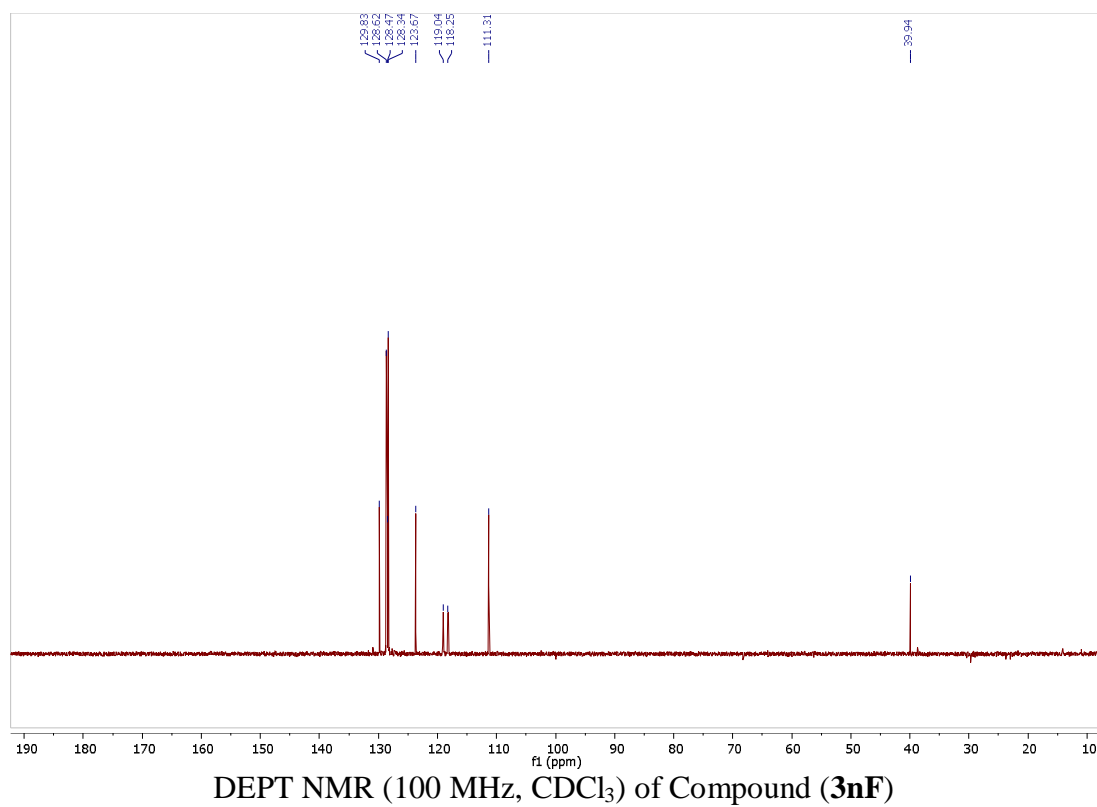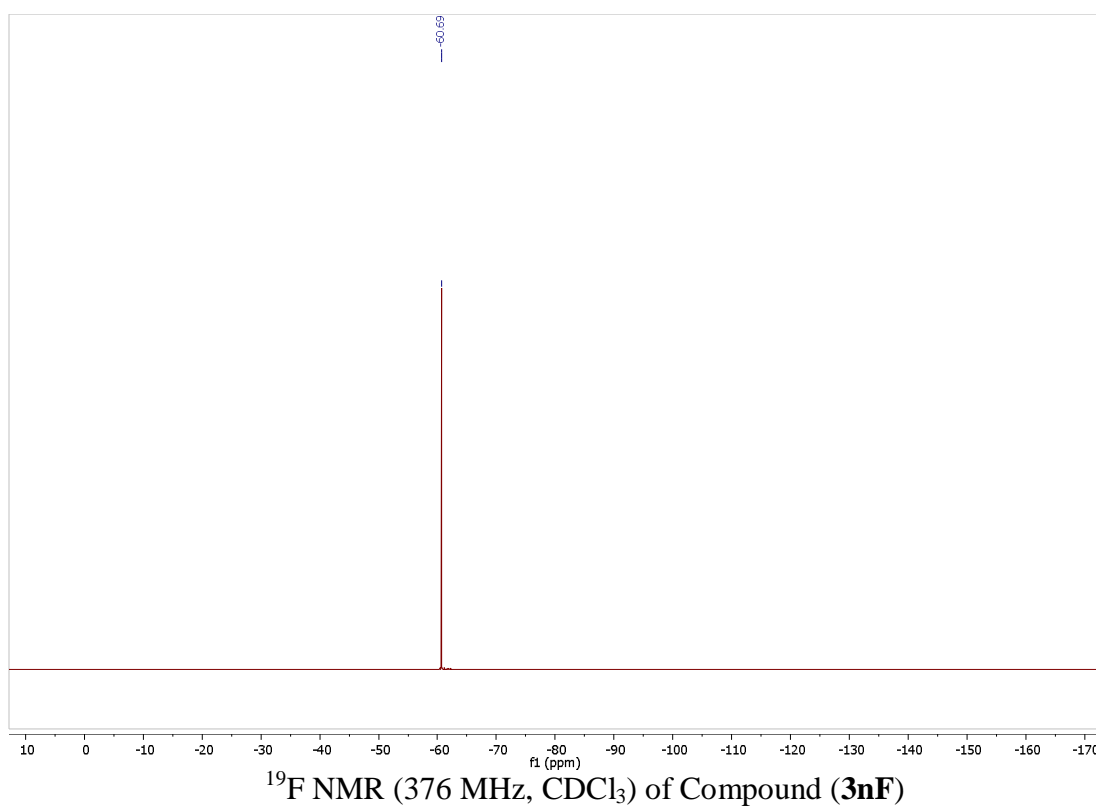

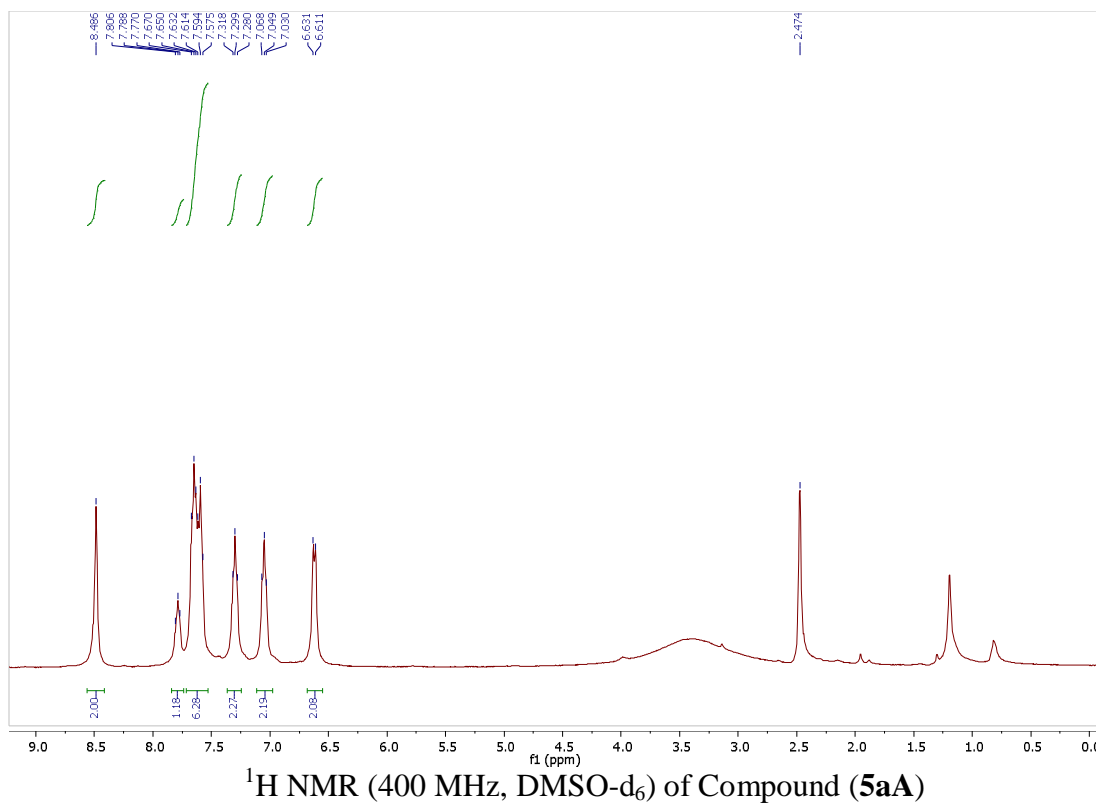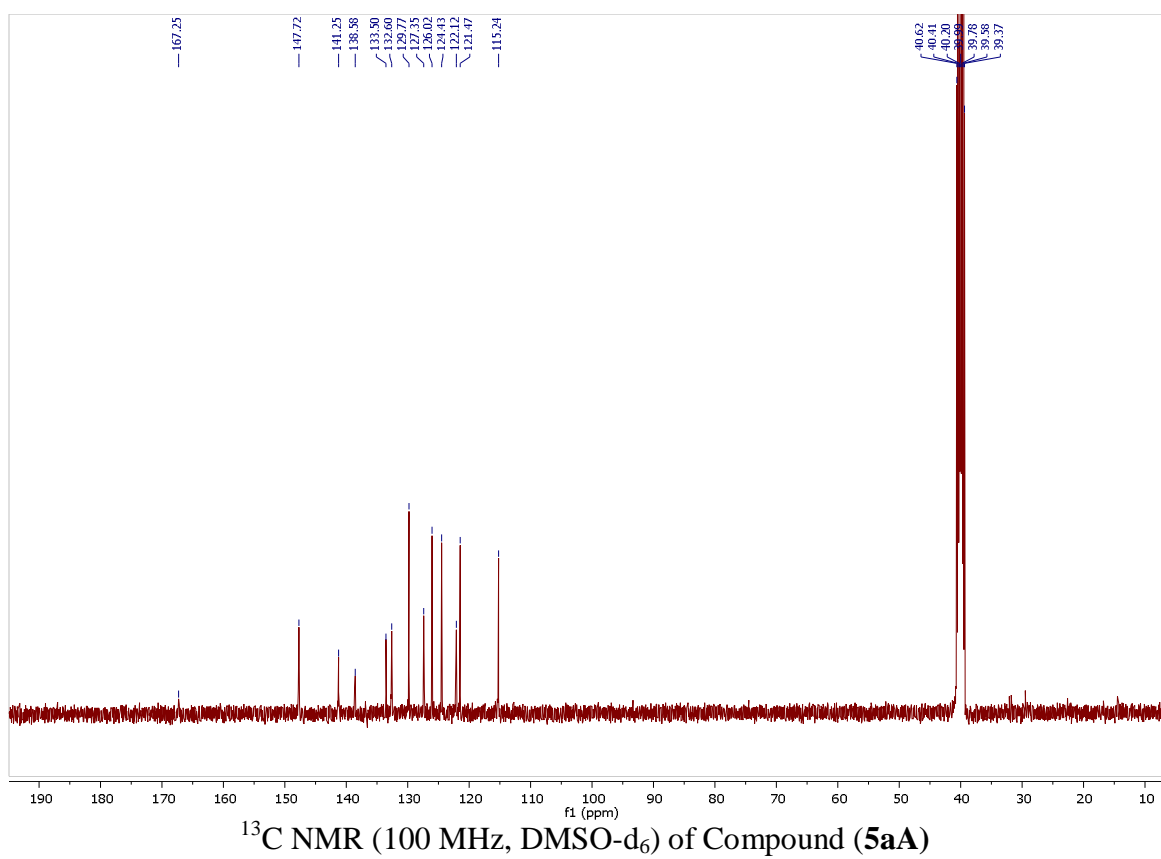

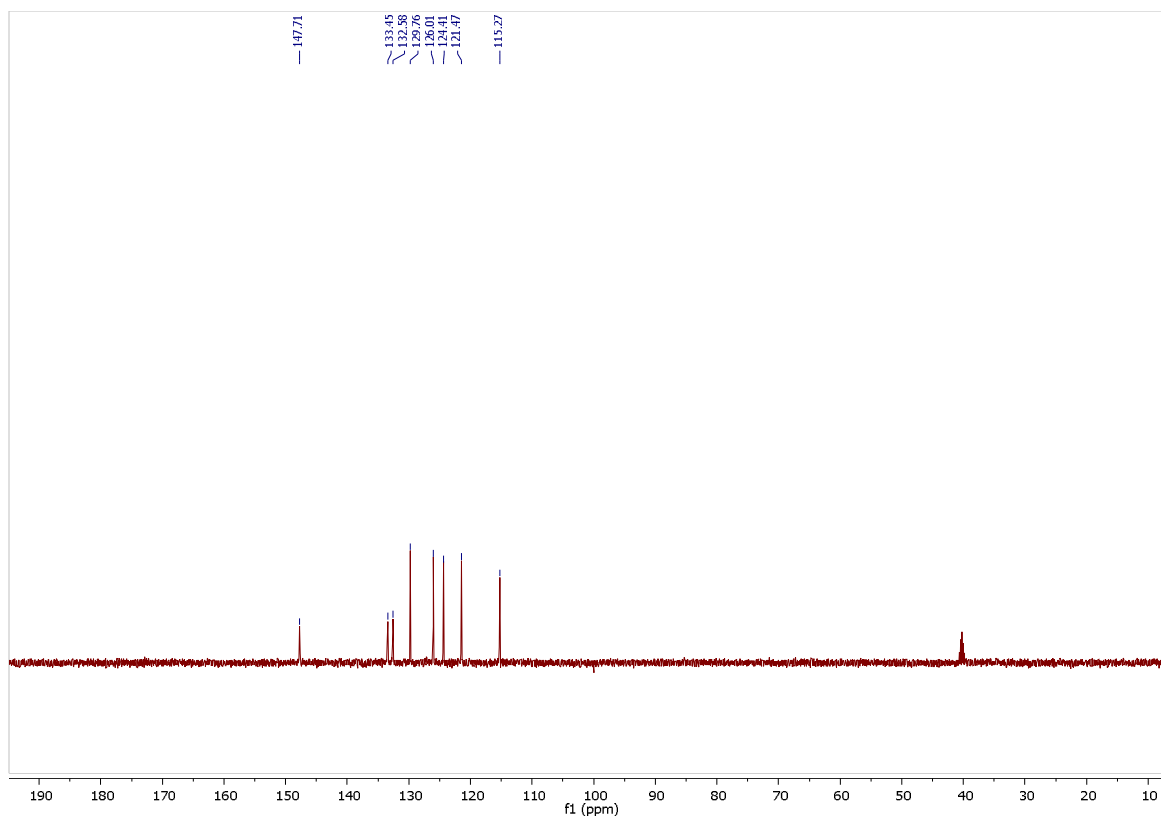

DEPT NMR (100 MHz, DMSO-d<sub>6</sub>) of Compound (**5aA**)

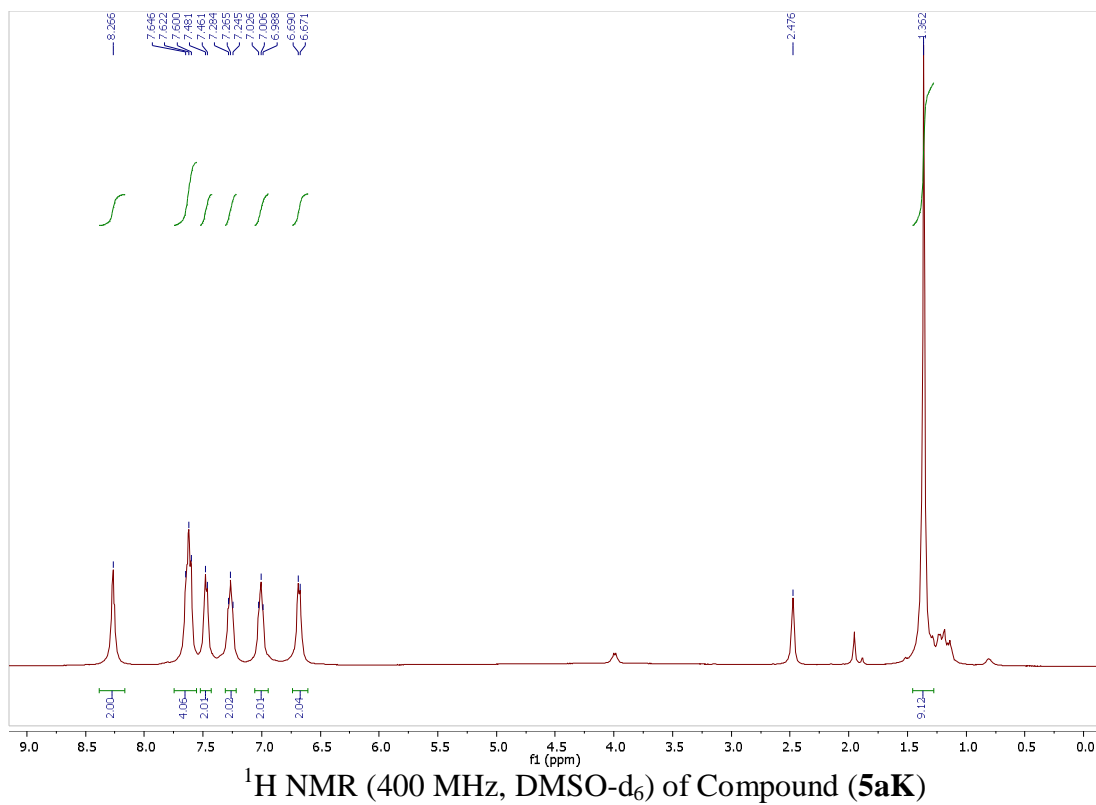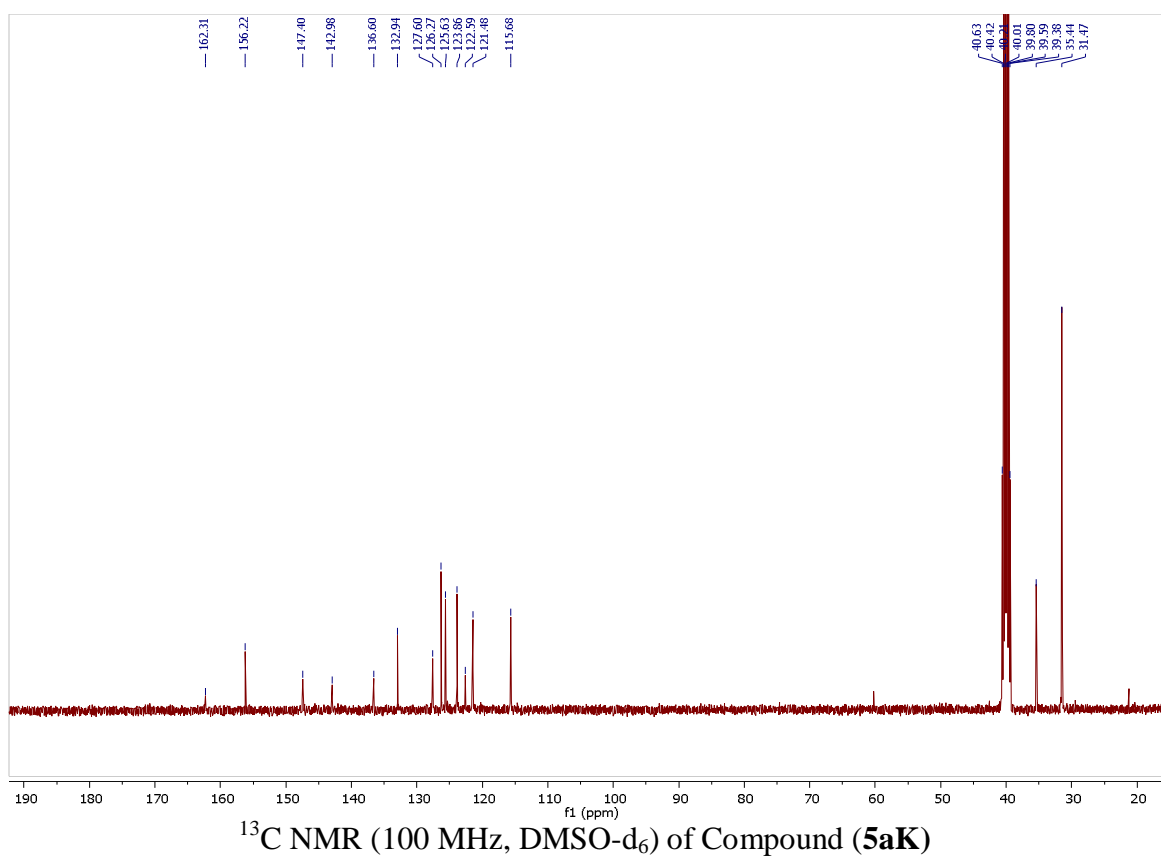

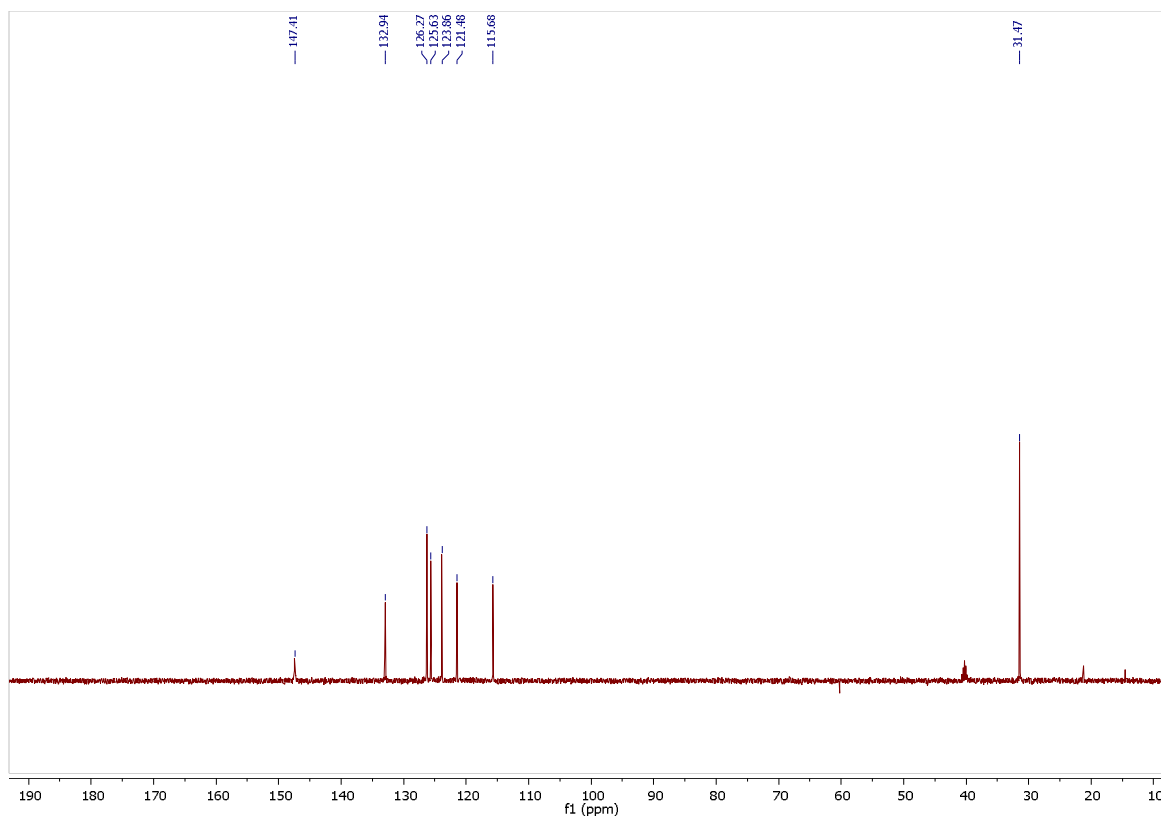

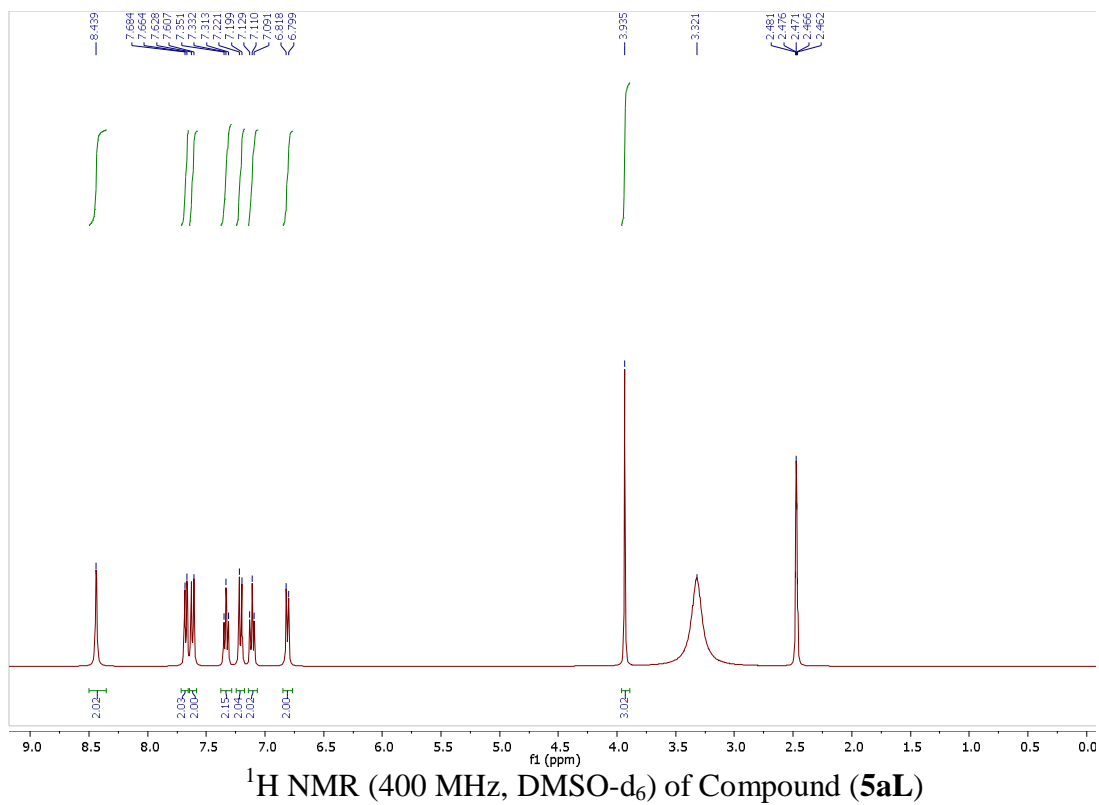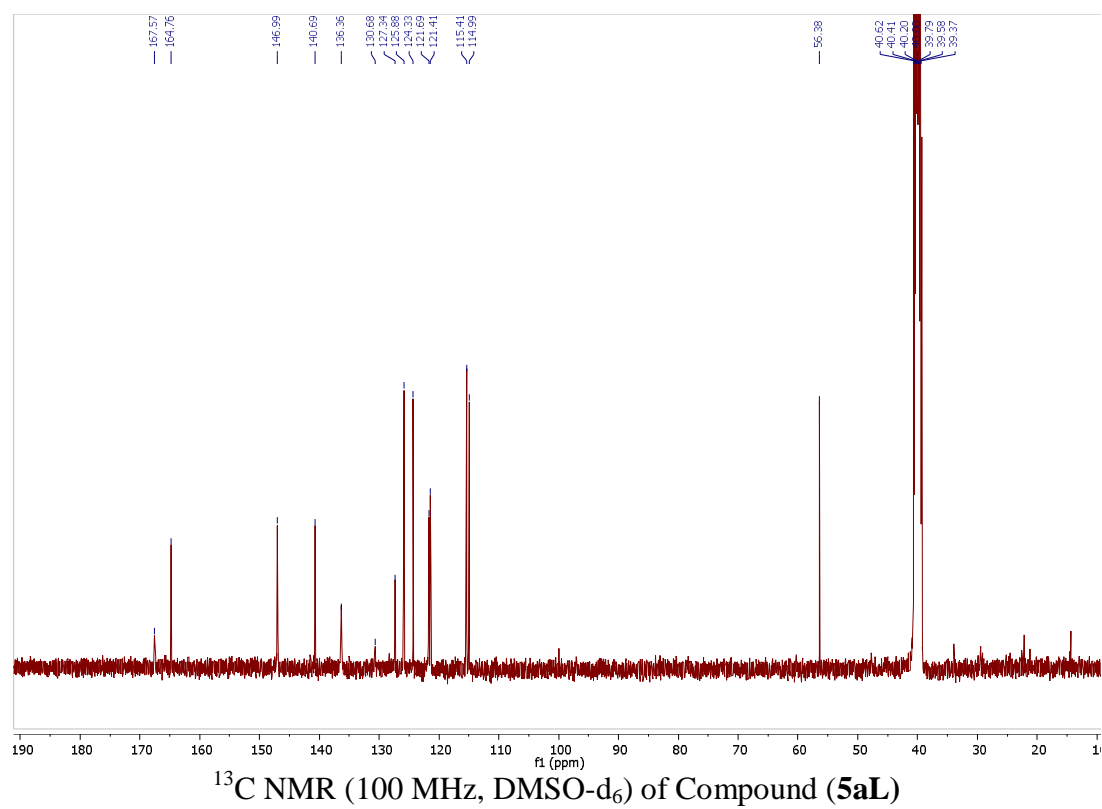

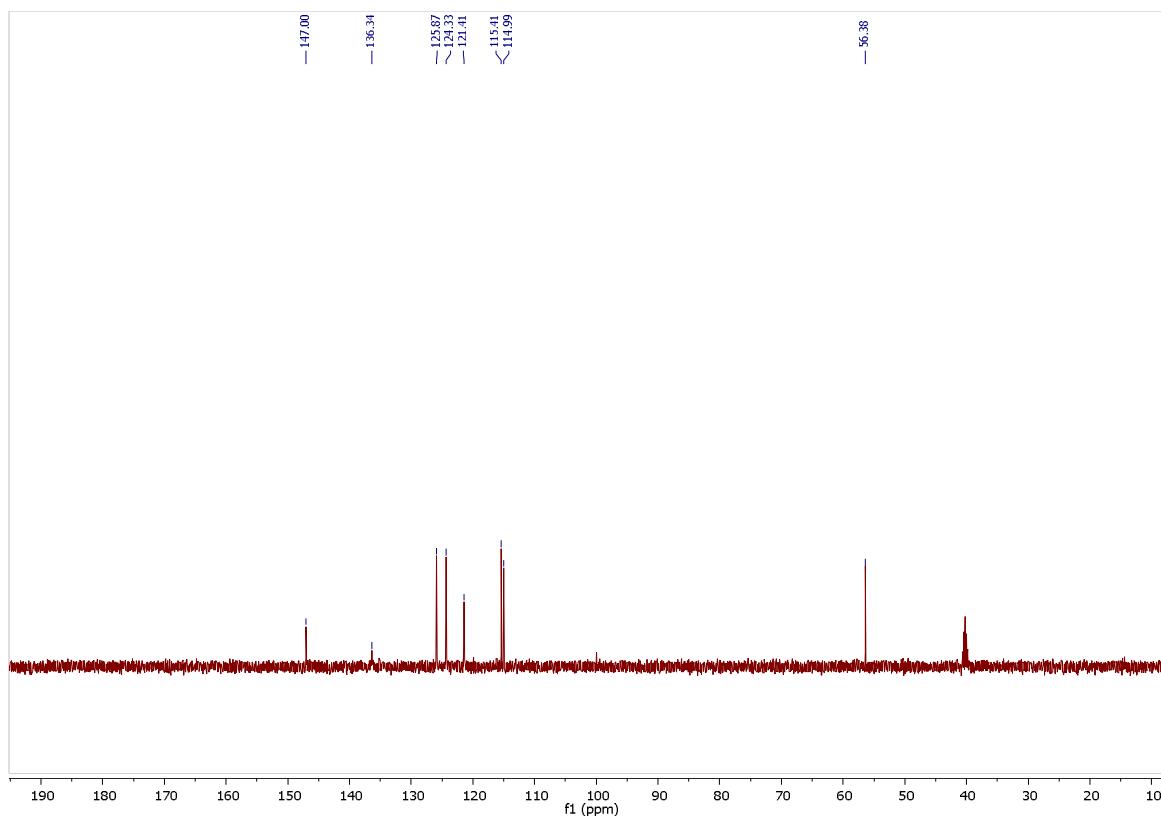

DEPT NMR (100 MHz, DMSO-d<sub>6</sub>) of Compound (**5aL**)

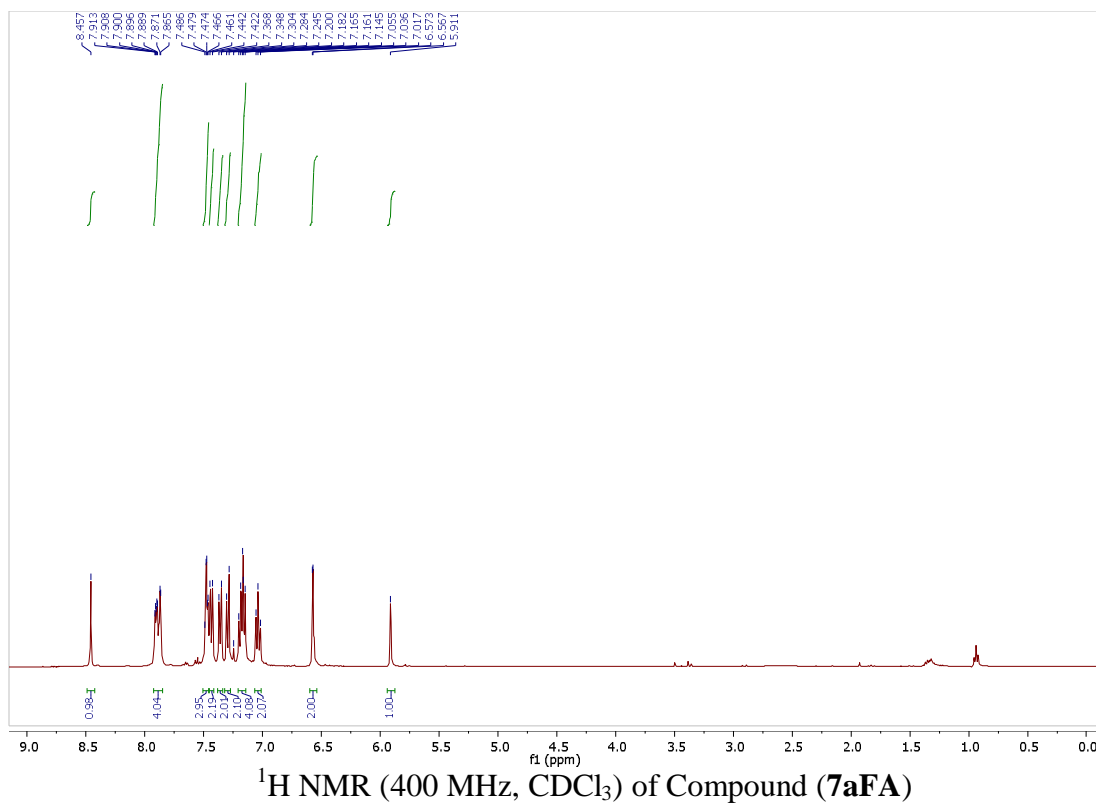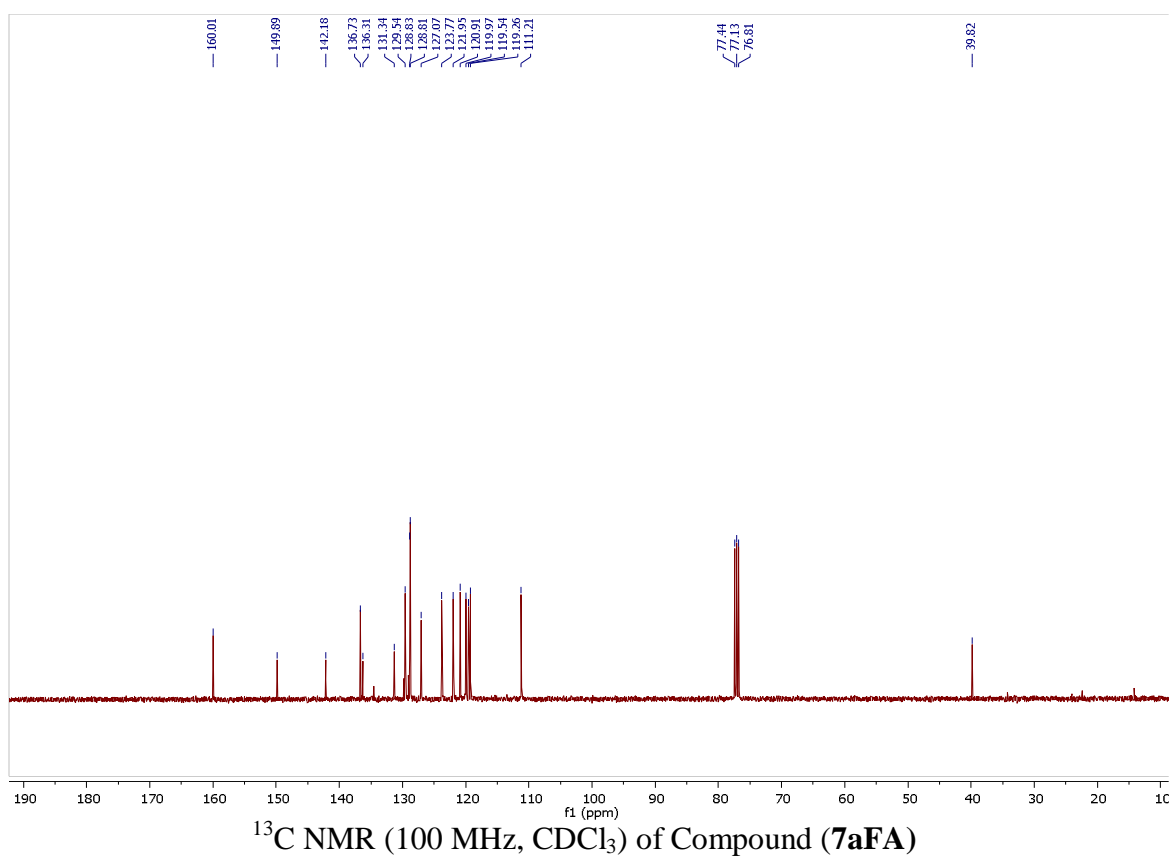

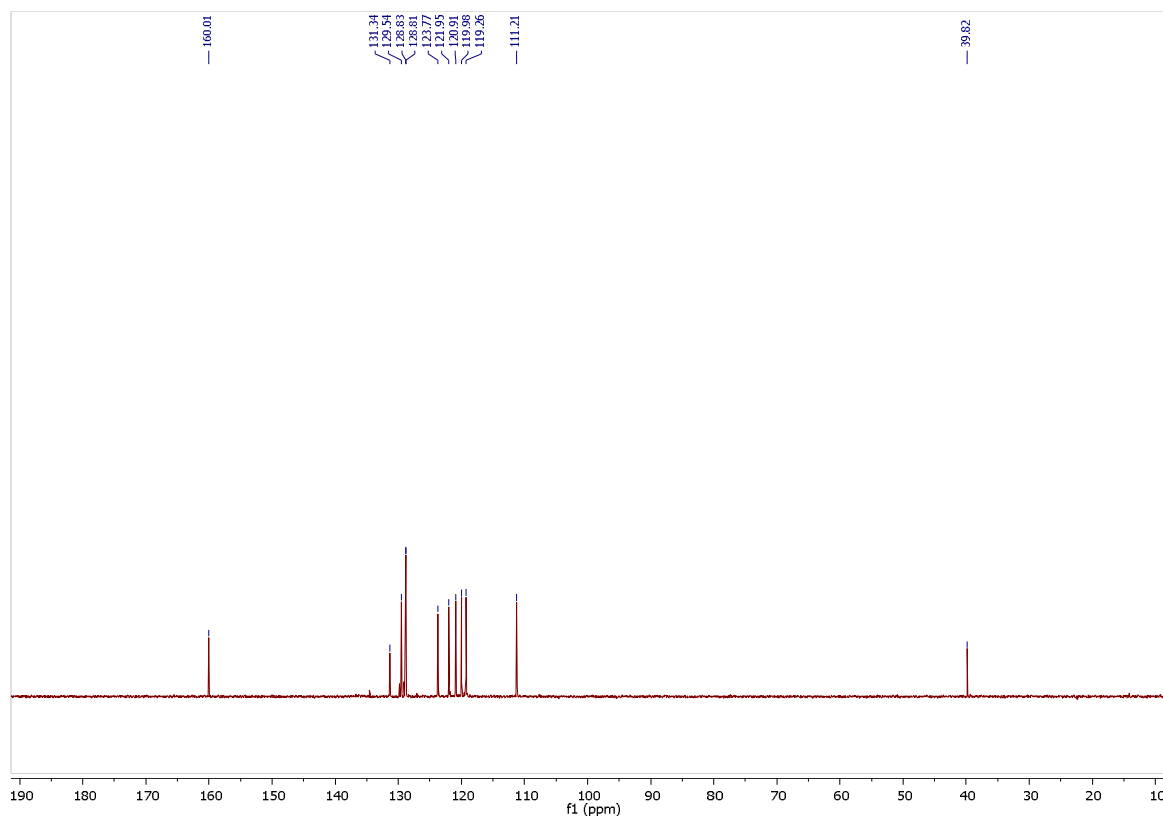

DEPT NMR (100 MHz,  $\text{CDCl}_3$ ) of Compound (**7aFA**)

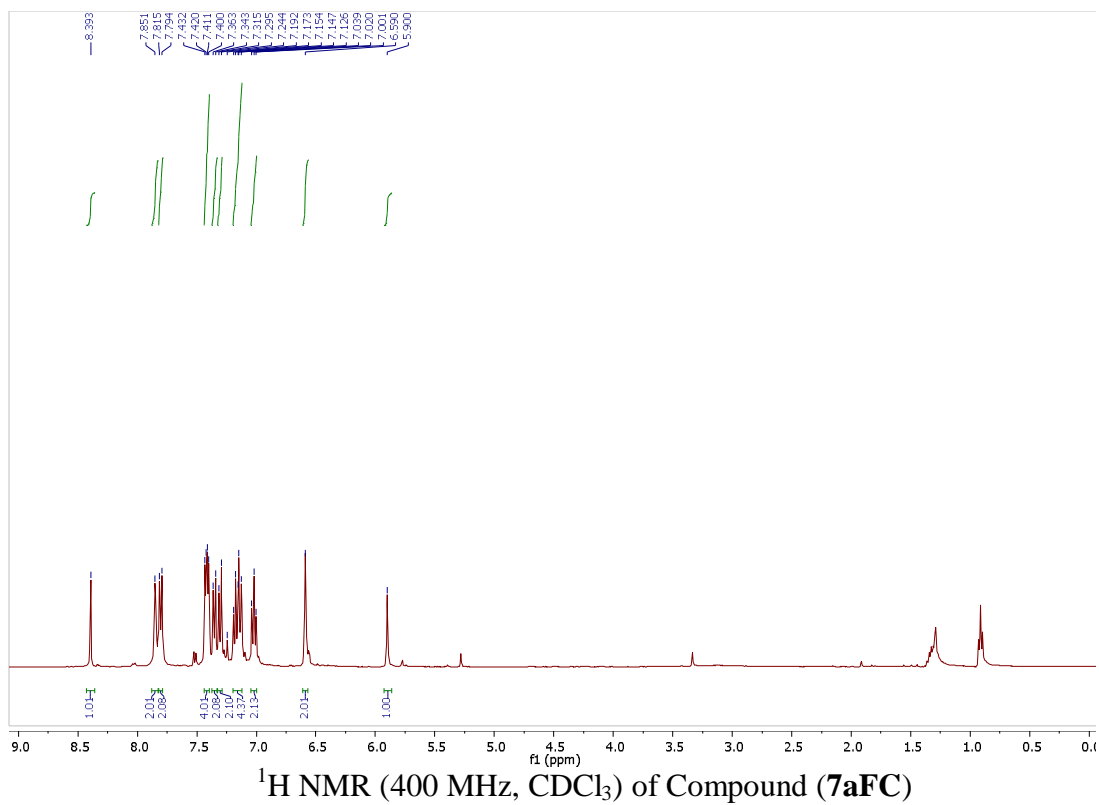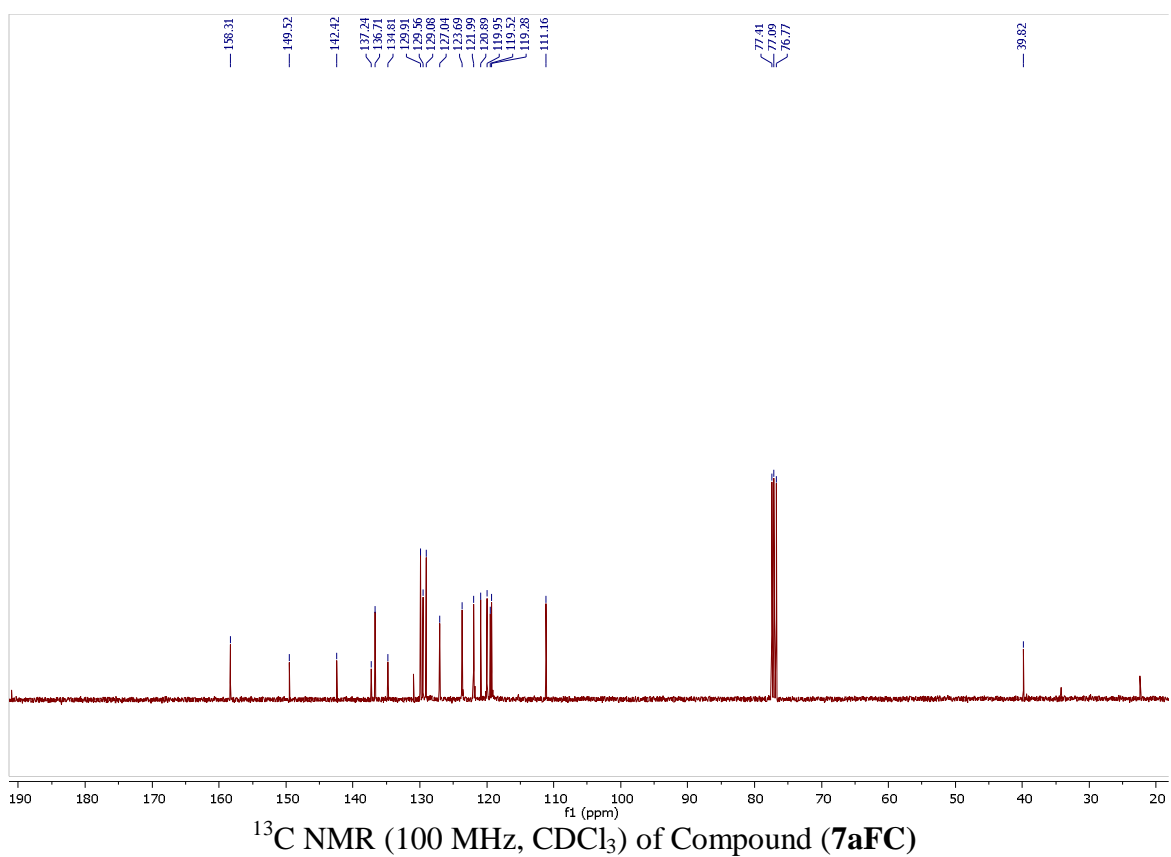

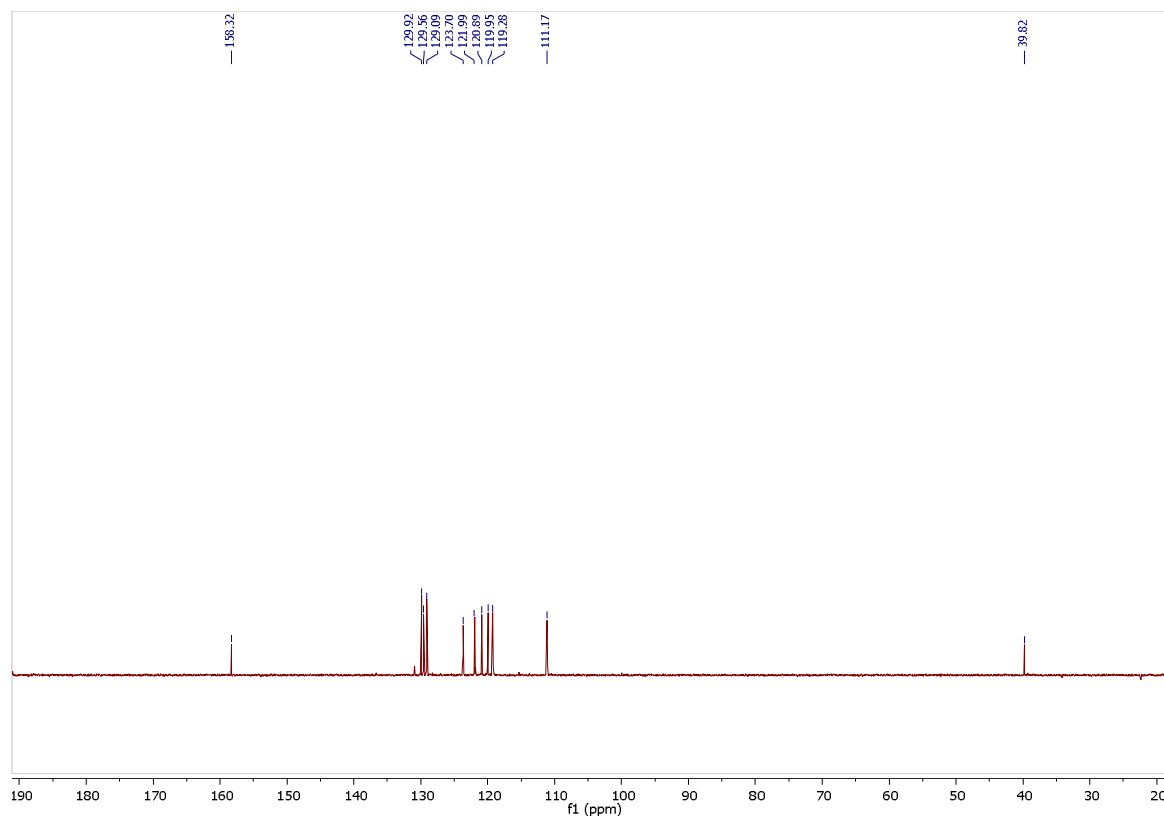

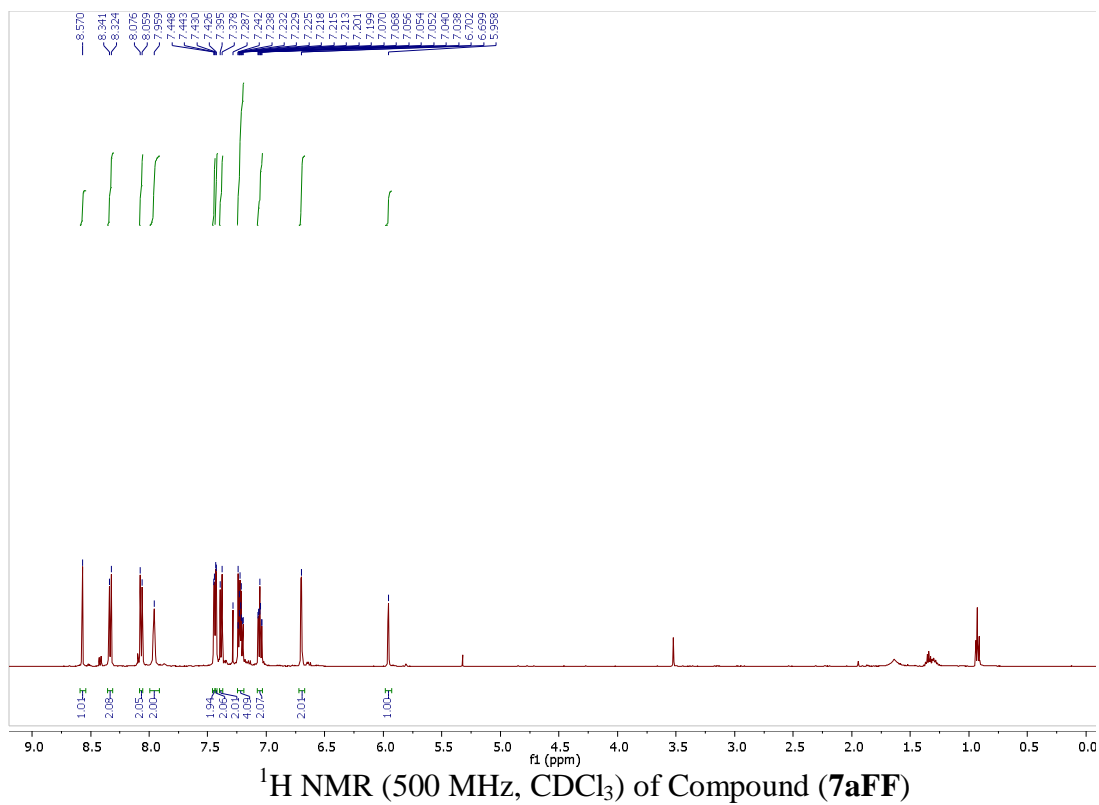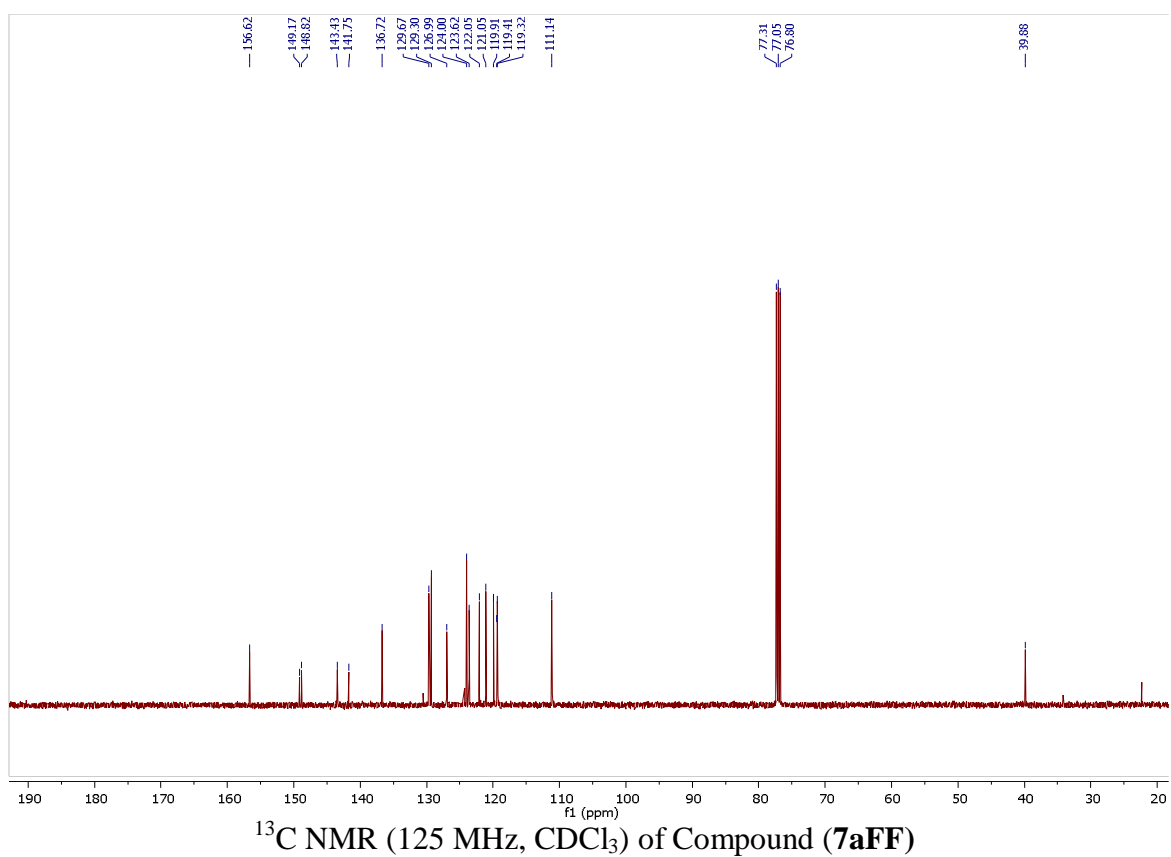

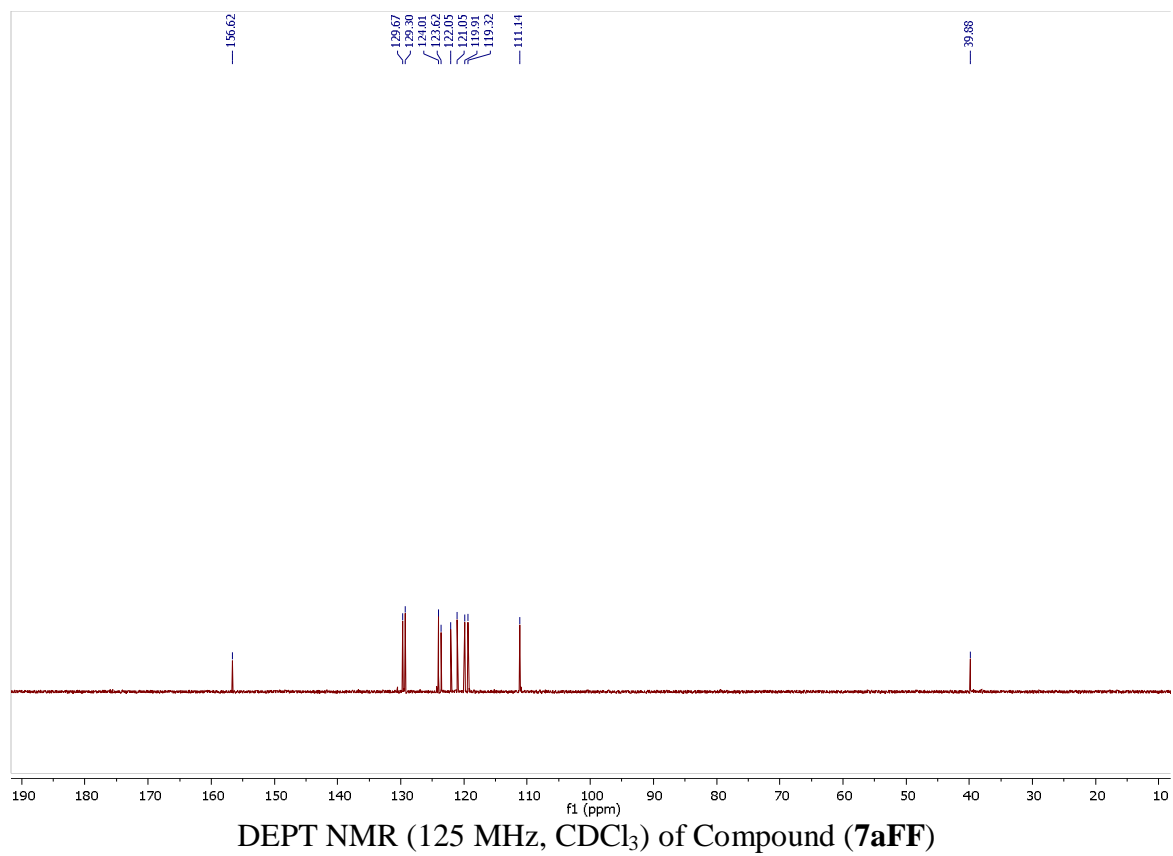

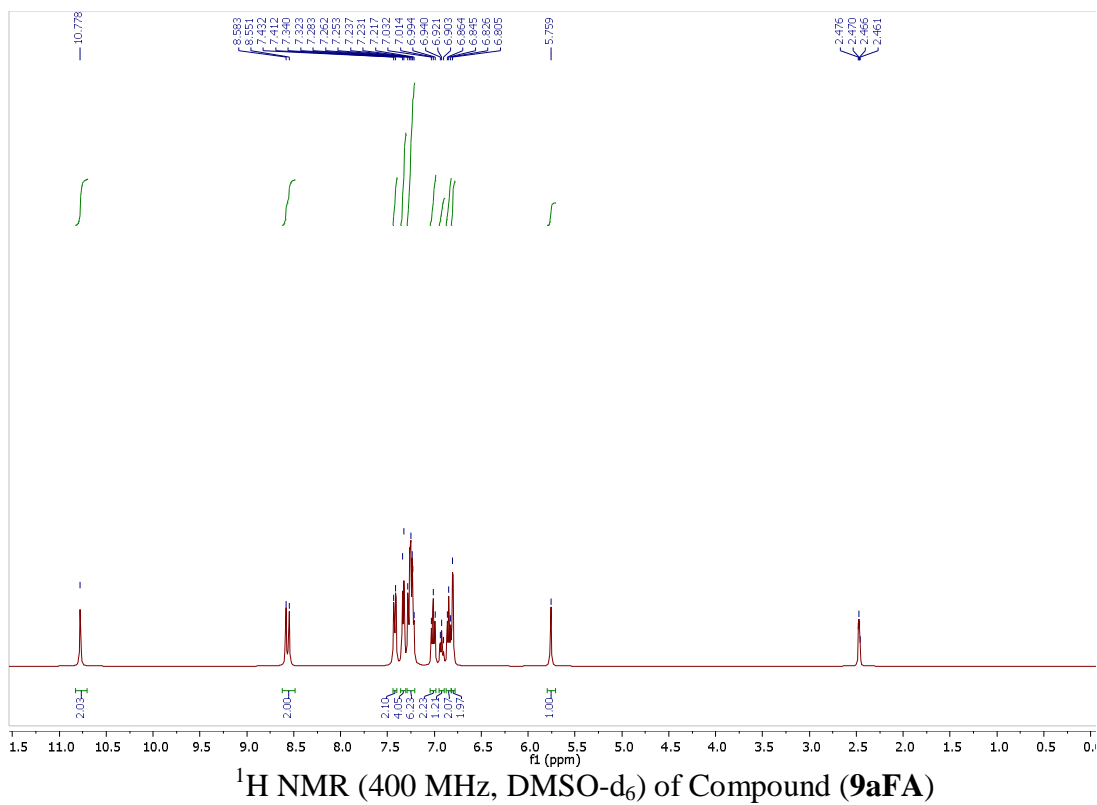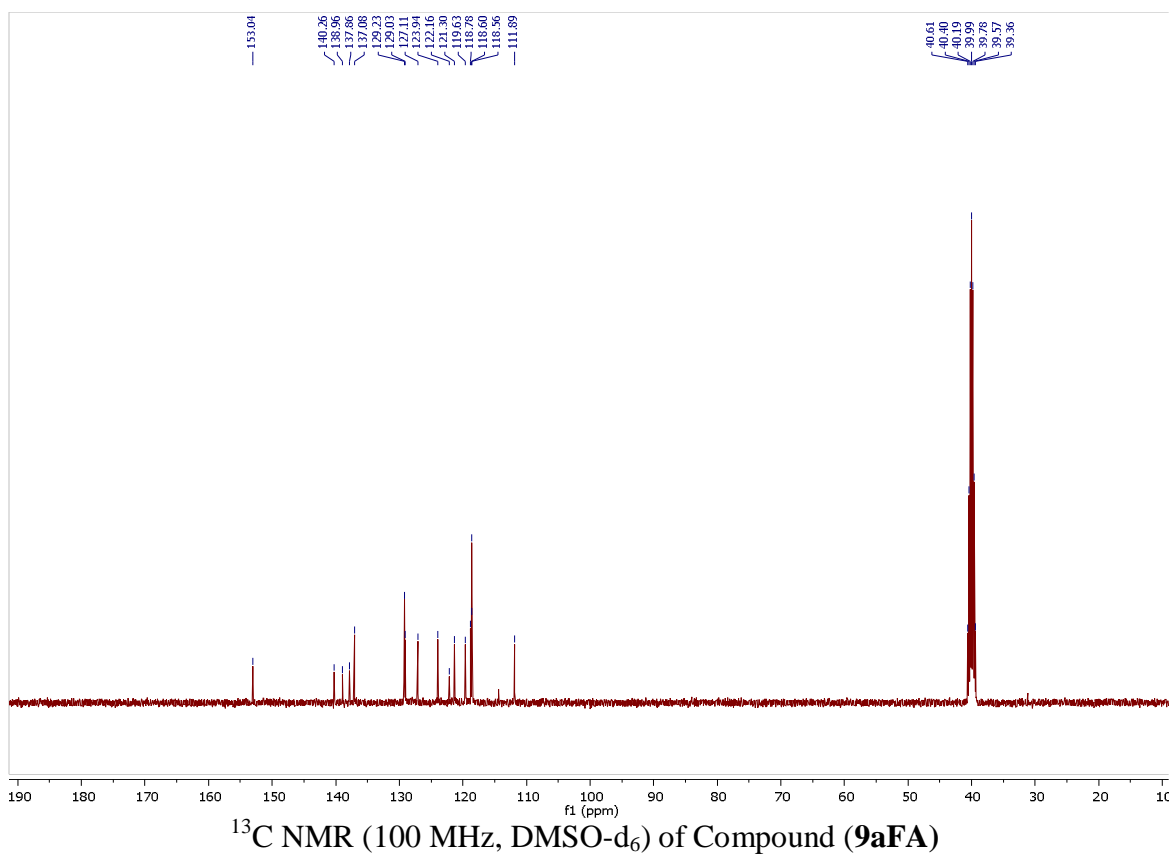

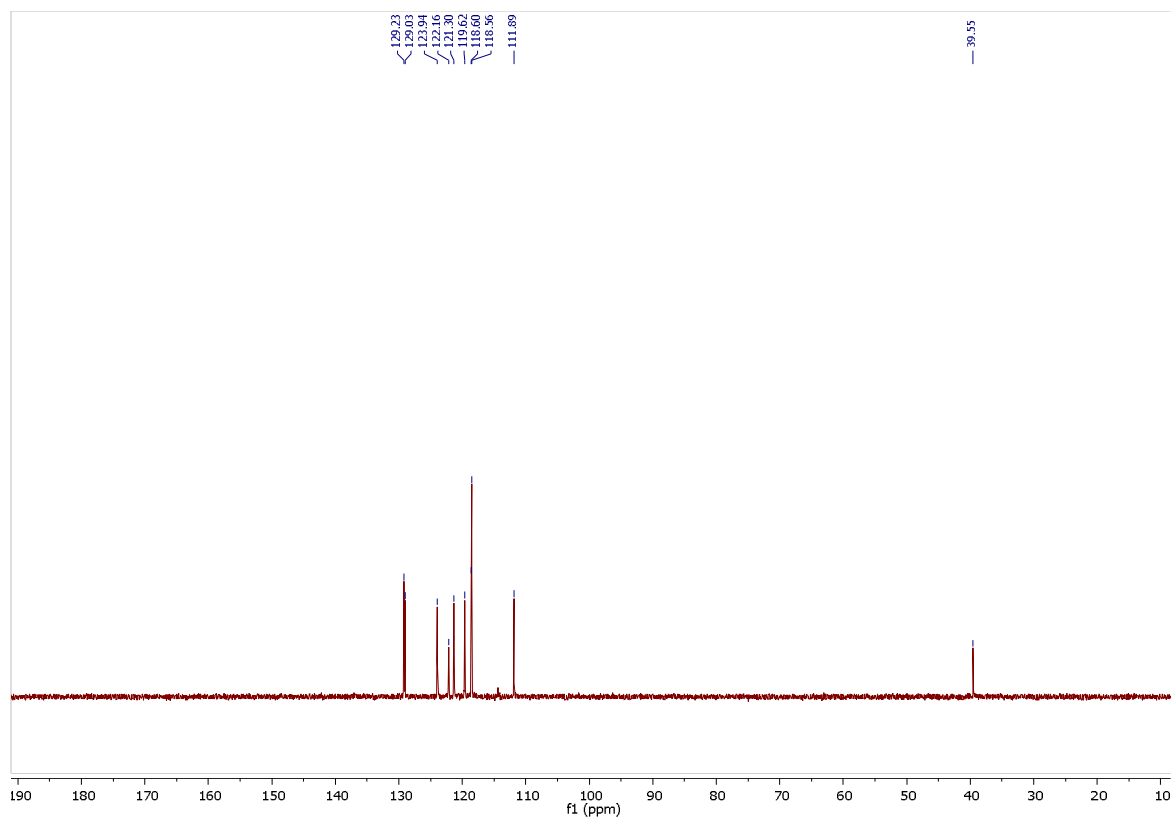

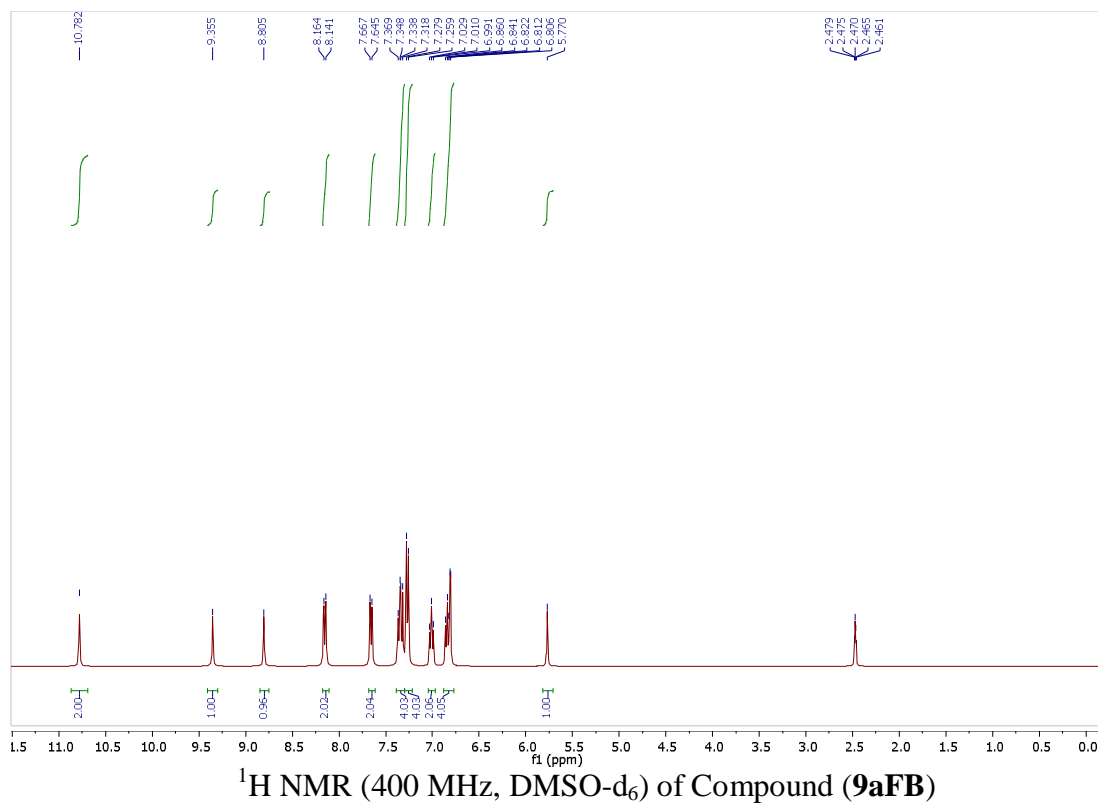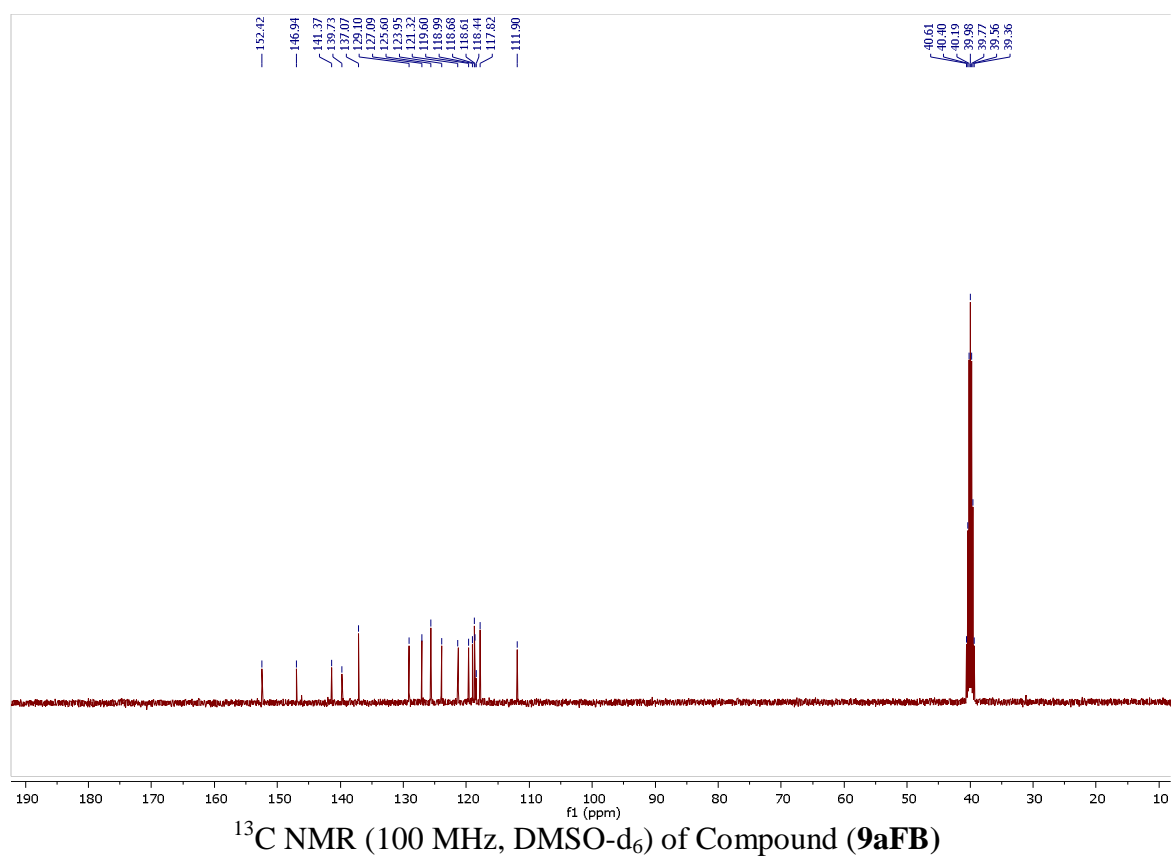

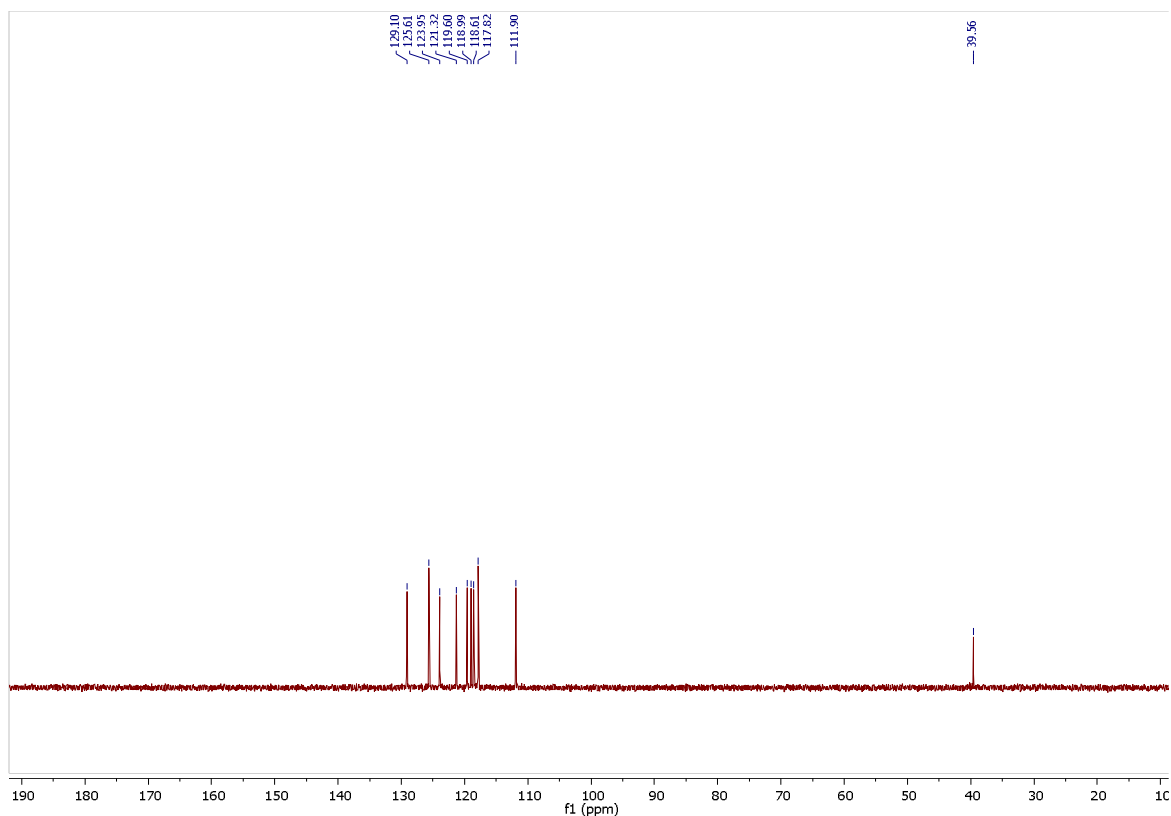

DEPT NMR (100 MHz, DMSO-d<sub>6</sub>) of Compound (9aFB)

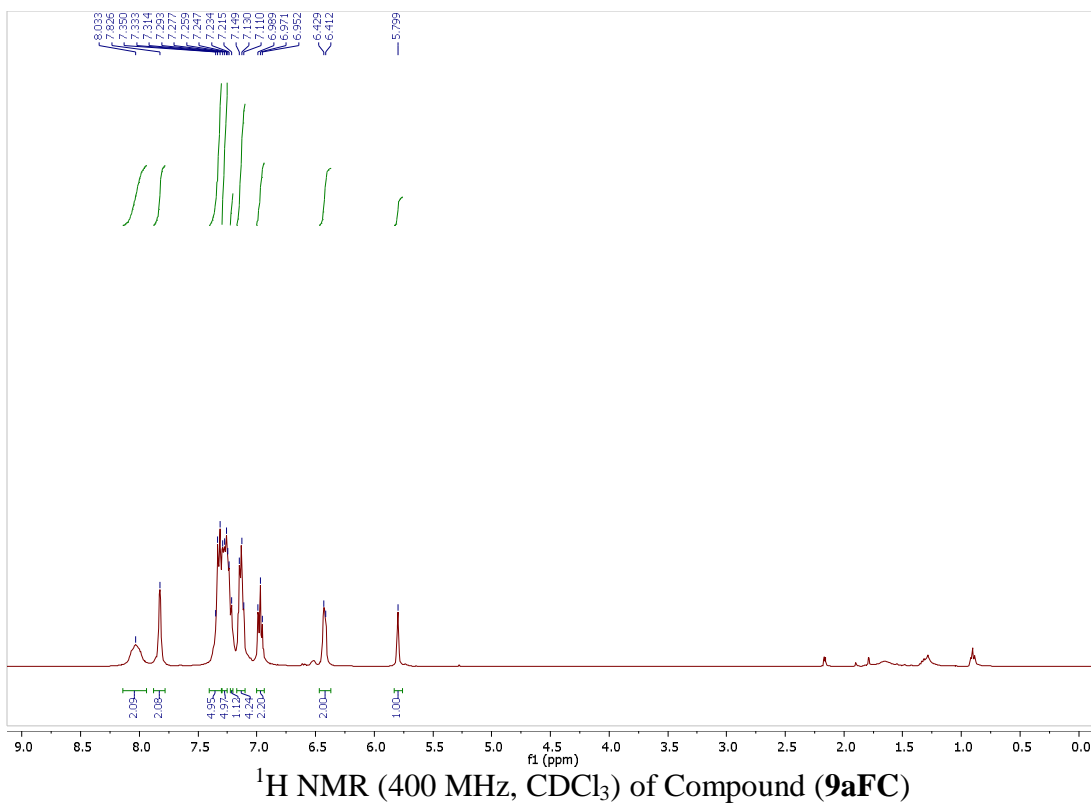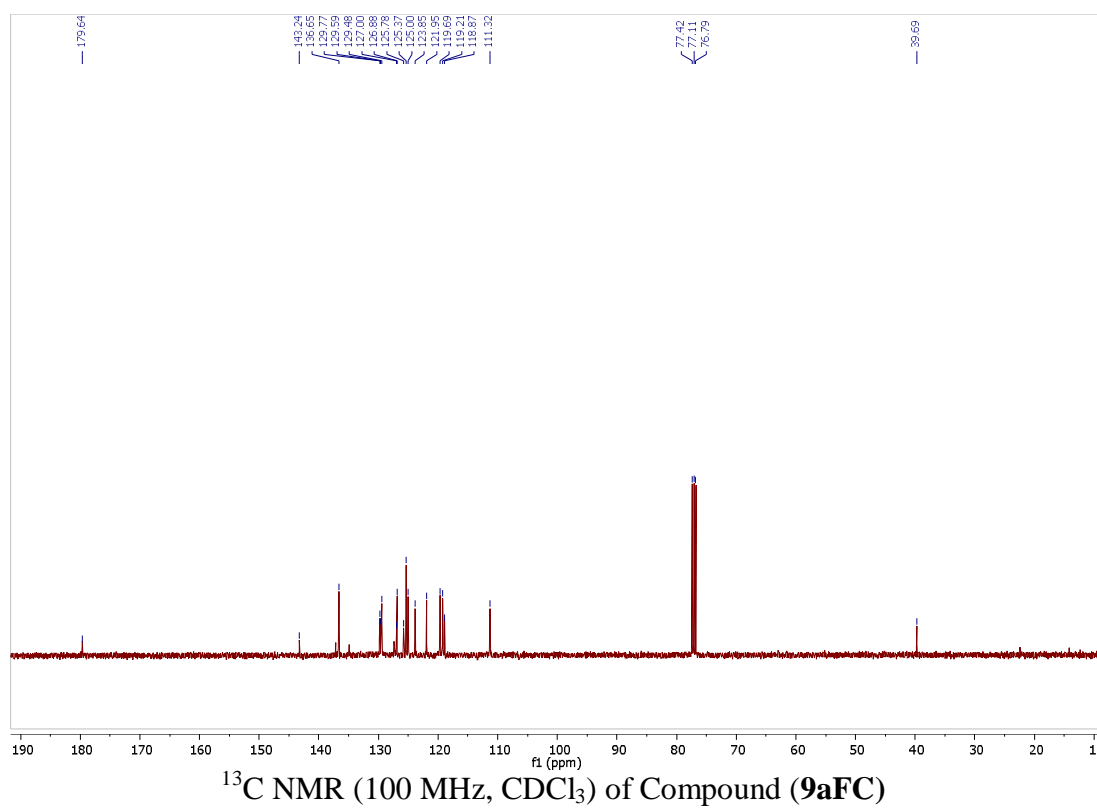

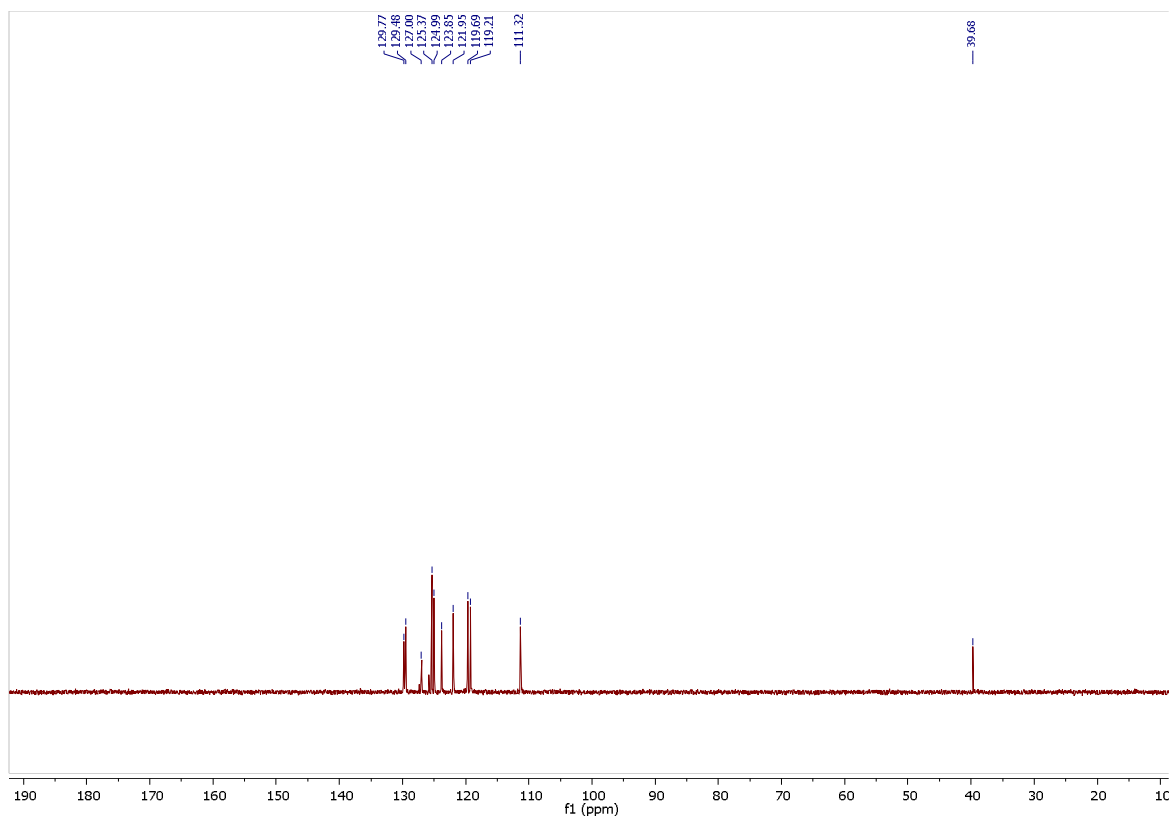

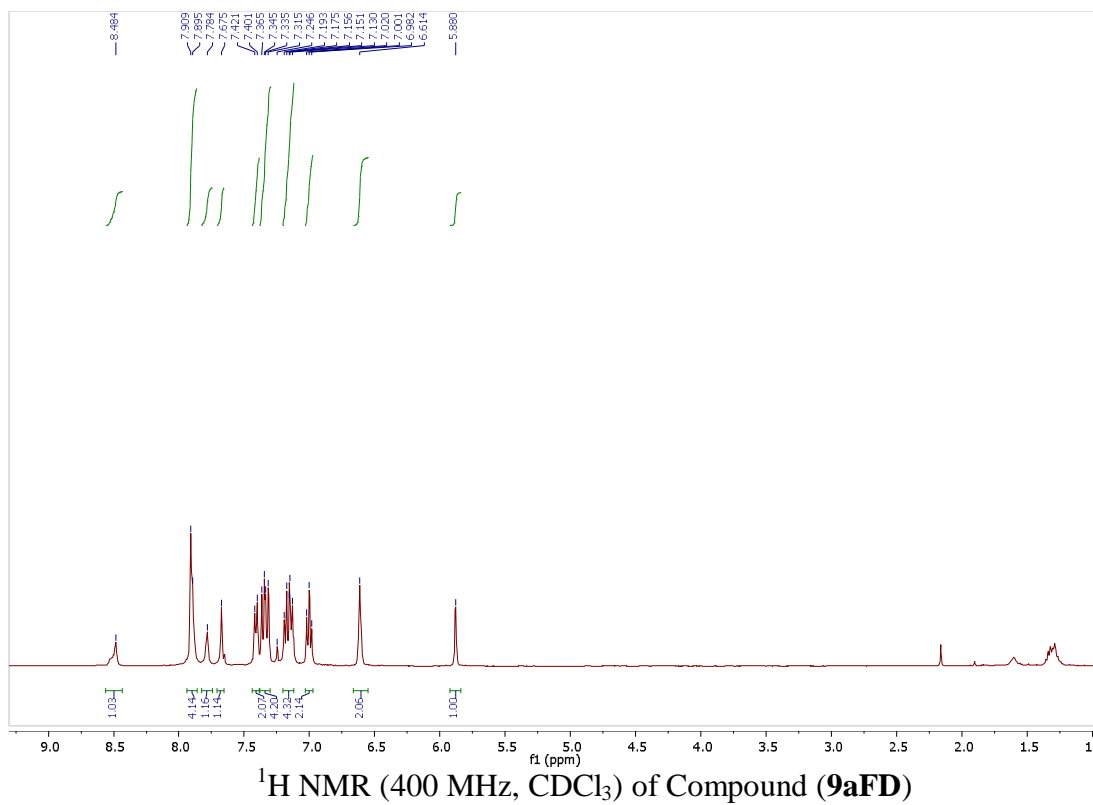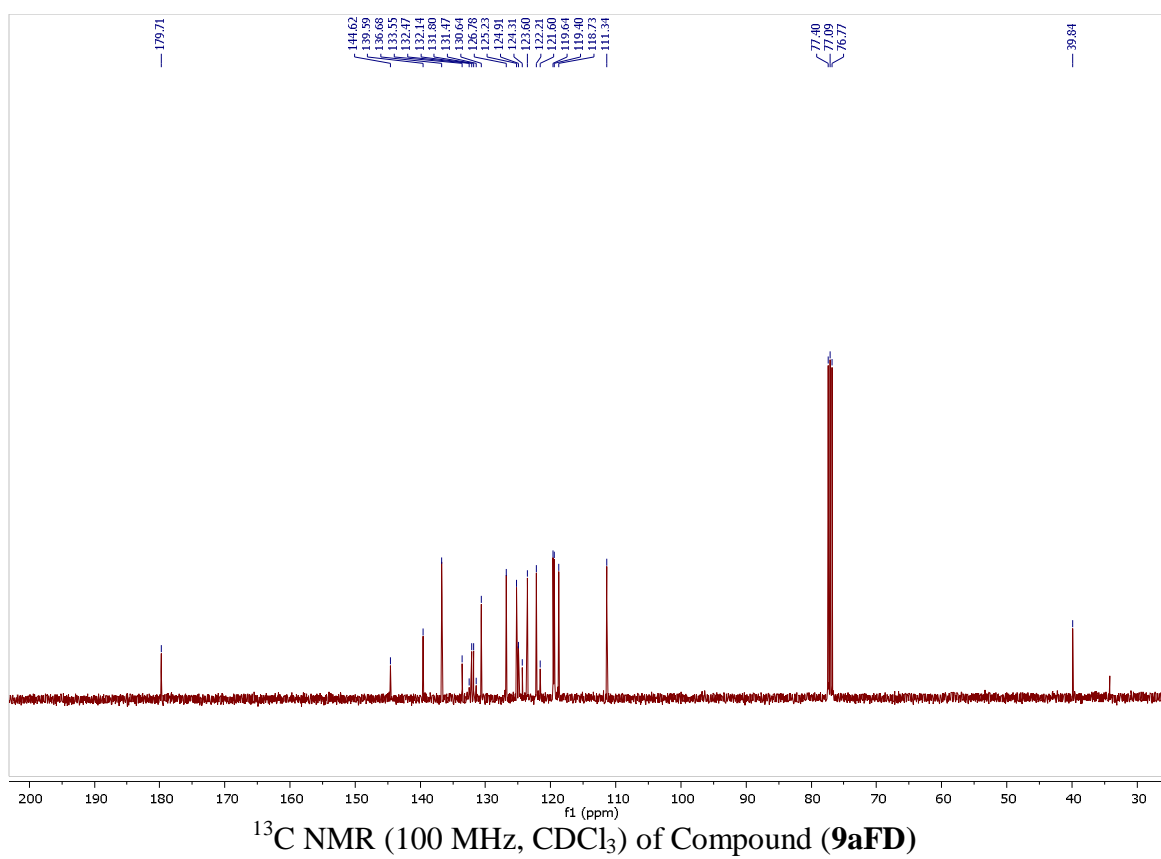

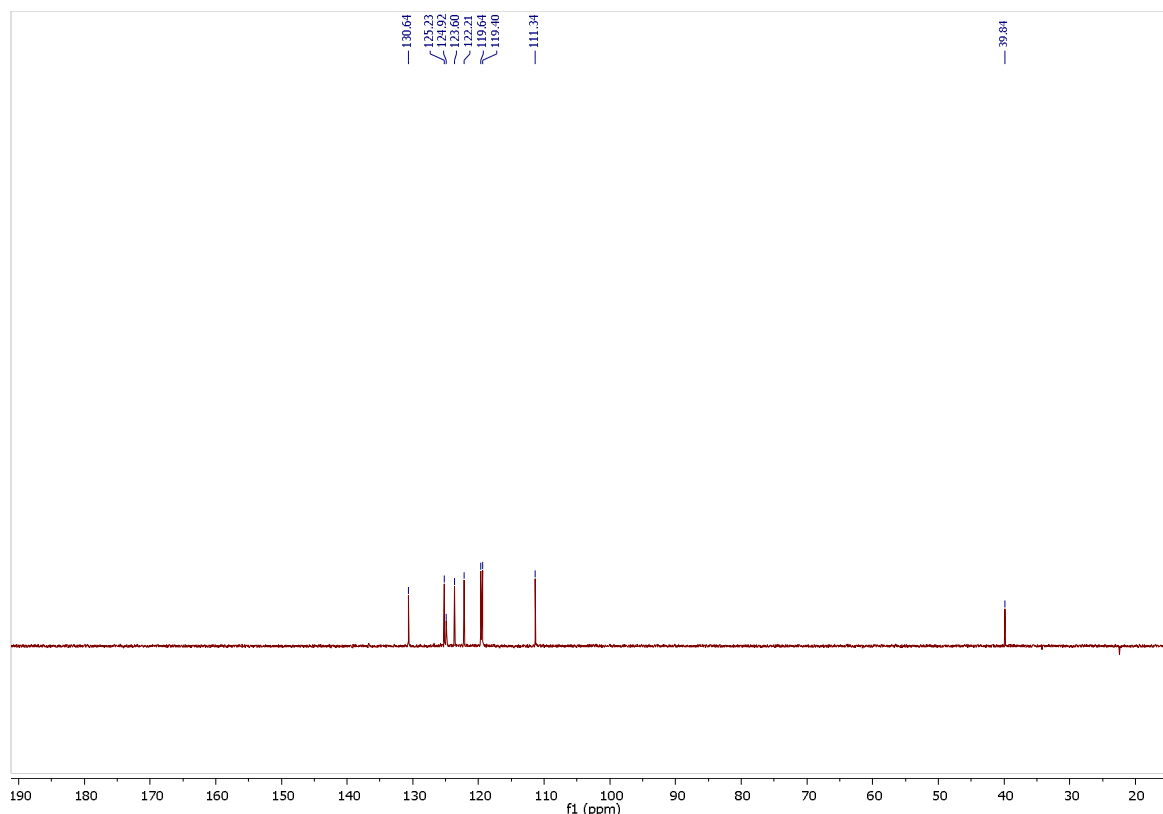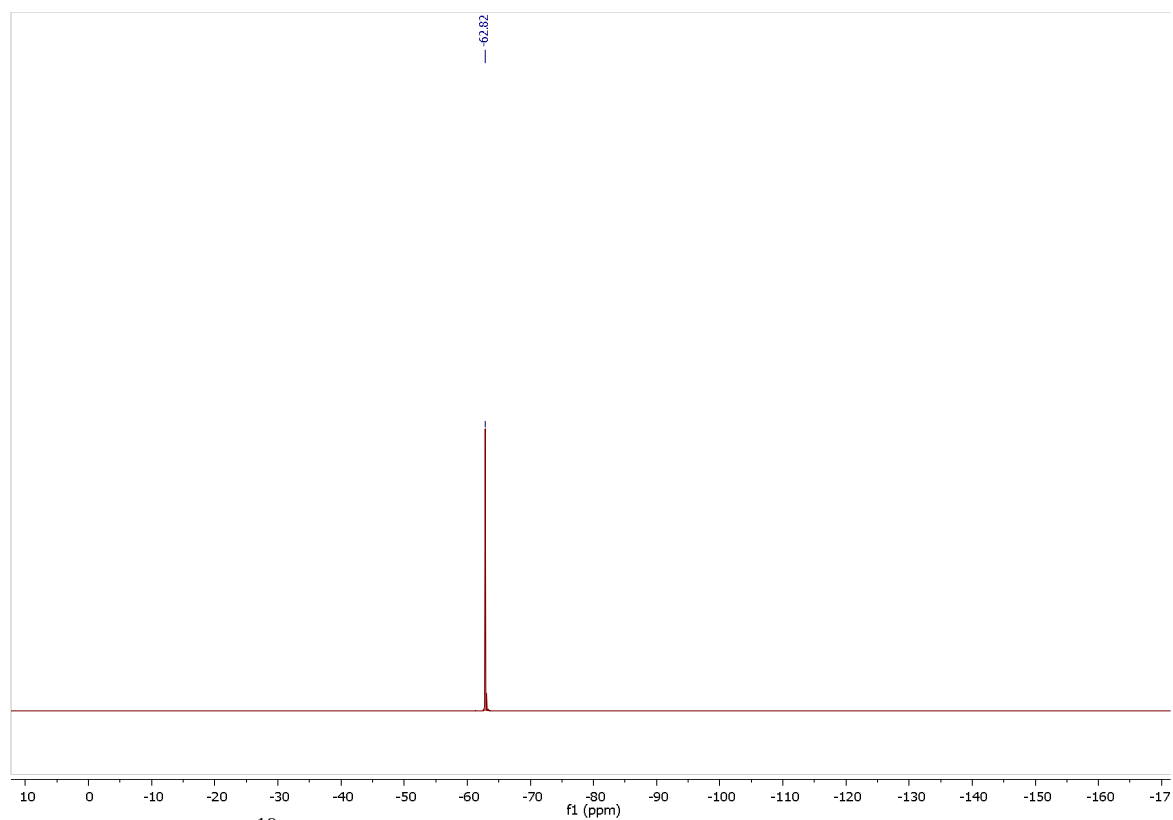

Supplement: c7ob01701d1.pdf [file c7ob01701d1.pdf]
